# Supplementary material for: ’Where are you really from?’: a qualitative study of racial microaggressions and the impact on medical students in the UK
Source: PubMed Central journal article supplement — BMJ Open. 2023 May 5;13(5):e069009. doi: 10.1136/bmjopen-2022-069009 (PMC10163503; doi:10.1136/bmjopen-2022-069009), 2023-05-05
Supplement: bmjopen-2022-069009.draft_revisions.pdf [file bmjopen-2022-069009.draft_revisions.pdf]

# BMJ Open

BMJ Open is committed to open peer review. As part of this commitment we make the peer review history of every article we publish publicly available.

When an article is published we post the peer reviewers' comments and the authors' responses online. We also post the versions of the paper that were used during peer review. These are the versions that the peer review comments apply to.

The versions of the paper that follow are the versions that were submitted during the peer review process. They are not the versions of record or the final published versions. They should not be cited or distributed as the published version of this manuscript.

BMJ Open is an open access journal and the full, final, typeset and author-corrected version of record of the manuscript is available on our site with no access controls, subscription charges or pay-per-view fees (<http://bmjopen.bmj.com>).

If you have any questions on BMJ Open's open peer review process please email [info.bmjopen@bmj.com](mailto:info.bmjopen@bmj.com)

# BMJ Open

## **“Where are you really from?”: A qualitative study of racial microaggressions and the impact on medical students in the United Kingdom**

|                               |                                                                                                                                                                                                                                                                                                                                                                                                                                                                                                                                     |
|-------------------------------|-------------------------------------------------------------------------------------------------------------------------------------------------------------------------------------------------------------------------------------------------------------------------------------------------------------------------------------------------------------------------------------------------------------------------------------------------------------------------------------------------------------------------------------|
| Journal:                      | <i>BMJ Open</i>                                                                                                                                                                                                                                                                                                                                                                                                                                                                                                                     |
| Manuscript ID                 | bmjopen-2022-069009                                                                                                                                                                                                                                                                                                                                                                                                                                                                                                                 |
| Article Type:                 | Original research                                                                                                                                                                                                                                                                                                                                                                                                                                                                                                                   |
| Date Submitted by the Author: | 07-Oct-2022                                                                                                                                                                                                                                                                                                                                                                                                                                                                                                                         |
| Complete List of Authors:     | Morrison, Nariell; University of Warwick Warwick Medical School, Clinical Trials Unit; University of Oxford, Department of Education<br>Zaman, Tabbasum; University of Warwick Warwick Medical School, Division of Health Sciences<br>Webster, Georgia; University of Warwick Warwick Medical School, Division of Health Sciences<br>Sorinola, Olanrewaju; University of Warwick Warwick Medical School, Division of Health Sciences<br>Blackburn, Clare; University of Warwick Warwick Medical School, Division of Health Sciences |
| Keywords:                     | MEDICAL EDUCATION & TRAINING, QUALITATIVE RESEARCH, EDUCATION & TRAINING (see Medical Education & Training)                                                                                                                                                                                                                                                                                                                                                                                                                         |
|                               |                                                                                                                                                                                                                                                                                                                                                                                                                                                                                                                                     |

SCHOLARONE™  
Manuscripts

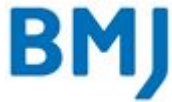

I, the Submitting Author has the right to grant and does grant on behalf of all authors of the Work (as defined in the below author licence), an exclusive licence and/or a non-exclusive licence for contributions from authors who are: i) UK Crown employees; ii) where BMJ has agreed a CC-BY licence shall apply, and/or iii) in accordance with the terms applicable for US Federal Government officers or employees acting as part of their official duties; on a worldwide, perpetual, irrevocable, royalty-free basis to BMJ Publishing Group Ltd ("BMJ") its licensees and where the relevant Journal is co-owned by BMJ to the co-owners of the Journal, to publish the Work in this journal and any other BMJ products and to exploit all rights, as set out in our [licence](#).

The Submitting Author accepts and understands that any supply made under these terms is made by BMJ to the Submitting Author unless you are acting as an employee on behalf of your employer or a postgraduate student of an affiliated institution which is paying any applicable article publishing charge ("APC") for Open Access articles. Where the Submitting Author wishes to make the Work available on an Open Access basis (and intends to pay the relevant APC), the terms of reuse of such Open Access shall be governed by a Creative Commons licence – details of these licences and which [Creative Commons](#) licence will apply to this Work are set out in our licence referred to above.

Other than as permitted in any relevant BMJ Author's Self Archiving Policies, I confirm this Work has not been accepted for publication elsewhere, is not being considered for publication elsewhere and does not duplicate material already published. I confirm all authors consent to publication of this Work and authorise the granting of this licence.

1  
2  
3  
4  
5 **“Where are you *really* from?”: A qualitative study of racial**  
6 **microaggressions and the impact on medical students in the**  
7 **United Kingdom**  
8  
9

10 **Authors:**

11 **Nariell Morrison**

12 Honorary Clinical Research Fellow  
13 Clinical Trials Unit  
14 Warwick Medical School  
15 University of Warwick  
16 Coventry, UK

17 MSc student

18 Department of Education  
19 University of Oxford  
20 Oxford, UK

21 **Tabbasum Zaman**

22 MBChB student  
23 Division of Health Sciences  
24 Warwick Medical School  
25 University of Warwick  
26 Coventry, UK

27 **Georgia Webster**

28 MBChB student  
29 Division of Health Sciences  
30 Warwick Medical School  
31 University of Warwick  
32 Coventry, UK

33 **Olanrewaju Sorinola**

34 Professor  
35 Division of Health Sciences  
36 Warwick Medical School  
37 University of Warwick  
38 Coventry, UK

39 **Clare M Blackburn**

40 Associate Professor  
41 Division of Health Sciences  
42 Warwick Medical School  
43 University of Warwick  
44 Coventry, UK

45 **Corresponding Author:** Nariell Morrison ([n.morrison@warwick.ac.uk](mailto:n.morrison@warwick.ac.uk))

1  
2  
3  
4 **Subject area:** Medical Education

5 **Keywords:** diversity, ethnic groups, microaggressions, undergraduate, medical education,  
6 qualitative research  
7

8  
9 **MeSH terms:**

10 Cultural diversity

11 Education, Medical, Undergraduate

12 Minority Groups

13 Microaggression

14 Learning

15 Qualitative Research

16 Racism

17 Students, Medical

18 Schools, Medical

19 United Kingdom  
20  
21  
22  
23

24 **Word count:** 9451  
25  
26  
27  
28  
29  
30  
31  
32  
33  
34  
35  
36  
37  
38  
39  
40  
41  
42  
43  
44  
45  
46  
47  
48  
49  
50  
51  
52  
53  
54  
55  
56  
57  
58  
59  
60

## Abstract

**Objective:** To explore graduate-entry medical students' experiences of racial microaggressions, the impact of these on learning, performance and attainment, and their views on how these can be reduced.

**Design:** Qualitative study using semi-structured focus groups and group interviews.

**Setting:** United Kingdom

**Participants:** 21 graduate-entry medical students were recruited using volunteer and snowball sampling; all students self-identified as being from racially minoritised (RM) backgrounds.

**Results:** Participants reported experiencing numerous types of racial microaggressions during their time at medical school. Students' accounts highlighted how these impacted directly and indirectly on their learning, performance, and well-being. Students frequently reported feeling uncomfortable and out of place in teaching sessions and clinical placements. Students also reported feeling invisible and ignored in placements and not being offered the same learning opportunities as their white counterparts. This led to a lack of access to learning experiences or disengagement from learning. Many participants described how being from a RM background was associated with feelings of apprehension and having their 'guards up', particularly at the start of new clinical placements. This was perceived to be an additional burden that was not experienced by their white counterparts. Students suggested that future interventions should focus on institutional changes to diversify student and staff populations; shifting the culture to build and maintain inclusive environments; encouraging open, transparent conversations around race and promptly managing any student-reported racial experiences.

**Conclusion:** RM students in this study reported that their medical school experiences were regularly affected by racial microaggressions. Students believed these microaggressions impeded their learning, performance, and well-being. It is imperative that institutions increase their awareness of the difficulties faced by RM students and provide appropriate support in challenging times. Fostering inclusion as well as embedding anti-racist pedagogy into medical curricula are likely to be beneficial.

## Article Summary

### Strengths and limitations of this study

- This is the first study to explore UK graduate-entry medical students' experiences of racial microaggressions. It aims to add new perspectives to existing research on both differential attainment and racism in medical education, by providing valuable insights into students' experiences and the impact of racial microaggressions on medical students' learning, attainment and well-being.
- This study provides a basis on which institutional interventions to facilitate supportive, inclusive learning environments can be developed and evaluated.
- Data collection was conducted online due to the safety restrictions imposed by the COVID-19 pandemic. This may have affected the rapport between the researchers and participants.
- Assessing the statistically significant association between racial microaggressions and medical students' mental health was beyond the scope of this paper.

## INTRODUCTION

Differential attainment in medical education due to ethnicity and race has been well documented globally(1). Studies suggest that students from racially minoritised (RM) backgrounds, on average, perform less well than white counterparts in both machine-marked assessments of clinical knowledge and practical assessments of clinical competence(2-4). It has been noted that these differential attainments related to ethnicity represents complex, systematic inequalities in societies(5). In recent years, studies on differential attainment have widened to explore how racism and discrimination in medical education impact on learners and how these can be addressed at structural and individual levels.

While researching overt and direct forms of racism in medical education continues to be important, it has been recognised that more subtle forms of racism such as racial microaggressions impact on students and are likely to contribute to attainment differentials. Racial microaggressions are defined as 'brief and commonplace daily verbal, behavioural, or environmental indignities, whether intentional or unintentional, that communicate hostile, derogatory, or negative racial slights and insults toward people of colour'(6). Studies have shown that these 'subtle racist' interactions(7) have caused distress, affect wellbeing and mental health and have impacted on learning and academic attainment on learners in different educational settings, including primary, secondary and tertiary educational institutions(8-14). While evidence of microaggressions and their impact on learners in medicine is emerging, the evidence base relating to undergraduate medical students is small and largely from the US(7, 15-23). Although these studies document medical students' reports of microaggressions and provide some evidence of impacts on learning, with the exception of Ackerman-Barger et al's work(15), they offer few insights into how microaggressions directly and indirectly impact on learning and ultimately, attainment. Furthermore, the extent to which the findings from these studies can be extended to medical students learning in different health care systems and socio-cultural contexts beyond the US is unclear. Two recent studies from the UK(24) and Sweden(7) highlighted daily experiences of microaggressions and provided some limited insights on impacts on learning. If medical schools are to address differential attainment and create positive learning environments for RM students, there is an urgent need to understand how microaggressions are experienced by medical students in other countries and how they impact on their learning.

To the best of our knowledge, no published studies have explored, in any depth, racial microaggressions as experienced by United Kingdom (UK) medical students and their impact on learning. The UK Equality Act 2010 places a legal duty on universities to address



1  
2  
3 any form of discrimination or harassment related to a protected characteristic that may be  
4 adversely impacting on students' learning experiences and environment(25). Graduate-entry  
5 medical (GEM) students have already demonstrated high academic achievements as they  
6 enter the medical programme with an existing undergraduate degree. As GEM courses  
7 currently accounts for approximately 10% of all UK medical programmes(26), it is important  
8 to report the experiences of RM GEM students and examine any impact on learning and  
9 attainment; thus, contributing to the portfolio of research into racism and differential  
10 attainment in medical education.  
11  
12  
13  
14  
15

16  
17 This paper reports data from a study of GEM students in the UK that built upon *Ackerman-*  
18 *Barger et al's* work(15), exploring UK GEM students' experiences of racial microaggressions  
19 and examining the impacts of these on learning, performance and attainment. The use of  
20 terms to describe minority communities is a contested issue. We have chosen to use the  
21 term RM throughout this paper. Many scholars have highlighted the problematic use of the  
22 term 'Black, Asian and Minority Ethnic' (BAME), including its grouping together of diverse  
23 ethnicities into a single homogenous ethnic group(27, 28). The term RM provides a social  
24 constructionist approach to understanding that individuals have been actively minoritised by  
25 others through social processes of power and privilege(29). Terms such as BAME, ethnic  
26 minority and person of colour, do not acknowledge the influence of social processes.  
27  
28  
29  
30  
31  
32  
33

34 Although we support the use of RM, we are aware that language is continuously evolving,  
35 within and between groups. It is imperative to highlight that people will have their own  
36 preferences as to how they identify or describe themselves. Therefore, we are cautious not  
37 to dismiss the use of racial categories with which people identify, such as Black and mixed  
38 race.  
39  
40  
41  
42  
43  
44

## 45 **METHODS**

### 46 **Design**

47 To explore and understand medical school students' experiences, this work was undertaken  
48 through a social constructivist lens. This paradigm recognises that knowledge and reality are  
49 subjective in nature and allows multiple realities to exist. Social constructivism emphasises  
50 that learning and other cognitive functions are critically influenced by the environment,  
51 culture and social interactions(30). Given that students' learning experience in medical  
52 education can be theorised as a social process(30), social constructivism is an appropriate  
53 conceptual framework to direct and guide this work. A qualitative approach, using focus  
54 groups and group interviews to collect participants' narratives, was selected as this enabled  
55  
56  
57  
58  
59  
60

1  
2  
3 reporting the realities as perceived by participants and promoted an understanding of the  
4 social and cultural contexts that influence participants' experiences(31-33).  
5  
6  
7

8 Befitting our interpretivist approach, we also acknowledge the active role of the researchers  
9 (and subsequent subjectivity) in this study's design and analysis(34). Thus, in the interest of  
10 reflexivity, we have detailed our own backgrounds. NM is an Honorary Clinical Research  
11 Fellow and a MSc student in Medical Education involved in researching differential  
12 attainment by ethnicity, and a medical doctor who has experienced racial discrimination first-  
13 hand. TZ and GW are GEM students, who have witnessed and experienced racism during  
14 their studies. OS is a Professor of Medical Education and a Consultant Obstetrician and  
15 Urogynaecologist involved in exploring differential attainment between ethnic groups and  
16 has also experienced racial discrimination. NM, TZ, GW and OS self-identify as being from  
17 RM backgrounds, namely Black British, Asian Pakistani, Mixed White/Black Caribbean, and  
18 Black African respectively. CB is an Associate Professor in Health Sciences who has  
19 extensively researched health and medical education in relation to socio-economic  
20 inequalities and socio-demographic factors. CB previously worked as a nurse and health  
21 visitor and self-identifies as White British. All research team members have had prior  
22 experience undertaking qualitative research projects.  
23  
24  
25  
26  
27  
28  
29  
30  
31  
32

### 33 **Ethical approval**

34 Institutional ethical approval was obtained in March 2021 from the University of Warwick's  
35 Biomedical & Scientific Research Ethics Committee. The study involved data collection and  
36 analysis of the protected characteristic of ethnicity(35). To ensure confidentiality, data security  
37 and compliance with the General Data Protection Regulations, all data were anonymised and  
38 held only by the research team. All participants confirmed on their consent form that they  
39 agreed to keep confidential participants' identities as well as the information discussed during  
40 the focus group/group interview.  
41  
42  
43  
44  
45  
46  
47

### 48 **Sample strategy and recruitment**

49 GEM students from medical schools in the UK who self-identified as being from a RM  
50 background were recruited. Participants were eligible to participate if they had at least one  
51 academic year experience of a UK GEM degree course. Students were excluded from  
52 participating if they had had less than one academic year experience, as the research team  
53 felt such students may have had limited experience of medical training and medical  
54 examinations. Snowball sampling was used in this research to gain access to the smaller  
55 RM populations, which can be difficult for researchers to reach.  
56  
57  
58  
59  
60

1  
2  
3  
4  
5 Participation in this research was voluntary. Twenty-one students registered interest and  
6 accepted the invitation to participate. Based on participants' availability, six focus groups,  
7 each of 4-5 multi-cohort students, were then scheduled throughout June – September 2021.  
8  
9

### 10 11 **Data collection methods**

12 Data were gathered in focus groups and group interviews using a semi-structured interview  
13 schedule. Owing to unexpected scheduling changes, one volunteer could not attend any of  
14 the focus groups and as such those scheduled focus groups were more accurately classified  
15 as group interviews as they consisted of 2-3 people. The interview schedule domains (see  
16 appendix 1) were developed after a review of the literature and drew on themes identified in  
17 previous relevant research(15, 17, 24). The interview schedule consisted of open-ended  
18 discussion questions.  
19  
20  
21  
22  
23

24  
25 All interviews were facilitated by either TZ or GW. At each group, participants were  
26 randomly assigned a number and encouraged to address each other by number, to ease  
27 anonymisation during transcription. Participants were asked to self-report their ethnicity  
28 using the 2011 UK Census categories(36).  
29  
30  
31

32  
33 All interviews were held via Microsoft Teams to accommodate the COVID-19 pandemic-  
34 related restrictions. Focus group and group interviews served to support the sharing of  
35 diverse experiences and an interactive exchange of ideas amongst participants(37). Due to  
36 the Microsoft Teams format, interview sizes were purposefully capped at five participants, as  
37 in our experience engagement of participants was difficult to maintain with larger groups.  
38 The same semi-structured protocol was used for all focus groups and group interviews.  
39  
40  
41  
42  
43

44 At the beginning of each focus group/group interview, participants were briefed on the aims  
45 of each interview, thus creating a permissive, agreeable virtual environment, encouraging  
46 participants to communicate freely(37).  
47  
48  
49

50  
51 First-hand narratives were encouraged throughout each discussion, and participants were  
52 prompted to clarify and expand their answers. Participants were encouraged to respond to  
53 others' contributions and, if possible, provide similar or contrasting accounts. Focus groups  
54 averaged sixty minutes and group interviews averaged forty-five minutes.  
55  
56  
57  
58  
59  
60

### **Data processing and analysis**

All the interviews were recorded on Microsoft Teams and transcribed verbatim by two researchers (TZ, GW) using Microsoft Word and Microsoft Stream. Transcripts were re-examined for accuracy and anonymised for analysis. QSR NVivo (Release 1.6.2)(38) software was used to assist with categorisation and management of the data.

Thematic analysis was adopted using Braun and Clarke's six-phase framework(31). All members of the research team read the participant transcripts individually to familiarise themselves with the data. Following a thorough review of all transcripts, initial inductive coding of the first three transcripts was undertaken independently by three researchers (NM, CB, OS). The team discussed the generated codes and collectively agreed a coding framework, which was used to code the entire data set. Research team members (NM, CB, OS) met as a group on several occasions to identify and discuss emerging themes from the coded data. Themes were reviewed and refined through discussions to ensure an accurate reflection of the data. These discussions provided a form of analyst triangulation(39). As NM, CB and OS have distinct academic and professional backgrounds and interests, such discussions enabled considerations of alternative interpretations of the data from a range of perspectives(40). Following a further review, final themes were defined and collectively agreed upon. The Standards for Reporting Qualitative Research (SRQR) guidelines were adopted(41).

### **Patient and public involvement**

This research was undertaken without patient involvement, as it did not directly involve patients as research subjects. Patients were neither invited to comment on the study design nor consulted to interpret the results. Patients were not invited to contribute to the writing or editing of this document for readability or accuracy.

## **RESULTS**

### **Participants**

Twenty medical students participated in the study. Participant demographics are shown in figure 1. Participants were registered on a GEM degree course and therefore held either a minimum of an upper second-class honours undergraduate degree (or overseas equivalent) or a postgraduate degree such as a Master's or Doctoral qualification. Nineteen out of twenty participants were UK home students, schooled in the UK.

1  
2  
3 Data were categorised into three main domains: examples of racial microaggressions; impact  
4 of racial microaggressions and participants' views on tackling racial microaggressions and  
5 building an inclusive medical school environment (figure 2).  
6  
7  
8  
9

### 10 **Experiences of racial microaggressions**

11 All narratives highlighted experiences of racial microaggressions during undergraduate  
12 medical training. Participants reported that racial microaggressions came from numerous  
13 sources, including peers, faculty, and patients. The data were categorised into 7 themes:  
14 'Where are you from?'; 'You're a lot cleverer than you look'; 'Oh, I've got a brown friend'; 'We  
15 were just called One and Two'; 'The Brown Group'; 'You guys look so alike'; and 'Mrs Bibi  
16 Syndrome'.  
17  
18  
19  
20  
21

#### 22 **'Where are you from?'**

23 Most participants described instances of where they were assumed to have been born in a  
24 country abroad. Participants reported that such instances frequently occurred when  
25 interacting with clinicians and patients:  
26  
27  
28  
29

30 *I went to see a patient...and then she was just like, "Oh where are you from?" and I*  
31 *was just like "London." And she was like "No. (P5)*

32  
33 *... in terms of consultants, it's been more of that again, "where are you from? (P4)*

34  
35 *it was just like no you are not British and I, I feel like I've come across that a few*  
36 *times and that could be really uncomfortable. (P11)*  
37  
38  
39

40 Some also remarked that they would be repeatedly asked the same question related to their  
41 heritage, if they initially did not provide the response the questioner wanted:  
42  
43

44 *when you say I'm from like this town or whatever, or I'm from London or whatever*  
45 *and then they are like oh but where are you really from? (P16)*  
46

47 *I feel like that happens so much to me ... and, yeah, they kind of don't accept your*  
48 *first answer that you like say you're from somewhere in England, they're like no, no*  
49 *where are you where you from from? (P17)*  
50  
51

52 Additionally, several students felt a sense of othering as they commented that the repetitive  
53 questioning of their nationality/heritage stemmed from the construction of the normative  
54 medical student as a White person:  
55  
56

57  
58 *there's kind of like an assumption that the normal at medical school is white (P11)*  
59  
60

### **'You're a lot cleverer than you look'**

Participants described experiences in which peers and patients made assumptions of intellectual inferiority. Many reported that patients often questioned their medical student status as well as doubted their clinical and procedural skills' ability:

*I've had certain patients there who have said to both my [clinical partner] and I and we're both of colour, "Oh are you nursing or doctoring?" and just looked really confused that we're medical students. (P3)*

*So, patients been refusing to be seen by me, questioning my ability to take bloods or cannulate or, uh, do procedural stuff that any other student would undergo. (P6)*

*I've also had some people tell me that I'm a lot cleverer than I look, [...] do you know what I mean there's just the [racial] undertone of it (P16)*

Also highlighted was the false assumption held by some White students that their counterparts from RM backgrounds were selected into medical school due to implementation of a racial quota system, rather than based on academic achievement:

*we were discussing like how you get into Med school and [the student began] rolling their eyes and saying yeah, but all these quotas are letting you know people who shouldn't be here, here just because of positive, uh, discrimination (P11)*

In addition to ascription of intelligence based on students' racialised background, there were also assumptions made about students' English language proficiency. Some students described how it was assumed that English was not their first language, or they had language difficulties:

*And I've also been told I speak English really well, uhm, by nursing staff, as well as patients. (P3)*

*... and they asked if English was my first language and after saying that, what really disturbed me about it since, it was after saying yes, it is my first language, they kind of started to disagree with me and they started to say like oh, are you sure? Are you sure it's your first language? And this was a staff member. This was like a clinical tutor, so that was quite surprising. (P14)*

### **'Oh, I've got a brown friend'**

Some participants felt that faculty and peers did not appreciate or understand the challenges they faced during medical school. Participants reported examples of where their personal experiences of racism and bias were often denied by others:

*I tried to raise that I think, um, with a member of staff in a casual conversation mind, but it was written off as me being too sensitive and, and I feel like a lot of the times where I've tried to raise things, I think because it doesn't meet enough, it doesn't meet the threshold to, for someone to say that it was done with intent, to cause harm,*

1  
2  
3 *people just try to excuse it away as other people being too sensitive have a, if that*  
4 *made, one, two or a few students upset that it doesn't matter. (P11)*  
5  
6

7 *commonly someone would be like, oh, I've got a brown friend and if I were to make a*  
8 *comment about my opinion on it would be like I've got a brown friend that says this*  
9 *and it's like I've got an Indian friend so it just kind of invalidates your opinion because*  
10 *they have a contact who's of an ethnic minority to kind of supersede your opinion.*  
11 *(P13)*  
12  
13

### 14 **'We were just called One and Two'**

15 Perception of difficult names was another common racial microaggression described by  
16 participants. Several students felt a sense of frustration as they commented faculty and  
17 clinicians would often avoid saying their name as they perceived students' names to be  
18 difficult to pronounce:  
19  
20  
21

22 *But if you have a name that's not like English uhm sounding what I find happens is*  
23 *either they, so, so my name is actually like at the top of the alphabet. So I'm always*  
24 *sort of the first person on the roster and, but I end up being on the last person*  
25 *because they can't be bothered to pronounce it or, they're just like right, this is a*  
26 *difficult - they get to the end of it and then they're like "right, this is a difficult*  
27 *one," and then they start with the like slowly pronouncing it then I just, I don't*  
28 *know. I put them out of their misery. (P2)*  
29  
30  
31

32 *But once at med school, you, it's so commonly done that I just blurt out "this is my*  
33 *name." ... I always apologize, which is such a weird thing to do because there is*  
34 *nothing to be sorry about. Uhm and for example, like I've even had a consultant a*  
35 *couple of weeks ago, naming me and my CP [clinical partner] "One" and "Two." And I*  
36 *was like my CP's name is even shorter than mine and we were just*  
37 *called "One" and "Two" throughout the whole day ... I'd never experienced that and I*  
38 *was a bit like you know, we don't have long names and it would probably be easier to*  
39 *just call us by names. (P4)*  
40  
41  
42  
43

44 One student described how they changed their name to avoid experiencing this racial  
45 microaggression and to stop feeling exasperated:  
46

47 *I changed my name well, I moved my first name, my middle name back to my uh,*  
48 *sorry. I changed my name specifically because I was frustrated with people*  
49 *pronouncing my name wrong, so I don't get it a lot anymore with my first name.*  
50 *But with my, my surname, I get it a lot like. They always, it's always being*  
51 *misspelt even though it's, it's quite phonetic and it's quite simple. They'll add an extra*  
52 *letter or take away an extra letter or look at it and be like "oh that's a strange*  
53 *surname" and I'm just like it really isn't, it's just a surname. (P5)*  
54  
55  
56  
57  
58  
59  
60

1  
2  
3 Additionally, participants explained that faculty and peers would frequently mispronounce  
4 their name, often trying to shorten, substitute or anglicize it without their permission. Many  
5 found this alienating and impeding to build relationships with others:  
6  
7

8 *I don't personally feel that I have a very difficult name to pronounce. But often*  
9 *various members of staff have really stumbled with my name and kind of like rolled*  
10 *their eyes and then I've had one member of staff suggest a nickname for me, like*  
11 *they've shortened my name for me and they're like "Can I just call you...?" and it's*  
12 *like, no, my name literally has 6 letters, it's very easy to pronounce. Uhm and it's just*  
13 *the way that they just act like it's such a struggle for them to pronounce your name*  
14 *and it's such an extra task for them. (P3)*  
15  
16

### 17 **'The Brown Group'**

18 Many participants expressed experiences of group labelling, by their peers, based on their  
19 perceived racial appearance. Some students felt devalued and dehumanised by their peers  
20 as less effort was made to identify each person individually:  
21  
22  
23

24 *And then another occasion is where I've been sat with two other students who*  
25 *were uhm of colour and one of us had dropped our University ID card. And they*  
26 *bought the University ID card over and were like "Oh, this is one of yours." Even*  
27 *though the University ID had a picture of the person on it. ... their flippant attitude*  
28 *of "this is just one of yours" and then just giving it to us, they couldn't even be*  
29 *bothered to address us by name or give it to the person whose picture it was (P1)*  
30  
31

32 *in my year ... we are somehow known as the "Brown Group" ... that's how we're*  
33 *referred to and I was like, when someone said it to my face, I was just like "What do*  
34 *you mean Brown Group?" And they're like "yeah, yeah, you know all of you brown*  
35 *people." And I was like how, how is that normal to refer to a group of individuals as*  
36 *the "Brown Group? (P4)*  
37  
38

39 *I've had people refer to [us] as coloured people (P18)*  
40  
41

### 42 **'You guys look so alike'**

43 Misidentification was frequently reported by participants. Most students described  
44 experiences in which peers and faculty had difficulty distinguishing between them and other  
45 students from similar RM backgrounds. Moreover, some students reported instances of  
46 mistaken identity by clinicians whilst on their clinical placements:  
47  
48  
49

50 *And so a couple of occasions I've had where I walked into a room and was called the*  
51 *name of another Brown girl with curly hair and I addressed it straight up. I was*  
52 *like ... "I'm not that person. We're just both mixed race and have curly hair" ... But*  
53 *like yeah, I stood up and let him know that it wasn't ok to call me by*  
54 *this other person's name uhm because actually we don't even look remotely similar.*  
55 *(P1)*  
56  
57  
58  
59

60 *I've had it when I've been, I've scrubbed into theatres uhm and then there was a*



1  
2  
3 registrar. And the only similarity between us was that we were both black  
4 women. And the consultant asked her to go and do something else. So I think she  
5 left the room ... and ... I was standing at the back of the theatre and then she turned  
6 to me and she said "Oh, you're back, that was very quick" and then ... she asked me  
7 to do something and then she only realised when I was like "Oh, I, I can't do that. I'm  
8 not like qualified!" She was like "Oh, it's you, you're a student. You guys look  
9 so alike," and I was just like but we really don't. (P5)  
10  
11  
12

### 13 **'Mrs Bibi syndrome'**

14  
15 Many students talked about experiencing stereotypical slurs, where generalised beliefs about  
16 the behaviour of those from specific racial or ethnic groups were often vocalised by peers,  
17 faculty, and clinicians. Some students remarked that incorrect assumptions were made about  
18 them. This negatively affected their relationships with peers and staff:  
19  
20

21 *I've been called "sassy" quite a bit. I've never been called "sassy" so much until I came*  
22 *to this medical school. I think 'cause ... I'm quite a confident person ... and that's*  
23 *another thing that kind of irks me a bit. (P5)*  
24  
25

26 *"oh what are you having for lunch today, is it you know, rice and curry?" They were*  
27 *like you know, "No, actually I'm having pasta. (P4)*  
28  
29

30 A few students remarked that patients were also subject to negative stereotyping by faculty  
31 members. Such stereotyping reinforced racial bias and led to the further marginalisation of  
32 students from similar RM backgrounds:  
33  
34

35 *I think it was for us in year two, ... one of the lecturers made reference to [a National*  
36 *Health Service Trust] and how a lot of the patients suffer from Mrs Bibi syndrome*  
37 *(P6)*  
38  
39

### 40 **Impact of racial microaggressions**

41  
42 Participants reported various impacts of the racial microaggressions on their daily lives  
43 including their academic learning and performance, and mental wellbeing. These data were  
44 categorised into 6 themes: Feeling uncomfortable and out of place; Feeling guarded; Sense  
45 of doubt; Additional burden; Lack of learning opportunities; and Disengagement from  
46 learning.  
47  
48  
49

#### 50 ***Feeling uncomfortable and out of place***

51  
52 Participants reported a significant impact on their identity and belongingness. The racial  
53 microaggressions they experienced made them uncomfortable, lonely, isolated, and feeling  
54 out of place. While some students became frustrated and disillusioned, others tried to cope  
55 by hiding their personality, trying to fit in and conform:  
56  
57  
58  
59  
60

1  
2  
3  
4  
5  
6  
7  
8  
9  
10  
11  
12  
13  
14  
15  
16  
17  
18  
19  
20  
21  
22  
23  
24  
25  
26  
27  
28  
29  
30  
31  
32  
33  
34  
35  
36  
37  
38  
39  
40  
41  
42  
43  
44  
45  
46  
47  
48  
49  
50  
51  
52  
53  
54  
55  
56  
57  
58  
59  
60

*I would say overall just feeling uncomfortable is a very common feeling I do experience when I do get subjected to microaggressions; being very uncomfortable, feeling very embarrassed and then sometimes, especially on like later reflection and it can even you know, grow into anger and disdain and annoyance. (P18)*

*You kind of, are made to feel so disillusioned and out of place on the course. (P10)*

*And it makes you feel that you have to kind of accommodate others more than they can accommodate you... and so you try and conform as much as possible. (P13)*

### **Feeling guarded**

Students expressed how being in new and different environments leads to feeling worried, anxious, and apprehensive. This was associated with a sense of being 'on guard', which could be exhausting for students:

*I think another thing that I feel personally is I feel quite apprehensive when I'm starting a new placement because I don't know how people are going to perceive me and how they're going to treat me.' (P3)*

*Like whenever we start new things, new rotations, you know how we do so much group work. It's always like oh well, who's going to be saying something and like you're just kind of waiting for the problems to arrive so it leaves you feeling really exhausted. (P11)*

Students explained that this feeling is even more pronounced in small settings, e.g., GP practice and community home visits, making them guarded and unable to relax in the first instance:

*..... it's sort of unfamiliar territory until you get that sense of ease and then you can sort of relax and let your guard down. But up until then, especially on the first meeting, it's always guards up and OK, I'm going to have to uh sort of see what I'm going to have to uhm, not deal with, but sort of go with? (P4)*

*We don't really know what we are walking into and then for a second we're like what if they're really angry or really don't like people from other cultures. It was all fine in the end, but it made us really weary and then it made me realise how dangerous particular community placements can feel .....suddenly I'm sat on someone's sofa that I'd never met before, that a doctor has only knows professionally .....and then I feel like following that, with that experience, whenever I've had to do home visits after that, I felt a bit more weary and it made me realise what kind of danger I could be in if someone suddenly didn't like the look of me. (P11)*

### **Sense of doubt**

The impact of racial microaggressions on emotional wellbeing was evident in participants' narratives. Many students discussed how they frequently had feelings of self-doubt, inadequacy, and questioned whether they were good enough:

*I think you start doubting yourself a little bit. (P15)*

1  
2  
3  
4  
5  
6  
7  
8  
9  
10  
11  
12  
13  
14  
15  
16  
17  
18  
19  
20  
21  
22  
23  
24  
25  
26  
27  
28  
29  
30  
31  
32  
33  
34  
35  
36  
37  
38  
39  
40  
41  
42  
43  
44  
45  
46  
47  
48  
49  
50  
51  
52  
53  
54  
55  
56  
57  
58  
59  
60

*I kept quiet throughout the whole time I was shadowing that registrar only 'cause I felt every time I'm going to say something, what if I pronounce it wrong? What if like the drug name or conditions I say I'm going to pronounce it wrong? And I feel like that stopped me from like learning 'cause I feel like once you make mistakes .....his comment about me pronouncing words wrong definitely stopped me from learning that day (P12)*

*You really doubt yourself you overthink it and it just makes you, it makes me feel quite like, second class. Like I said before, like you really have to uhm, like I don't know, like you're not good enough, and sometimes it just because of your race. (P17)*

### **Additional burden**

Additional burden refers to the extra worry, stress, apprehension, and pressure that participants reported experiencing. This was perceived to be over and above that experienced by white majority students and associated with experiencing microaggressions and constantly needing to prove themselves. This ultimately led to stress and, feeling exhausted, as reflected in the following:

*It is another kind of added layer to the stress that we already have and I think personally for me, I just quite, find it quite exhausting. ...yeah but when it happens constantly, it's like breaking, it's like trying to hammer through a wall and you just keep doing constantly, constantly, eventually it's going to break (P5)*

*it's just something else for you to worry about experiencing these microaggressions and how people are viewing you differently. It's just something else to worry about on top of everything else that I'm guessing a lot of people not from ethnic minorities don't have to worry about. (P1)*

*...having that extra pressure on you in a field that's already quite like high intensity uhm, can be a lot. (P9)*

### **Lack of learning opportunities**

Lack of learning opportunities was one of the key ways racial microaggressions appeared to impact students' learning. These denials of opportunities occurred in various contexts including not being able to practise clinical skills, no invitations to study groups, to share resources, or to attend social learning events. The outcome of these were poor and negative student learning experiences as reflected in the following:

*Feeling like my white [clinical partner] kind of gets questioned a little bit more. And I know we all hate being questioned by consultants, but I actually do find it useful sometimes so I would like some questions to be directed my way. But it feels like they kind of questioned her more and put her forward to kind of do histories and things before me, even though I am very willing to. (P1)*

*So I had a placement in Obs and Gynae [Obstetrics and Gynaecology] at some point in second year. I was actually really excited to go in and see a C-section [caesarean*

1  
2  
3 section] for the first time. Uhm, and so there was me and another student and I was,  
4 you know, the brown girl. And there was a White girl in the room as well. And  
5 the White girl was the same grade as me, same year as me. We knew each other  
6 and she was allowed to kind of assist and do like parts of the procedure and when  
7 the obstetrician walked in she kind of just looked at me and she was like “who are  
8 you?” And I was like “oh I’m the other Med Student.” She didn’t even dignify me with a  
9 verbal response. She kind of just pointed me out the room which was really  
10 demeaning. But like the fact that she couldn’t even verbalise what she was saying to  
11 me because I was that much beneath her was really insulting (P8).

12  
13  
14 Often patients are more agreeable in being seen by them (white students) and  
15 having procedures done by them. (P6)

16  
17 In second year, me and some of my other friends who had to resit were then finding  
18 out about all these resources that were going around in like other friendship  
19 groups. which didn’t really have like BME people in those friendship groups. And it  
20 does make you wonder, like how, how we’d been excluded from those  
21 kind of, like, not circles, but that sharing of resources. And additionally, I think when it  
22 came to, to resits, it was quite noticeable, just like how many people from BME  
23 backgrounds were there resitting the exam. I do think that how resources are shared  
24 amongst certain groups could have had an impact on a lot of, or had an impact on  
25 the distribution of the people who had to resit (P9)

### 26 27 **Disengagement from learning**

28  
29 Impact on students’ learning manifested as a key area affected by racial microaggressions.  
30 Students reported how disengagement from learning contributed significantly to this. This  
31 was due to the culmination of experiences as discussed in the themes reported above: lack  
32 of and inequitable learning opportunities, additional burdens, feeling uncomfortable and out  
33 of place. All these experiences led to disengagement from learning which included students  
34 not fully applying themselves, reduced attendance and reduced performance resulting from  
35 being made to feel like an outsider and unwanted. These impacts on RM students’  
36 engagement with learning were from a range of groups including peers, patients,  
37 supervisors, and healthcare workers:  
38  
39  
40  
41  
42  
43

44  
45 *For me, they, the only thing that it probably makes me feel is that I don’t want to*  
46 *go into placement and I say that .... because that’s a regular feeling anyway. You*  
47 *just think to yourself “I don’t want to have to go through all of this again.” ..... you’re*  
48 *there to learn ultimately, and if you’re going to get this from all sides, that’s not just*  
49 *patients, but you’re gonna get it from healthcare staff as well, it just makes it “well*  
50 *what is the point in me being here? (P20)*

51  
52 *I find a lot, when I’m talking to a consultant or another medical staff member,*  
53 *particularly when I’m with my clinical partner, who is white.... Sometimes I just think,*  
54 *Oh well, they’re not interested in me being here, so I won’t listen and I won’t engage,*  
55 *I won’t kind of apply myself as much as I could, so then obviously, I’m taking less*  
56 *from that experience on placement. (P10)*

1  
2  
3 *But I know for others in my medical school...when they've been sort of made to feel, I*  
4 *guess like an outsider..... they then don't try to seek those opportunities anymore.*  
5 *(P20)*  
6

7 *... that sort of impacted uhm, I guess my performance ..... the fact that I was less*  
8 *inclined to go into placements. (P18)*  
9

## 10 11 **Participants' views on tackling racial microaggressions and building an inclusive** 12 **medical school environment**

13  
14 Participants were asked their views on how racial microaggressions experienced during their  
15 undergraduate training could be tackled by their medical schools and on how medical  
16 schools could build more inclusive environments. Participants' views were categorised into 5  
17 themes: 'Hear it and deal with it'; 'Don't brush it under the carpet'; A thread of student  
18 education; 'Someone like us'; and Shifting the majority culture.  
19  
20  
21

### 22 23 24 **'Hear it and deal with it'**

25 Participants identified that often, racial microaggressions observed by faculty members were  
26 not challenged at the point in time they occurred. Participants felt strongly that medical  
27 school staff should deal with racial microaggressions 'in the moment', as soon as they  
28 witnessed them:  
29  
30  
31

32  
33 *... like on medical school sites, like the CBL facilitators, hardly ever step in when*  
34 *there's uncomfortable moments and say, well, actually we don't think that should*  
35 *happen or that shouldn't be said. And often it's like kind of, if it's dealt with at all, it's*  
36 *never in the moment ... if they're teaching a session or leading a session or group*  
37 *work, if a comment is made, and they hear it, they need to deal with it straight away.*  
38 *(P11)*  
39

40 *...it's almost too late then to act in retrospect. And I think they need to put more in*  
41 *place. So it's. Being proactive rather than just reactive (P10)*  
42

43 Training staff to 'hear it and deal with it' in the moment was identified as a strategy to help  
44 staff respond proactively to these situations:  
45  
46

47 *... but more staff training, so I think we spoke briefly about earlier how the impact*  
48 *when staff don't act as allies or when staff let comments go unchallenged or stuff.*  
49 *And let, sort of these racist, racist or racial narratives, run through different settings.*  
50 *Things I think, if the staff and particularly clinical staff too have some sort of training*  
51 *about how to be an ally for all different groups of minorities. (P10)*  
52  
53

### 54 55 **'Don't brush it under the carpet'**

56 Closely associated with the theme above was the strongly held view that people's  
57 experiences of racial microaggressions should not be 'brushed under the carpet'. Rather,  
58 they should be openly acknowledged, and strategies put in place to challenge them:  
59  
60

1  
2  
3  
4 ... it would be nice if they acknowledged the problem as it is or demonstrated some  
5 understanding of the challenges that we face. (P6)  
6

7 ... just acknowledging that these are things that happen and not kind of brushing it  
8 under the carpet, 'cause we all know [name of Medical School] has a habit of just  
9 hiding their problems. (P8)  
10

11  
12 Some participants expressed that the responsibility for calling out racial microaggressions  
13 should not be left to RM students, who were already trying to navigate these difficult  
14 situations in addition to their studies. A medical school '*where people call out these [racial]*  
15 *microaggressions ... would definitely improve our medical school experience*'. Suggestions  
16 included having an identified person responsible for speaking up about microaggressions  
17 was a possible solution, for example a senior member of the medical school or a 'speak up'  
18 guardian. The idea of other students and staff being trained to act as allies or active  
19 bystanders was evident in participants' discourses.  
20  
21  
22  
23  
24

### 25 26 **'Someone like us'** 27

28 As noted earlier, participants frequently identified that as RM students, they felt they were  
29 learning to be doctors in a majority white environment and culture. A strong theme in  
30 participants' discourses was the need for more faculty members and students 'like us' from  
31 RM backgrounds. Participants reported that, in their experience, very few academic and  
32 faculty members were from RM groups. Extending the number of faculty members from RM  
33 groups was viewed as central to building an inclusive medical school.  
34  
35  
36  
37  
38

39 Faculty members from RM backgrounds were identified as people that could understand the  
40 challenges that RM students faced. They were also people that participants said they felt  
41 more comfortable sharing experiences with or going to for support. The idea of 'having  
42 mentors that have been through similar difficulties and understood what it is like to be a BME  
43 student was also raised:  
44  
45  
46  
47

48 ... an increased number of medical staff from a minority background would be useful,  
49 'cause I think at the moment we have like the one who is kind of responsible for like  
50 everything and I know it's, it probably is a lot of pressure on, on his head because  
51 now everything that happens with anyone, they, they kind of feel like he's the only  
52 person that they can talk to, so. (P8)  
53

54 Because I agree like if we had someone to talk to as well but who is like us, like us  
55 being like minority. If we had someone to talk to who is similar to us that would just  
56 be so much, so much help. (P13)  
57

58 ... someone mentioned earlier about diversifying the staff. I think that's something that  
59 would genuinely really be helpful, but in, in also in the, in terms of having mentors  
60

1  
2  
3 *that have been through it and understood what it's like to be a BME student. I, I often*  
4 *find that there are consultants, for example, who are BME who are able to support*  
5 *you and take the time to understand what you need better than some of the staff at*  
6 *the medical school. (P6)*  
7

8  
9 Having more peers from RM groups was also identified as central to building inclusive  
10 medical schools. Participants frequently commented that there should be more students  
11 'like us' on medical school programmes and it was a commonly perception that there were  
12 proportionally less students from RM backgrounds were selected via admissions processes.  
13  
14

15  
16 *... I think first and foremost what I would say, and it might not be possible, but just a*  
17 *more diverse cohort ... (P13)*  
18

19 Several participants also highlighted the value of peer mentorship schemes that provided  
20 RM students with peer support networks:  
21

22  
23  
24 *I was just going to say one scheme that I think has really helped, that I think has*  
25 *been set up by students more than anything else, is the BME mentor scheme. (P14)*  
26

27  
28 *That was my only outlet, was the BME mentor, and also I applied for I don't know*  
29 *number 2 with your mentor, I applied for like you know the general mentors I put*  
30 *please, if possible you can they like be BME, and I did, and so my general parents*  
31 *from Med school. Anyway, my parents were BME, they were all Asian, so it kind of*  
32 *helped. And then I had [student name] as well as my sibling. So it was really nice,*  
33 *that was, that was the only thing that was kind of a godsend. (P13)*  
34

### 35 **A thread of student education**

36  
37 Racial microaggressions from other students were commonly reported and participants  
38 voiced strongly that ongoing diversity, inclusivity, and anti-racism education for students was  
39 central to tackling microaggressions and building inclusive medical schools. Although  
40 participants often appreciated the one-off diversity or anti-racism sessions provided by their  
41 medical schools, they felt that learning opportunities needed to be compulsory and threaded  
42 throughout the medical education programme:  
43  
44  
45

46  
47  
48 *... we had a, a talk on melanin medics at the beginning of the year and, and it was*  
49 *just basically they, I think they were talking about microaggressions and stuff like that*  
50 *and how uhm, how common it is and the, the impacts on people of colour. Um and it*  
51 *was just one talk and I feel like if they had maybe a few more throughout the year*  
52 *and if it was kind of more of a widespread thing, I think that could be really beneficial.*  
53 *(P17)*  
54

55  
56 *Yeah, I think like just making these things compulsory and not just like didactic*  
57 *lectures like having some sort of back and forth engagement so you know the*  
58 *student on the other side is actually engaging with what's being taught, and is*  
59 *actually kind of participating in the material, if that makes sense. (P14)*  
60

1  
2  
3 Although an ongoing education programme was seen as important, there was a recognition  
4 that tackling racial microaggressions and building a more inclusive medical school required  
5 structural changes within medical schools.  
6  
7  
8

### 9 **Shifting the majority culture**

10 Participants expressed that action needed to be taken at the organisational level of medical  
11 schools. As one participant expressed:  
12  
13

14  
15 *... at the bare minimum is to actually have a zero-tolerance policy for students and for*  
16 *staff... (P1)*  
17

18 Participants' accounts highlighted that that there needed to be a shift in the majority culture  
19 so that racial microaggressions or any forms of racism were unacceptable:  
20  
21  
22

23 *So, I think the problem isn't usually with the medics like themselves, or at least the*  
24 *Med school students overtly. It's usually either with the faculty or the patients ... (P15)*  
25

26 *Uhm, I think beyond training, uh, a structural thing or an organisation thing that needs*  
27 *to be put on as an actual policy about how to deal with these kinds of situations,*  
28 *because there isn't one. (P2)*  
29

30 Shifting the majority culture involved widespread changes, including the introduction of  
31 policies at university and NHS Trust level that held people to account if their behaviour was  
32 unacceptable. Additionally, student-friendly complaints policies for reporting racist  
33 encounters, decolonising the curriculum, and creating a culture within which people are able  
34 to speak up feel confident and supported to challenge other people's views and behaviours  
35 were seen as important.  
36  
37  
38  
39

## 40 **DISCUSSION**

### 41 **Principal findings**

42 This qualitative study of UK GEM students from RM backgrounds has provided a greater  
43 understanding of the racial microaggressions experienced by medical students and its  
44 impact on learning and academic performance. Racism, including microaggressions, in  
45 medical education is an important yet under-explored area. This study, to our knowledge, is  
46 the first to explore the racial microaggressions experienced by UK GEM students and offers  
47 key insights into the daily experiences of RM students. It has revealed participants'  
48 experiences of racial microaggressions during their undergraduate training. Seven types of  
49 racial microaggressions were reported by students, including assumptions of being foreign,  
50 assumptions of intellectual inferiority, denials of racial experiences, group labelling,  
51 misidentification, and stereotyping.  
52  
53  
54  
55  
56  
57  
58  
59  
60



1  
2  
3  
4  
5 Most students reported that regular experiences of racial microaggressions negatively  
6 impacted, directly and indirectly, on their learning, academic performance, and well-being.  
7 Participants' narratives indicated how experiences of racial microaggressions from peers,  
8 faculty, clinicians, and patients led to difficulties navigating their learning environments.  
9 Students frequently reported feeling uncomfortable and out of place in teaching sessions  
10 and clinical placements. Students also discussed feeling invisible and ignored in placements  
11 and not being offered the same learning opportunities as their white counterparts. This led to  
12 poor access to learning experiences and disengagement from learning. Many participants  
13 described how being from a RM background was associated with feelings of apprehension  
14 and having their 'guards up', particularly at the start of new clinical placements. This was  
15 perceived to be an additional mental burden that they felt was not experienced by their white  
16 counterparts.  
17  
18  
19  
20  
21  
22  
23  
24

25 Additionally, participants suggested interventions they felt would promote inclusivity and  
26 develop a sense of belonging within medical schools. Students suggested that staff required  
27 training to enable them to recognise and deal effectively with racial microaggressions in the  
28 classroom 'in the moment' they occurred. They felt strongly that their medical education  
29 curricula should include a programme of anti-racism training and critical consciousness  
30 education to promote meaningful understandings about diversity, racism, and other forms of  
31 social inequality. Participants highlighted how student and staff populations should be further  
32 diversified with increased representation of different racial and ethnic minorities. Having  
33 more RM faculty members, who students felt they were more likely to go to for support, was  
34 seen as particularly important. Participants also proposed encouraging open conversations  
35 around race to improve understanding of the experiences RM students encountered and  
36 improve peer and staff relations. Furthermore, it was recognised that while other changes  
37 would be helpful, to shift the majority culture, changes were required at the institutional level  
38 of medical schools.  
39  
40  
41  
42  
43  
44  
45  
46  
47  
48

49 This study makes a significant contribution to the literature by building upon previous  
50 research(15, 17, 20, 42), and theorising about the causes of academic underperformance in  
51 RM students. This study documents how GEM medical students in the UK experience racial  
52 microaggressions and importantly, provides in-depth data on how these impact on their  
53 learning. Some of the findings from this study align with previous studies of racial  
54 microaggressions in medical education. For example, the experiences of racial  
55 microaggressions occurred in both the clinical and non-clinical settings(21). These were  
56 similar to those reported in other studies, such as querying students' country of origin(7),  
57  
58  
59  
60

1  
2  
3 mispronouncing names(23), assuming lower level of intellect compared to peers(15, 20),  
4 mistaken identity(7, 20, 23), hyper-vigilance to threats of racism(22) , and being ignored(7,  
5 20).  
6  
7

8  
9 The impact of racial microaggressions has been alluded to in previous literature, for example  
10 having a negative impact on learning(15, 20), feelings of isolation, disengagement(43),  
11 experiencing an additional burden(15), and fewer clinical opportunities(7). However, a key  
12 tenet of our study compared to other studies is that its qualitative methodology and  
13 recruitment of students from medical schools across the UK, generated in-depth accounts  
14 from participants that shed light on the pathway from experiences of microaggressions to  
15 lower academic attainment via damaging impacts on learning. Most other studies have failed  
16 to provide such in-depth narratives due to the adoption of survey methods and some are  
17 limited due to accounts from students in single medical schools only.  
18  
19  
20  
21  
22  
23

24  
25 Previous studies in both the general and student populations have found the additional  
26 burden of racial microaggressions increases worry and lowers self-esteem(44) and can  
27 affect mental health and psychological wellbeing(45-47). However, in our study compared to  
28 some others, although mental wellbeing impacts were implied, impacts on mental health  
29 were not specifically investigated. Some studies that have utilised validated measures of  
30 mental health have been able to explore the association between racial microaggressions  
31 and depression(17) and burnout(20).  
32  
33  
34  
35  
36  
37

38 While most studies make recommendations for reducing microaggressions and racist  
39 experiences, students' views on strategies and policies for change are not well documented.  
40 Medical students in Ackerman-Barger et al's US study(15) highlighted the importance of  
41 promoting diversity and allyship, curriculum reform, open conversations, and safe spaces.  
42 Our study of UK GEM students identified similar themes but additionally, highlighted the  
43 importance of 'hear it and deal with it [microaggressions]' in the moment, at the point that  
44 they occur. It also emphasised the need to 'shift the majority culture, with institutional  
45 change from the top to the bottom of the medical school.  
46  
47  
48  
49  
50  
51

## 52 **Strengths and weaknesses**

53 A qualitative approach elicited in depth explorations of participants' experiences. The use of  
54 online focus groups and group interviews encouraged frank responses and recollection was  
55 facilitated through discussion. Historical recollections may have been influenced by recall  
56 bias; such bias cannot be eliminated but measures, such as careful interview design,  
57 backwards recall, and follow-up questions on a specific event, were incorporated to minimise  
58  
59  
60

1  
2  
3 its impact(48, 49). Participants were able to build upon others' responses, providing further  
4 understanding of experiences and perspectives. Multiple cohorts from several UK medical  
5 schools participated in this study. This enabled the data to elicit narrative experiences from  
6 GEM students at various stages of undergraduate training.  
7  
8  
9

10  
11 Although recruitment of this study was targeted nationally, the largest proportion of study  
12 participants came from the same geographical region in the UK. This region, however, has  
13 the largest number of GEM students in the UK. As a result, the experiences described in this  
14 study may best reflect a specific region of the UK, which may restrict the transferability of the  
15 results. There was a greater predominance of female participants in our research (M:F 1:3),  
16 but RM groups were well represented. This may limit result transferability to male medical  
17 students; however, we note that intersectionality between multiple identities including  
18 ethnicity and gender are likely to impact attainment in medicine(50). Moreover, we did not  
19 note any significant differences between the gender and ethnic groups in their reported  
20 experiences. Although, we have reported RM students as a collective group, we recognise  
21 that individuals are not homogenous.  
22  
23  
24  
25  
26  
27  
28  
29

30 All interviews were conducted online via Microsoft Teams due to the safety restrictions  
31 imposed by the COVID-19 pandemic. This may have affected the rapport between the  
32 researchers and participants. While conducting the fieldwork online could be said to limit  
33 interactions between participants, it had the advantage of facilitating discussions between  
34 students from different areas of the country, which would have been difficult if face-to-face.  
35 Additionally, the presence of others in the group setting may have led some participants  
36 fearful of expressing certain views or sharing sensitive personal experiences, whilst others  
37 may have dominated interviews and thus some topics may have been less discussed.  
38 Because the themes that emerged from the data were reliant on the chosen sample,  
39 alternative themes may have developed if the study had included more or different  
40 participants. Furthermore, participants may have had specific motives for participating, which  
41 may have influenced the topics that emerged in the group interviews.  
42  
43  
44  
45  
46  
47  
48  
49

50 The use of participant validation, asking participants to feedback on data interpretations and  
51 analysis, was considered(40, 51). However, it was decided that participant validation was  
52 not appropriate for a few reasons. Firstly, due to the power imbalance between academic  
53 members of the research team and participants, participants may have felt pressured to  
54 agree with our interpretations even if they disagreed(51). Secondly, we were mindful of the  
55 additional demands placed on participants' time reading drafts could cause and the potential  
56 distress reading some of the content of transcripts could cause; and thirdly, participant  
57  
58  
59  
60

1  
2  
3 validation is thought to be least useful in studies where one-off data collection exercises  
4 have occurred(40).  
5  
6  
7

8 Using reflexivity, the interviewers' identity characteristics, such as gender and race, as well  
9 as their status as fellow medical students, may have influenced the participants' discussion  
10 on specific topics. Participants' perceptions of the interviewers may have made them feel  
11 more at ease while discussing personal and sensitive topics. Other participants, on the other  
12 hand, may have found it difficult to explore some issues in depth with a fellow student. While  
13 such influence cannot be quantified, and no participant expressed discomfort in discussing  
14 their experiences due to the interviewers' traits, it is still a possibility. It is also possible that  
15 individual research team's experiences of medical education impacted data interpretation.  
16  
17  
18  
19  
20  
21

22 As with other qualitative studies, generalisability is an inherent difficulty(52) and thus cannot  
23 be claimed. The aim of this study was not to provide generalisations, but to provide an  
24 exploration of the topic, with a view to inform future research and inform all medical  
25 education stakeholders.  
26  
27  
28  
29

### 30 **Implications of the study**

31 All medical students need a supportive, inclusive environment to learn and perform  
32 successfully. However, this can be difficult for RM students due to several factors. The high  
33 prevalence of racial microaggressions is evident. Racial microaggressions were easily  
34 recalled by students and they felt that these microaggressions negatively impacted their day-  
35 to-day experiences. Students were able to provide a variety of examples, which involved  
36 patients, faculty, peers, and clinicians. The racial microaggressions experienced were not  
37 isolated occurrences but instead, regularly occurred throughout students' undergraduate  
38 medical school journey. This repetitive nature could explain the additional mental burden  
39 students described, impeding both their wellbeing and ability to learn and perform well. Our  
40 work adds weight to the cognitive load theory, highlighted by Ackerman-Barger et al.(15),  
41 where the cognitive impact associated with microaggressions cumulatively builds up over  
42 time and impairs productivity, mental function, and relationships, impacting on RM students'  
43 learning, performance, and progression.  
44  
45  
46  
47  
48  
49  
50  
51  
52  
53

54 Our findings suggest that more needs to be done to support RM students and increase  
55 faculty's awareness of the difficulties they face. Both tailored student support for  
56 marginalised students and environments that foster inclusion, have been identified as  
57 potential factors to facilitate academic success(53, 54). Moreover, diversifying faculty is  
58  
59  
60

1  
2  
3 likely to assist with student support, develop a more inclusive environment, and may help  
4 increase awareness of the different forms of racism.  
5  
6  
7

8 The prevalent belief that faculty had a general lack of awareness of this form of racism does  
9 not mean that medical schools were not starting to make progress on tackling race-related  
10 issues; however, our findings indicate that medical schools need to be more proactive in  
11 their anti-racist pedagogy and interventions. A lack of a systematic approach and consistent  
12 education on racial inequities and the effects of racism in the clinical environment was noted  
13 in this study. This suggests a need for strategic change and policy initiatives at all levels,  
14 including overarching institutional bodies, education and training councils and medical  
15 schools themselves. In the UK, the Medical Schools Councils' Equality, Diversity and  
16 Inclusion Alliance was recently formed with the specific aim to provide practical guidance to  
17 support medical schools to become fair, diverse and inclusive environments in which to  
18 study and work(55). We believe that an iterative component of the medical curriculum,  
19 specifically focused on equality, diversity and inclusion (EDI) issues should be developed,  
20 thus ensuring a number of key EDI topics are regularly revisited throughout the course so  
21 that students develop a critical consciousness(56) about diversity and race-related issues.  
22 Moreover, guidance on how to deal with racism in the clinical environment as well as  
23 effective response strategies needs to be developed, to empower both recipients and  
24 bystanders. Furthermore, this and other studies suggests that medical schools should also  
25 review their anti-racism training for faculty.  
26  
27  
28  
29  
30  
31  
32  
33  
34  
35  
36  
37

38 A lack of institutional accountability and policy enforcement by faculty were highlighted in  
39 this study and could dissuade students from reporting incidents and seeking support,  
40 therefore affecting their wellbeing and student experience. Our findings suggest that, in  
41 addition to training faculty and students, institutions should be dealing with student-reported  
42 race-related experiences in a timely manner. This will likely restore students' trust in  
43 institutions, increase transparency and contribute towards creating equitable, inclusive  
44 learning environments for all students to thrive in. In the UK, small steps have been taken to  
45 address institutional accountability, for example, the introduction of BMA Racial Harassment  
46 Charter(57) and Advance HE Race Equality Charter(58).  
47  
48  
49  
50  
51  
52  
53

#### 54 **Future research**

55 This study highlights a gap in the medical education research literature related to  
56 understanding the impact of racism on students' educational experience, learning and  
57 academic performance. Further research is needed to critically examine models and  
58 interventions tackling racial microaggressions as well as exploration of institutional efforts to  
59  
60

1  
2  
3 build inclusive learning environments within medical education. Exploration of other types of  
4 microaggressions based on protected characteristics, such as religion, sex, sexual  
5 orientation and disability and their impact on medical students' mental health, learning,  
6 academic performance, and retention would make worthy contributions to the field. This  
7 could be explored further by examining the impact of microaggressions and discrimination  
8 based on intersecting social identities, e.g., Black and female. Research into students and  
9 doctors' experiences of inclusion as well as institutional processes for promoting equity,  
10 diversity and belonging needs to be carried out.  
11  
12  
13  
14  
15

## 16 **CONCLUSION**

17  
18 This is the first study exploring UK GEM students' experiences of racial microaggressions. It  
19 extends current knowledge of medical students' experiences of microaggressions and their  
20 impact on students' attainment, highlighting how these impacts are evident in an education  
21 and health care system beyond the US. In this study, students from RM backgrounds  
22 reported recurrent experiences of racial microaggressions that impeded their learning,  
23 academic performance, and well-being. Efforts and future interventions focusing on  
24 institutional changes to diversify student and staff populations; encouraging open,  
25 transparent conversations around race; and promptly managing any student-reported racial  
26 experiences are likely to be key to shift the culture to proactively foster inclusive learning  
27 environments. As more students from RM backgrounds enter the medical profession,  
28 educators should actively aim to remove barriers to learning by supporting students to thrive  
29 and reach their full academic potential. Institutions have a responsibility to directly address  
30 all forms of racism, including microaggressions. This study highlights salient issues to be  
31 considered by all stakeholders of medical education.  
32  
33  
34  
35  
36  
37  
38  
39  
40  
41  
42  
43  
44  
45  
46  
47  
48  
49  
50  
51  
52  
53  
54  
55  
56  
57  
58  
59  
60

1  
2  
3 **Funding:** 'This research received no specific grant from any funding agency in the public,  
4 commercial or not-for-profit sectors'.  
5  
6  
7

8 **No competing interests:** "All authors have completed the ICMJE uniform disclosure form at  
9 [www.icmje.org/coidisclosure.pdf](http://www.icmje.org/coidisclosure.pdf) and declare: no support from any organisation for the  
10 submitted work; no financial relationships with any organisations that might have an interest  
11 in the submitted work in the previous three years; no other relationships or activities that  
12 could appear to have influenced the submitted work."  
13  
14  
15  
16

17 **Author contributions:** NM conceived of the research project. NM designed the research  
18 project under the supervision of CMB. TZ and GW collected the data. NM, CMB and OS  
19 analysed the data. All authors interpreted the data. NM, TZ, OS and CMB wrote the first  
20 draft of the article, and all authors revised it critically for important intellectual content. All  
21 authors approved of the final version to be published. NM is the guarantor.  
22  
23  
24  
25  
26

27 **Ethical approval:** Ethical approval was granted by The University of Warwick Biomedical  
28 and Scientific Research Ethics Committee (BSREC 17/20-21)  
29  
30  
31

32 **Participants consent:** All participants gave informed consent.  
33  
34

35 **Data sharing statement:** No additional data are available as data are held in safe haven.  
36  
37

38 **Provenance and peer review:** Not commissioned; externally peer reviewed.  
39  
40

41 **Transparency statement:** NM affirms that the manuscript is an honest, accurate, and  
42 transparent account of the study being reported; that no important aspects of the study have  
43 been omitted; and that any discrepancies from the study as originally planned (and, if  
44 relevant, registered) have been explained.  
45  
46  
47  
48  
49  
50  
51  
52  
53  
54  
55  
56  
57  
58  
59  
60

## References

1. Woolf K. Differential attainment in medical education and training. *BMJ*. 2020;368:m339.
2. Woolf K, McManus IC, Potts HW, Dacre J. The mediators of minority ethnic underperformance in final medical school examinations. *Br J Educ Psychol*. 2013;83(Pt 1):135-59.
3. McManus IC, Richards P, Winder BC, Sproston KA. Final examination performance of medical students from ethnic minorities. *Med Educ*. 1996;30(3):195-200.
4. Wass V, Roberts C, Hoogenboom R, Jones R, Van der Vleuten C. Effect of ethnicity on performance in a final objective structured clinical examination: qualitative and quantitative study. *BMJ*. 2003;326(7393):800-3.
5. Fyfe M, Horsburgh J, Blitz J, Chiavaroli N, Kumar S, Cleland J. The do's, don'ts and don't knows of redressing differential attainment related to race/ethnicity in medical schools. *Perspect Med Educ*. 2022;11(1):1-14.
6. Sue DW, Capodilupo CM, Torino GC, Bucceri JM, Holder AM, Nadal KL, et al. Racial microaggressions in everyday life: implications for clinical practice. *Am Psychol*. 2007;62(4):271-86.
7. Kristoffersson E, Rönqvist H, Andersson J, Bengs C, Hamberg K. "It was as if I wasn't there" – Experiences of everyday racism in a Swedish medical school. *Social Science and Medicine*. 2021;270.
8. Smith WA, Franklin JD, Hung M. The Impact of Racial Microaggressions Across Educational Attainment for African Americans. *Journal of Minority Achievement, Creativity, and Leadership*. 2020;1(1):70-93.
9. Nadal KL, Wong Y, Griffin KE, Davidoff K, Sriken J. The adverse impact of racial microaggressions on college students' self-esteem. *Journal of college student development*. 2014;55(5):461-74.
10. Suárez-Orozco C, Casanova S, Martin M, Katsiaficas D, Cuellar V, Smith NA, et al. Toxic Rain in Class: Classroom Interpersonal Microaggressions. *Educational Researcher*. 2015;44(3):151-60.
11. Kohli R, Solórzano DG. Teachers, please learn our names!: racial microaggressions and the K-12 classroom. *Race Ethnicity and Education*. 2012;15(4):441-62.
12. Harwood SA, Hunt MB, Mendenhall R, Lewis JA. Racial microaggressions in the residence halls: Experiences of students of color at a predominantly White university. *Journal of Diversity in Higher Education*. 2012;5(3):159.
13. Huynh VW. Ethnic microaggressions and the depressive and somatic symptoms of Latino and Asian American adolescents. *Journal of youth and adolescence*. 2012;41(7):831-46.
14. Sue DW. *Microaggressions in everyday life: Race, gender, and sexual orientation*: John Wiley & Sons; 2010.
15. Ackerman-Barger K, Boatright D, Gonzalez-Colaso R, Orozco R, Latimore D. Seeking Inclusion Excellence: Understanding Racial Microaggressions as Experienced by Underrepresented Medical and Nursing Students. *Acad Med*. 2020;95(5):758-63.
16. Ackerman-Barger K, London M, White D. When an Omitted Curriculum Becomes A Hidden Curriculum: Let's Teach to Promote Health Equity. *Journal of Health Care for the Poor and Underserved*. 2020;31(4):182-92.



17. Anderson N, Lett E, Asabor EN, Hernandez AL, Nguemeni Tiako MJ, Johnson C, et al. The Association of Microaggressions with Depressive Symptoms and Institutional Satisfaction Among a National Cohort of Medical Students. *J Gen Intern Med.* 2022;37(2):298-307.
18. Brown C, Daniel R, Addo N, Knight S. The experiences of medical students, residents, fellows, and attendings in the emergency department: Implicit bias to microaggressions. *Aem Education and Training.* 2021;5:S49-S56.
19. Bullock JL, O'Brien MT, Minhas PK, Fernandez A, Lupton KL, Hauer KE. No One Size Fits All: A Qualitative Study of Clerkship Medical Students' Perceptions of Ideal Supervisor Responses to Microaggressions. *Academic Medicine.* 2021;96(11S):S71-S80.
20. Chisholm LP, Jackson KR, Davidson HA, Churchwell AL, Fleming AE, Drolet BC. Evaluation of Racial Microaggressions Experienced During Medical School Training and the Effect on Medical Student Education and Burnout: A Validation Study. *Journal of the National Medical Association.* 2021;113(3):310-4.
21. Espallat A, Panna DK, Goede DL, Gurka MJ, Novak MA, Zaidi Z. An exploratory study on microaggressions in medical school: What are they and why should we care? *Perspect Med Educ.* 2019;8(3):143-51.
22. Kristoffersson E, Hamberg K. "I have to do twice as well" - managing everyday racism in a Swedish medical school. *Bmc Medical Education.* 2022;22(1).
23. Strayhorn TL. Exploring the Role of Race in Black Males' Sense of Belonging in Medical School: A Qualitative Pilot Study. *Medical Science Educator.* 2020;30(4):1383-7.
24. Morrison N, Machado M, Blackburn C. Student perspectives on barriers to performance for black and minority ethnic graduate-entry medical students: a qualitative study in a West Midlands medical school. *BMJ Open.* 2019;9(11):e032493.
25. Equality & Human Rights Commission. What equality law means for you as an education provider – further and higher education: Equality and Human Rights Commission; 2014 [Available from: [https://www.equalityhumanrights.com/sites/default/files/what\\_equality\\_law\\_means\\_for\\_you\\_as\\_an\\_education\\_provider\\_further\\_and\\_higher\\_education.pdf](https://www.equalityhumanrights.com/sites/default/files/what_equality_law_means_for_you_as_an_education_provider_further_and_higher_education.pdf).
26. Kumwenda B, Cleland J, Greatrix R, MacKenzie RK, Prescott G. Are efforts to attract graduate applicants to UK medical schools effective in increasing the participation of under-represented socioeconomic groups? A national cohort study. *BMJ Open.* 2018;8(2):e018946.
27. Sarfo-Annin JK. Ethnic inclusion in medicine: the ineffectiveness of the 'Black, Asian and Minority Ethnic' metric to measure progress. *BJGP open.* 2020;4(5).
28. Milner A, Jumbe S. Using the right words to address racial disparities in COVID-19. *The Lancet Public Health.* 2020;5(8):e419.
29. Gunaratnam Y. *Researching Race and Ethnicity.* London 2003. Available from: <https://methods.sagepub.com/book/researching-race-and-ethnicity>.
30. Kaufman DM. Teaching and Learning in Medical Education: How Theory Can Inform Practice. *Understanding Medical Education: Evidence, Theory, and Practice* 2018. p. 37-69.
31. Kiger ME, Varpio L. Thematic analysis of qualitative data: AMEE Guide No. 131. *Med Teach.* 2020;42(8):846-54.
32. Braun V, Clarke V. Using thematic analysis in psychology. *Qualitative Research in Psychology.* 2006;3(2):77-101.
33. Braun V, Clarke V. Thematic analysis. *APA handbook of research methods in psychology, Vol 2: Research designs: Quantitative, qualitative, neuropsychological, and biological.* APA handbooks in psychology®. Washington, DC, US: American Psychological Association; 2012. p. 57-71.

- 1
- 2
- 3
- 4 34. Varpio L, Ajjawi R, Monrouxe LV, O'Brien BC, Rees CE. Shedding the cobra effect: problematising thematic emergence, triangulation, saturation and member checking. *Med Educ.* 2017;51(1):40-50.
- 5
- 6
- 7 35. UK Government. The Equality Act 2010 2010 [Available from: <https://www.legislation.gov.uk/ukpga/2010/15/section/4>].
- 8
- 9 36. UK Government. List of ethnic groups: 2011 Census 2021 [Available from: <https://www.ethnicity-facts-figures.service.gov.uk/style-guide/ethnic-groups#2011-census>].
- 10
- 11 37. Krueger RA, Casey MA. Focus groups: a practical guide for applied research. 5th ed. Thousand Oaks, California: SAGE; 2015.
- 12
- 13 38. QSR International Pty Ltd. NVivo Version Release 1.6.2. 2022.
- 14
- 15 39. Patton MQ. Enhancing the quality and credibility of qualitative analysis. *Health Serv Res.* 1999;34(5 Pt 2):1189-208.
- 16
- 17 40. Barbour RS. Checklists for improving rigour in qualitative research: a case of the tail wagging the dog? *BMJ.* 2001;322(7294):1115-7.
- 18
- 19 41. O'Brien BC, Harris IB, Beckman TJ, Reed DA, Cook DA. Standards for reporting qualitative research: a synthesis of recommendations. *Acad Med.* 2014;89(9):1245-51.
- 20
- 21 42. Gilliam C, Russell CJ. Impact of racial microaggressions in the clinical learning environment and review of best practices to support learners. *Curr Probl Pediatr Adolesc Health Care.* 2021;51(10):101090.
- 22
- 23 43. Teshome BG, Desai MM, Gross CP, Hill KA, Li F, Samuels EA, et al. Marginalized identities, mistreatment, discrimination, and burnout among US medical students: cross sectional survey and retrospective cohort study. *BMJ.* 2022;376:e065984.
- 24
- 25 44. Wong-Padoongpatt G, Zane N, Okazaki S, Saw A. Decreases in implicit self-esteem explain the racial impact of microaggressions among Asian Americans. *J Couns Psychol.* 2017;64(5):574-83.
- 26
- 27 45. Huynh VW. Ethnic microaggressions and the depressive and somatic symptoms of Latino and Asian American adolescents. *J Youth Adolesc.* 2012;41(7):831-46.
- 28
- 29 46. Torres L, Driscoll MW, Burrow AL. Microaggressions and psychological functioning among high achieving African-Americans: A mixed-methods approach. *Journal of Social and Clinical Psychology.* 2010.
- 30
- 31 47. Teherani A, Hauer KE, Fernandez A, King TE, Jr., Lucey C. How Small Differences in Assessed Clinical Performance Amplify to Large Differences in Grades and Awards: A Cascade With Serious Consequences for Students Underrepresented in Medicine. *Acad Med.* 2018;93(9):1286-92.
- 32
- 33 48. Althubaiti A. Information bias in health research: definition, pitfalls, and adjustment methods. *J Multidiscip Healthc.* 2016;9:211-7.
- 34
- 35 49. Khare SR, Vedel I. Recall bias and reduction measures: an example in primary health care service utilization. *Family Practice.* 2019;36(5):672-6.
- 36
- 37 50. Tsouroufli M, Rees CE, Monrouxe LV, Sundaram V. Gender, identities and intersectionality in medical education research. *Med Educ.* 2011;45(3):213-6.
- 38
- 39 51. King N, Horrocks C, Brooks J. Interviews in qualitative research: Sage; 2018.
- 40
- 41 52. Cohen L, Manion L, Morrison K. Research Methods in Education. New York: Routledge; 2018.
- 42
- 43 53. Isik U, Wouters A, Croiset G, Kusurkar RA. "What kind of support do I need to be successful as an ethnic minority medical student?" A qualitative study. *BMC Med Educ.* 2021;21(1):6.
- 44
- 45
- 46
- 47
- 48
- 49
- 50
- 51
- 52
- 53
- 54
- 55
- 56
- 57
- 58
- 59
- 60

- 1  
2  
3  
4  
5  
6  
7  
8  
9  
10  
11  
12  
13  
14  
15  
16  
17  
18  
19  
20  
21  
22  
23  
24  
25  
26  
27  
28  
29  
30  
31  
32  
33  
34  
35  
36  
37  
38  
39  
40  
41  
42  
43  
44  
45  
46  
47  
48  
49  
50  
51  
52  
53  
54  
55  
56  
57  
58  
59  
60
54. Dickins K, Levinson D, Smith SG, Humphrey HJ. The minority student voice at one medical school: lessons for all? *Acad Med.* 2013;88(1):73-9.
55. Medical Schools Council. MSC ED&I Alliance London: Medical Schools Council; 2021 [Available from: <https://www.medschools.ac.uk/our-work/equality-diversity-inclusion/msc-edi-alliance>].
56. Kumagai AK, Lypson ML. Beyond cultural competence: critical consciousness, social justice, and multicultural education. *Acad Med.* 2009;84(6):782-7.
57. British Medical Association. A charter for medical schools to prevent and address racial harassment London: British Medical Association; 2020 [Available from: <https://www.bma.org.uk/media/2030/bma-med-school-charter-implementation.pdf>].
58. Advance HE. Race Equality Charter York: Advance HE; 2020 [Available from: <https://www.advance-he.ac.uk/equality-charters/race-equality-charter>].

Figure 1: Participants' demographics

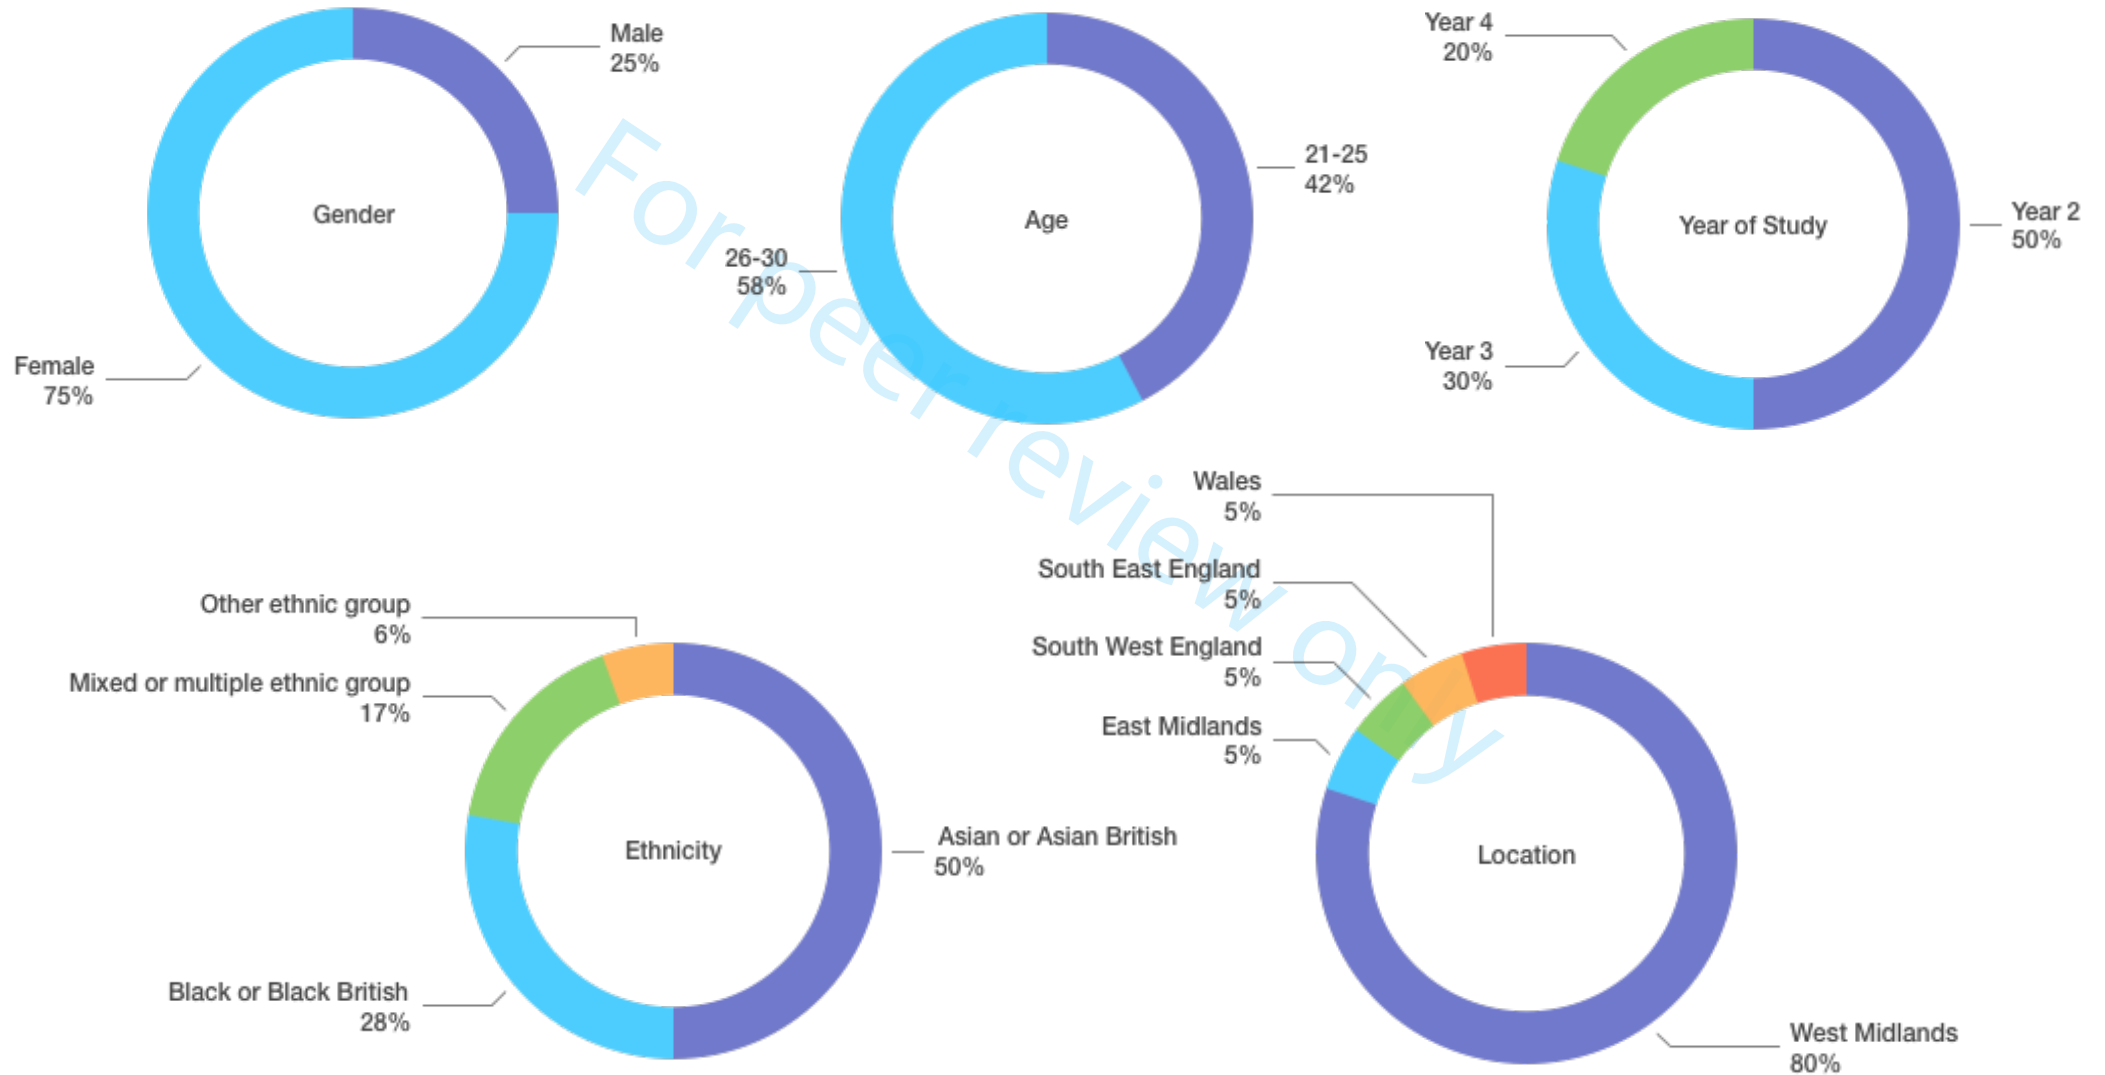

Figure 2: Domains and Themes

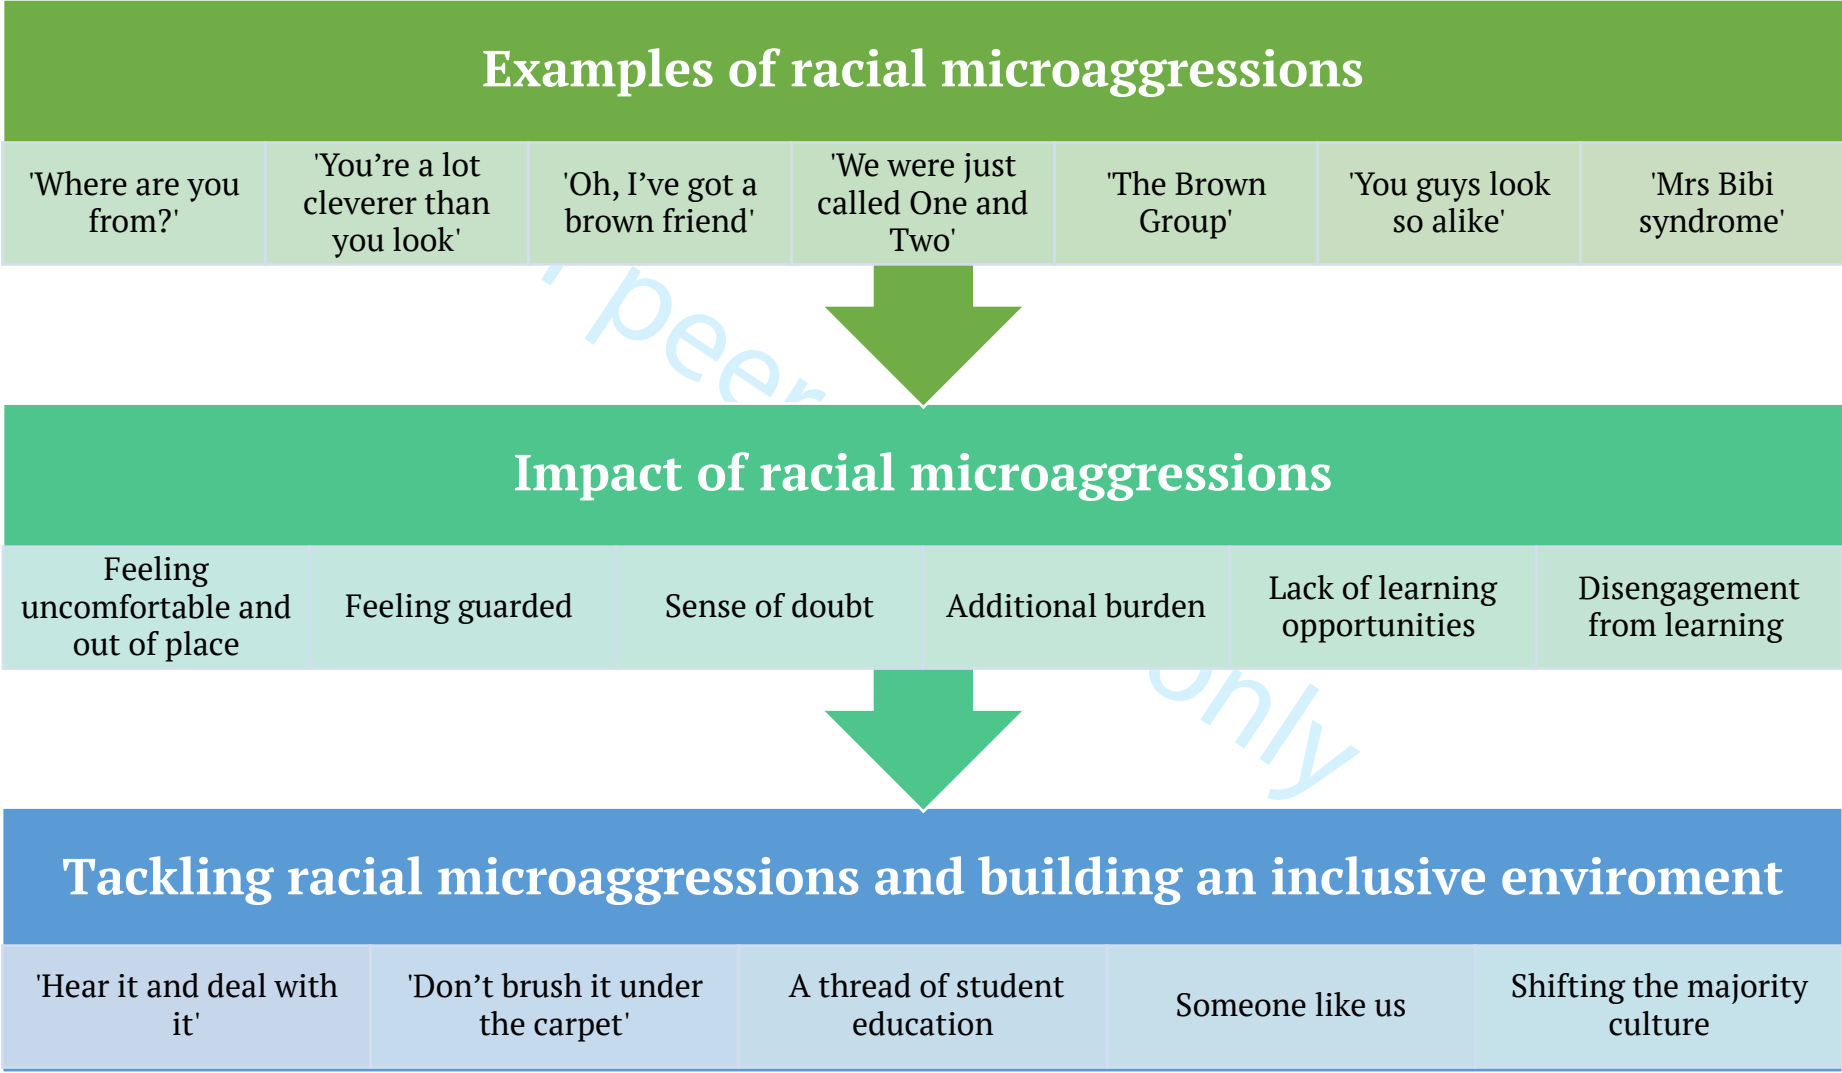

Supplemental material for “Where are you really from?": A qualitative study of racial microaggressions and the impact on medical students in the United Kingdom

## **APPENDIX 1**

### **INTERVIEW SCHEDULE**

Preamble: *Thank you for joining us for this focus group. As you know, we are studying racial microaggressions as experienced by graduate-entry medical students such as yourselves. Racial microaggressions are brief and commonplace daily verbal, behavioural, or environmental indignities that communicate hostile, derogatory, or negative racial slights towards people of colour. The purpose of this study is to contribute student perspectives to the body of knowledge related to promoting student success in medical schools. Greater understanding of how microaggressions are experienced can lead to increased student support to help them reach their full academic potential.*

1. Have you experienced racial microaggressions during your time at medical school? If so, would you describe the circumstances?
2. Describe the feelings you had while receiving racial microaggressions.
3. What impact have racial microaggressions had on you?
4. Do you think racial microaggressions have impacted your learning and performance at medical school? If so, can you explain how racial microaggressions have impacted your learning and performance?
5. Visualise the ideal inclusive environment in your school. What would need to change in interactions and relationships to create this environment? What would need to change structurally or organizationally to create an inclusive environment?
6. Can you think of anything else your medical school can do to specifically support students from racially minoritised backgrounds?

Thank you very much for your participation and time.

As I said earlier, the information you have given me will be anonymised and held only by the research team.

## Standards for Reporting Qualitative Research (SRQR)\*

<http://www.equator-network.org/reporting-guidelines/srqr/>

Page/line  
no(s).

### Title and abstract

|                                                                                                                                                                                                                                                              |     |
|--------------------------------------------------------------------------------------------------------------------------------------------------------------------------------------------------------------------------------------------------------------|-----|
| <p><b>Title</b> - Concise description of the nature and topic of the study Identifying the study as qualitative or indicating the approach (e.g., ethnography, grounded theory) or data collection methods (e.g., interview, focus group) is recommended</p> | 1   |
| <p><b>Abstract</b> - Summary of key elements of the study using the abstract format of the intended publication; typically includes background, purpose, methods, results, and conclusions</p>                                                               | 3-4 |

### Introduction

|                                                                                                                                                                     |     |
|---------------------------------------------------------------------------------------------------------------------------------------------------------------------|-----|
| <p><b>Problem formulation</b> - Description and significance of the problem/phenomenon studied; review of relevant theory and empirical work; problem statement</p> | 5-6 |
| <p><b>Purpose or research question</b> - Purpose of the study and specific objectives or questions</p>                                                              | 5-6 |

### Methods

|                                                                                                                                                                                                                                                                                                                                                                                                             |      |
|-------------------------------------------------------------------------------------------------------------------------------------------------------------------------------------------------------------------------------------------------------------------------------------------------------------------------------------------------------------------------------------------------------------|------|
| <p><b>Qualitative approach and research paradigm</b> - Qualitative approach (e.g., ethnography, grounded theory, case study, phenomenology, narrative research) and guiding theory if appropriate; identifying the research paradigm (e.g., postpositivist, constructivist/ interpretivist) is also recommended; rationale**</p>                                                                            | 7    |
| <p><b>Researcher characteristics and reflexivity</b> - Researchers' characteristics that may influence the research, including personal attributes, qualifications/experience, relationship with participants, assumptions, and/or presuppositions; potential or actual interaction between researchers' characteristics and the research questions, approach, methods, results, and/or transferability</p> | 7,29 |
| <p><b>Context</b> - Setting/site and salient contextual factors; rationale**</p>                                                                                                                                                                                                                                                                                                                            | 8-9  |
| <p><b>Sampling strategy</b> - How and why research participants, documents, or events were selected; criteria for deciding when no further sampling was necessary (e.g., sampling saturation); rationale**</p>                                                                                                                                                                                              | 8    |
| <p><b>Ethical issues pertaining to human subjects</b> - Documentation of approval by an appropriate ethics review board and participant consent, or explanation for lack thereof; other confidentiality and data security issues</p>                                                                                                                                                                        | 8    |
| <p><b>Data collection methods</b> - Types of data collected; details of data collection procedures including (as appropriate) start and stop dates of data collection and analysis, iterative process, triangulation of sources/methods, and modification of procedures in response to evolving study findings; rationale**</p>                                                                             | 8-9  |
| <p><b>Data collection instruments and technologies</b> - Description of instruments (e.g., interview guides, questionnaires) and devices (e.g., audio recorders) used for data collection; if/how the instrument(s) changed over the course of the study</p>                                                                                                                                                | 8-9  |
| <p><b>Units of study</b> - Number and relevant characteristics of participants, documents, or events included in the study; level of participation (could be reported in results)</p>                                                                                                                                                                                                                       | 8    |
| <p><b>Data processing</b> - Methods for processing data prior to and during analysis, including transcription, data entry, data management and security, verification of data integrity, data coding, and anonymization/de-identification of excerpts</p>                                                                                                                                                   | 9-10 |

|                  |                                                                                                                                                                                                                       |      |
|------------------|-----------------------------------------------------------------------------------------------------------------------------------------------------------------------------------------------------------------------|------|
| 1<br>2<br>3<br>4 | <b>Data analysis</b> - Process by which inferences, themes, etc., were identified and developed, including the researchers involved in data analysis; usually references a specific paradigm or approach; rationale** | 9-10 |
| 5<br>6<br>7      | <b>Techniques to enhance trustworthiness</b> - Techniques to enhance trustworthiness and credibility of data analysis (e.g., member checking, audit trail, triangulation); rationale**                                | 9-10 |

## Results/findings

|                |                                                                                                                                                                                                   |       |
|----------------|---------------------------------------------------------------------------------------------------------------------------------------------------------------------------------------------------|-------|
| 10<br>11<br>12 | <b>Synthesis and interpretation</b> - Main findings (e.g., interpretations, inferences, and themes); might include development of a theory or model, or integration with prior research or theory | 11-25 |
| 13<br>14       | <b>Links to empirical data</b> - Evidence (e.g., quotes, field notes, text excerpts, photographs) to substantiate analytic findings                                                               | 11-25 |

## Discussion

|                                        |                                                                                                                                                                                                                                                                                                                                                                                                             |       |
|----------------------------------------|-------------------------------------------------------------------------------------------------------------------------------------------------------------------------------------------------------------------------------------------------------------------------------------------------------------------------------------------------------------------------------------------------------------|-------|
| 17<br>18<br>19<br>20<br>21<br>22<br>23 | <b>Integration with prior work, implications, transferability, and contribution(s) to the field</b> - Short summary of main findings; explanation of how findings and conclusions connect to, support, elaborate on, or challenge conclusions of earlier scholarship; discussion of scope of application/generalizability; identification of unique contribution(s) to scholarship in a discipline or field | 25-31 |
| 24                                     | <b>Limitations</b> - Trustworthiness and limitations of findings                                                                                                                                                                                                                                                                                                                                            | 27-29 |

## Other

|                |                                                                                                                                               |    |
|----------------|-----------------------------------------------------------------------------------------------------------------------------------------------|----|
| 27<br>28<br>29 | <b>Conflicts of interest</b> - Potential sources of influence or perceived influence on study conduct and conclusions; how these were managed | 32 |
| 30<br>31<br>32 | <b>Funding</b> - Sources of funding and other support; role of funders in data collection, interpretation, and reporting                      | 32 |

\*The authors created the SRQR by searching the literature to identify guidelines, reporting standards, and critical appraisal criteria for qualitative research; reviewing the reference lists of retrieved sources; and contacting experts to gain feedback. The SRQR aims to improve the transparency of all aspects of qualitative research by providing clear standards for reporting qualitative research.

\*\*The rationale should briefly discuss the justification for choosing that theory, approach, method, or technique rather than other options available, the assumptions and limitations implicit in those choices, and how those choices influence study conclusions and transferability. As appropriate, the rationale for several items might be discussed together.

### Reference:

O'Brien BC, Harris IB, Beckman TJ, Reed DA, Cook DA. **Standards for reporting qualitative research: a synthesis of recommendations.** *Academic Medicine*, Vol. 89, No. 9 / Sept 2014  
DOI: [10.1097/ACM.0000000000000388](https://doi.org/10.1097/ACM.0000000000000388)



# BMJ Open

## "Where are you really from?": A qualitative study of racial microaggressions and the impact on medical students in the United Kingdom

|                                 |                                                                                                                                                                                                                                                                                                                                                                                                                                                                                                                                     |
|---------------------------------|-------------------------------------------------------------------------------------------------------------------------------------------------------------------------------------------------------------------------------------------------------------------------------------------------------------------------------------------------------------------------------------------------------------------------------------------------------------------------------------------------------------------------------------|
| Journal:                        | <i>BMJ Open</i>                                                                                                                                                                                                                                                                                                                                                                                                                                                                                                                     |
| Manuscript ID                   | bmjopen-2022-069009.R1                                                                                                                                                                                                                                                                                                                                                                                                                                                                                                              |
| Article Type:                   | Original research                                                                                                                                                                                                                                                                                                                                                                                                                                                                                                                   |
| Date Submitted by the Author:   | 15-Feb-2023                                                                                                                                                                                                                                                                                                                                                                                                                                                                                                                         |
| Complete List of Authors:       | Morrison, Nariell; University of Warwick Warwick Medical School, Clinical Trials Unit; University of Oxford, Department of Education<br>Zaman, Tabbasum; University of Warwick Warwick Medical School, Division of Health Sciences<br>Webster, Georgia; University of Warwick Warwick Medical School, Division of Health Sciences<br>Sorinola, Olanrewaju; University of Warwick Warwick Medical School, Division of Health Sciences<br>Blackburn, Clare; University of Warwick Warwick Medical School, Division of Health Sciences |
| <b>Primary Subject Heading</b>: | Medical education and training                                                                                                                                                                                                                                                                                                                                                                                                                                                                                                      |
| Secondary Subject Heading:      | Qualitative research                                                                                                                                                                                                                                                                                                                                                                                                                                                                                                                |
| Keywords:                       | MEDICAL EDUCATION & TRAINING, QUALITATIVE RESEARCH, EDUCATION & TRAINING (see Medical Education & Training)                                                                                                                                                                                                                                                                                                                                                                                                                         |
|                                 |                                                                                                                                                                                                                                                                                                                                                                                                                                                                                                                                     |

SCHOLARONE™  
Manuscripts



I, the Submitting Author has the right to grant and does grant on behalf of all authors of the Work (as defined in the below author licence), an exclusive licence and/or a non-exclusive licence for contributions from authors who are: i) UK Crown employees; ii) where BMJ has agreed a CC-BY licence shall apply, and/or iii) in accordance with the terms applicable for US Federal Government officers or employees acting as part of their official duties; on a worldwide, perpetual, irrevocable, royalty-free basis to BMJ Publishing Group Ltd ("BMJ") its licensees and where the relevant Journal is co-owned by BMJ to the co-owners of the Journal, to publish the Work in this journal and any other BMJ products and to exploit all rights, as set out in our [licence](#).

The Submitting Author accepts and understands that any supply made under these terms is made by BMJ to the Submitting Author unless you are acting as an employee on behalf of your employer or a postgraduate student of an affiliated institution which is paying any applicable article publishing charge ("APC") for Open Access articles. Where the Submitting Author wishes to make the Work available on an Open Access basis (and intends to pay the relevant APC), the terms of reuse of such Open Access shall be governed by a Creative Commons licence – details of these licences and which [Creative Commons](#) licence will apply to this Work are set out in our licence referred to above.

Other than as permitted in any relevant BMJ Author's Self Archiving Policies, I confirm this Work has not been accepted for publication elsewhere, is not being considered for publication elsewhere and does not duplicate material already published. I confirm all authors consent to publication of this Work and authorise the granting of this licence.

1  
2  
3  
4  
5  
6  
7  
8  
9  
10  
11  
12  
13  
14  
15  
16  
17  
18  
19  
20  
21  
22  
23  
24  
25  
26  
27  
28  
29  
30  
31  
32  
33  
34  
35  
36  
37  
38  
39  
40  
41  
42  
43  
44  
45  
46  
47  
48  
49  
50  
51  
52  
53  
54  
55  
56  
57  
58  
59  
60

## **“Where are you *really* from?”: A qualitative study of racial microaggressions and the impact on medical students in the United Kingdom**

### **Authors:**

#### **Nariell Morrison**

Honorary Clinical Research Fellow  
Clinical Trials Unit  
Warwick Medical School  
University of Warwick  
Coventry, UK

MSc student

Department of Education  
University of Oxford  
Oxford, UK

#### **Tabbasum Zaman**

MBChB student  
Division of Health Sciences  
Warwick Medical School  
University of Warwick  
Coventry, UK

#### **Georgia Webster**

MBChB student  
Division of Health Sciences  
Warwick Medical School  
University of Warwick  
Coventry, UK

#### **Olanrewaju Sorinola**

Professor  
Division of Health Sciences  
Warwick Medical School  
University of Warwick  
Coventry, UK

#### **Clare M Blackburn**

Associate Professor  
Division of Health Sciences  
Warwick Medical School  
University of Warwick  
Coventry, UK

1  
2  
3  
4 **Corresponding Author:** Nariell Morrison ([n.morrison@warwick.ac.uk](mailto:n.morrison@warwick.ac.uk))  
5  
6

7 **Subject area:** Medical Education

8 **Keywords:** diversity, ethnic groups, microaggressions, undergraduate, medical education, qualitative  
9 research  
10

11  
12 **MeSH terms:**

- 13 Cultural diversity
  - 14 Education, Medical, Undergraduate
  - 15 Minority Groups
  - 16 Microaggression
  - 17 Learning
  - 18 Qualitative Research
  - 19 Racism
  - 20 Students, Medical
  - 21 Schools, Medical
  - 22 United Kingdom
- 23  
24  
25  
26  
27

28 **Word count:** 8739  
29  
30  
31  
32  
33  
34  
35  
36  
37  
38  
39  
40  
41  
42  
43  
44  
45  
46  
47  
48  
49  
50  
51  
52  
53  
54  
55  
56  
57  
58  
59  
60

For peer review only

## Abstract

**Objective:** To explore graduate-entry medical students' experiences of racial microaggressions, the impact of these on learning, performance and attainment, and their views on how these can be reduced.

**Design:** Qualitative study using semi-structured focus groups and group interviews.

**Setting:** United Kingdom

**Participants:** 20 graduate-entry medical students were recruited using volunteer and snowball sampling; all students self-identified as being from racially minoritised (RM) backgrounds.

**Results:** Participants reported experiencing numerous types of racial microaggressions during their time at medical school. Students' accounts highlighted how these impacted directly and indirectly on their learning, performance, and well-being. Students frequently reported feeling uncomfortable and out of place in teaching sessions and clinical placements. Students also reported feeling invisible and ignored in placements and not being offered the same learning opportunities as their white counterparts. This led to lack of access to learning experiences or disengagement from learning. Many participants described how being from a RM background was associated with feelings of apprehension and having their 'guards up', particularly at the start of new clinical placements. This was perceived to be an additional burden that was not experienced by their white counterparts. Students suggested that future interventions should focus on institutional changes to diversify student and staff populations; shifting the culture to build and maintain inclusive environments; encouraging open, transparent conversations around racism and promptly managing any student-reported racial experiences.

**Conclusion:** RM students in this study reported that their medical school experiences were regularly affected by racial microaggressions. Students believed these microaggressions impeded their learning, performance, and well-being. It is imperative that institutions increase their awareness of the difficulties faced by RM students and provide appropriate support in challenging times. Fostering inclusion as well as embedding anti-racist pedagogy into medical curricula are likely to be beneficial.

## Article Summary

### Strengths and limitations of this study

- This study utilises a social constructivist approach, which provides an understanding of students' lived experiences of racial microaggressions and their perspectives on the impact of racial microaggressions on their learning, performance and well-being.
- This study has a multi-institutional, multi-gender, multi-cohort qualitative data set.
- The use of online focus groups and group interviews allowed frank responses and recollection was facilitated through discussion.
- Data collection was conducted online due to the safety restrictions imposed by the COVID-19 pandemic, potentially affecting the rapport between the researchers and participants.
- Assessing a statistically significant association between racial microaggressions and medical students' mental health was beyond the scope of this paper.

## INTRODUCTION

Differential attainment in medical education has been well documented globally(1). Studies suggest that students from racially minoritised (RM) backgrounds, on average, perform less well than white counterparts in both machine-marked assessments of clinical knowledge and practical assessments of clinical competence(2-4). It has been noted that these differential attainments related to RM groups represents complex, systematic inequalities. These include prolonged social, economic, and educational inequalities in societies as well as structural and institutional policies and practices that promote white majority cultures that impact negatively on the health and learning experiences of RM students(5-7). In recent years, studies on differential attainment have widened to explore how experiences of racism and discrimination in medical education impact on learners and how these can be addressed at structural and individual levels.

While researching overt and direct forms of racism, such as racial epithets or physical assaults, in medical education continues to be important, it has been recognised that more subtle forms of racism such as racial microaggressions impact on students and are likely to contribute to attainment differentials(8, 9). Racial microaggressions are defined as ‘brief and commonplace daily verbal, behavioural, or environmental indignities, whether intentional or unintentional, that communicate hostile, derogatory, or negative racial slights and insults toward people of colour’(10). Racial microaggressions can be difficult to manage due to their intangibility; they are often minimised as simple racial faux pas or cultural missteps(11). Studies have shown that these ‘subtle racist’ interactions(12) have caused significant distress, affect physical and mental health and have impacted on learning and academic attainment on learners in different educational settings, including primary, secondary and tertiary educational institutions(13-19). The wider literature on racial microaggressions also suggest that experiencing racial microaggressions in the classroom can contribute towards hostile educational climates and has been linked to feelings of isolation, self-doubt, and invisibility(20-22). Moreover, racial microaggressions are also associated with anxiety, depression, alcohol use, and may alter diurnal cortisol secretion leading to increased physiological stress responses(23-25).

While evidence of racial microaggressions and their impact on learners in medicine is emerging, the evidence base relating to medical students is small and largely from the US(9, 11, 12, 26-32).

Although these studies document medical students’ reports of microaggressions and provide some evidence of impacts on learning, with the exception of Ackerman-Barger et al’s work(11), they offer few insights into how microaggressions directly and indirectly impact on students’ learning and performance. Furthermore, the extent to which the findings from these studies can be extended to

1  
2  
3 medical students learning in different health care systems and socio-cultural contexts beyond the US  
4 is unclear. Two recent studies from the UK(33) and Sweden(12) highlighted daily experiences of  
5 microaggressions and provided some limited insights on impacts on learning. If medical schools are  
6 to address differential attainment, diversify the medical workforce, and create positive learning  
7 environments for RM students, there is an urgent need to understand how racial microaggressions  
8 are experienced by medical students in other countries and how they impact on their learning.  
9  
10  
11  
12

13  
14  
15 To the best of our knowledge, no published studies have explored, in any depth, racial  
16 microaggressions as experienced by United Kingdom (UK) medical students and their impact on  
17 learning. The UK Equality Act 2010 places a legal duty on universities to address any form of  
18 discrimination or harassment related to a protected characteristic that may be adversely impacting  
19 on students' learning experiences and environment(34). Graduate-entry medical (GEM) students  
20 have already demonstrated high academic achievements as they enter the medical programme with  
21 an existing undergraduate degree. As GEM courses currently account for approximately 10% of all  
22 UK medical programmes(35), it is important to report the experiences of RM GEM students and  
23 examine any impact on learning and performance; thus, contributing to the portfolio of research  
24 into racism and differential attainment in medical education.  
25  
26  
27  
28  
29  
30  
31  
32

33 We recognise that the use of terms to describe minority communities is a contested issue. It is  
34 therefore necessary to clearly establish a shared lexicon between the authors and readers of this  
35 paper. 'Race' is a socially constructed human categorisation system used to distinguish between  
36 groups of individuals that have similar phenotypes (36). Due to the social construction of 'race',  
37 dominant groups have shared and influenced racial categories in order to uphold power structures,  
38 resulting in racial inequality. Despite its social construction, 'race' is significant in the daily realities of  
39 RM people. We have chosen to use the term racially minoritised (RM) throughout this paper. Many  
40 scholars have highlighted the problematic use of the term 'Black, Asian and Minority Ethnic' (BAME),  
41 including its grouping together of diverse ethnicities into a single homogenous ethnic group(37, 38).  
42 The term RM provides a social constructionist approach to understanding that individuals have been  
43 actively minoritised by others through social processes of power and privilege(39). Terms such as  
44 BAME, ethnic minority and person of colour, do not acknowledge the influence of social processes.  
45 Although we use the term RM, some participants in this study used other terms such as BME (Black  
46 and Minority Ethnic); these are preserved in any quotes used to maintain authenticity. While we  
47 support the use of RM, we are aware that language is continuously evolving, within and between  
48 groups.  
49  
50  
51  
52  
53  
54  
55  
56  
57  
58  
59  
60



1  
2  
3  
4  
5 This paper reports data from a study of GEM students in the UK that built upon *Ackerman-Barger et*  
6 *al's* work(11), exploring UK GEM students' experiences of racial microaggressions and examining the  
7 impacts of these on learning and performance. The study had three aims: to identify experiences of  
8 racial microaggressions among RM medical students; to explore student perspectives on how their  
9 experiences of microaggressions impacted on their learning and performance; to use the lens of the  
10 student participants to identify how medical schools can reduce racial microaggressions and build  
11 more inclusive learning environments.  
12  
13  
14  
15  
16

## 17 **METHODS**

### 18 **Design**

19  
20 To explore and understand medical school students' experiences, this work was undertaken through  
21 a social constructivist lens. Social constructivism emphasises that learning and other cognitive  
22 functions are critically influenced by the environment, culture and social interactions(40). Given that  
23 students' learning experience in medical education can be theorised as a social process(40), social  
24 constructivism is an appropriate conceptual framework to direct and guide this work. A qualitative  
25 approach, using focus groups and group interviews to collect participants' narratives, was selected  
26 as this enabled reporting of the realities as perceived by participants(41-43).  
27  
28  
29  
30  
31  
32  
33

34  
35 Befitting our interpretivist approach, we also acknowledge the active role of the researchers (and  
36 subsequent subjectivity) in this study's design and analysis(44). Thus, in the interest of reflexivity, we  
37 have detailed our own backgrounds. NM is an Honorary Clinical Research Fellow and a MSc student  
38 in Medical Education currently researching differential attainment, and a medical doctor who has  
39 experienced racial discrimination first-hand. TZ and GW are GEM students, who have witnessed and  
40 experienced racism during their studies. OS is a Professor of Medical Education and a Consultant  
41 Obstetrician and Urogynaecologist with expertise in exploring differential attainment and has also  
42 experienced racial discrimination. NM, TZ, GW and OS identify as being from RM backgrounds,  
43 namely Black British, Asian Pakistani, Mixed White/Black Caribbean, and Black African respectively.  
44  
45 CB is an Associate Professor in Health Sciences who has extensively researched health and medical  
46 education in relation to socio-economic inequalities and socio-demographic factors. CB previously  
47 worked as a nurse and identifies as White British. All research team members have had prior  
48 experience undertaking qualitative research projects.  
49  
50  
51  
52  
53  
54  
55  
56  
57  
58  
59  
60

### **Ethical approval**

Institutional ethical approval was obtained in March 2021 from the University of Warwick's Biomedical & Scientific Research Ethics Committee.

### **Sample strategy and recruitment**

GEM students from medical schools in the UK who self-identified as being from a RM background were recruited. Participants were eligible to participate if they had at least one academic year experience of a UK GEM degree course. Snowball sampling was used in this research to gain access to the smaller RM populations, which can be difficult for researchers to reach. Twenty-one students registered interest and accepted the invitation to participate.

### **Data collection methods**

Data were gathered in focus groups and group interviews using a semi-structured interview schedule. Based on participants' availability, six focus groups, each of 4-5 multi-cohort students, were then scheduled throughout June – September 2021. Owing to unexpected scheduling changes, one volunteer could not attend any of the focus groups and as such those scheduled focus groups were more accurately classified as group interviews as they consisted of 2-3 people. The interview schedule (see supplementary information) was developed after a review of the literature and drew on themes identified in previous relevant research(11, 27, 33). The interview schedule consisted of open-ended discussion questions.

All interviews were held via Microsoft Teams to accommodate the COVID-19 pandemic-related restrictions and facilitated by either TZ or GW. Focus groups averaged sixty minutes and group interviews averaged forty-five minutes. First-hand narratives were encouraged throughout each discussion, and participants were prompted to clarify and expand their answers. Participants were asked to self-report the RM group they identified with using the 2011 UK Census categories(45). First-hand narratives were encouraged throughout each discussion, and participants were prompted to clarify and expand their answers. Participants were encouraged to respond to others' contributions and, if possible, provide similar or contrasting accounts.

### **Data processing and analysis**

All the interviews were video-recorded and transcribed verbatim by two researchers (TZ, GW). Transcripts were anonymised and QSR NVivo (Release 1.6.2)(46) software was used for data categorisation and management.

1  
2  
3  
4  
5 Thematic analysis was adopted using Braun and Clarke's six-phase framework(41). All members of  
6 the research team read the transcripts individually to familiarise themselves with the data. Research  
7 team members (NM, CB, OS) independently analysed and coded the data, then compared,  
8 discussed, and collectively agreed upon themes. Discussions provided a form of analyst  
9 triangulation(47) and enabled data interpretation from a range of multicultural interprofessional  
10 perspectives(48), establishing the validity and trustworthiness of the data. The Standards for  
11 Reporting Qualitative Research (SRQR) guidelines were adopted(49).  
12  
13  
14  
15  
16  
17

### 18 **Patient and public involvement**

19 Patients or the public were not involved in the design and conduct of this study.  
20  
21  
22

## 23 **RESULTS**

### 24 **Participants**

25 Twenty medical students participated in the study. Participant demographics are shown in figure 1.  
26 Participants were registered on a GEM degree course and therefore held either a minimum of an  
27 upper second-class honours undergraduate degree (or overseas equivalent) or a postgraduate  
28 degree such as a Master's or Doctoral qualification. Nineteen out of twenty participants were UK  
29 home students, schooled in the UK.  
30  
31  
32  
33  
34  
35

36 Data were categorised into three main domains: examples of racial microaggressions; impact of racial  
37 microaggressions and participants' views on tackling racial microaggressions and building an inclusive  
38 medical school environment (figure 2).  
39  
40  
41  
42  
43

### 44 **Experiences of racial microaggressions**

45 All participants highlighted experiences of racial microaggressions during undergraduate medical  
46 training. Participants reported that racial microaggressions came from numerous sources, including  
47 peers, faculty, and patients and occurred in both classroom and clinical environments. The data  
48 were categorised into six themes: Assumptions of being foreign; Assumptions of intellectual  
49 inferiority; Denials of racial experiences; Renaming; Group labelling; and Stereotyping.  
50  
51  
52  
53  
54  
55  
56  
57  
58  
59  
60

### **Assumption of being foreign**

Most participants described instances of where they were assumed to have been born in a country abroad, even though the UK was their birthplace. Participants reported that such instances frequently occurred in the clinical environment when interacting with clinicians and patients:

*I went to see a patient...and then she was just like, "Oh where are you from?" and I was just like "London." And she was like "No." (P5; Black British Female)*

*... in terms of consultants, it's been more of that again, "where are you from?" (P4; Asian British Female)*

Some also remarked that they would be repeatedly asked the same question related to their heritage, if they initially did not provide the response the questioner wanted:

*I feel like that happens so much to me ... they kind of don't accept your first answer [when] you say you're from somewhere in England, they're like "no, no where are you from from?" (P17; Asian British Female)*

Additionally, several students felt a sense of othering as they commented that the repetitive questioning of their nationality/heritage stemmed from the construction of the normative medical student as a White person:

*there's kind of like an assumption that the normal at medical school is white (P11; Asian British Female)*

### **Assumption of intellectual inferiority**

Participants frequently described experiences in which peers and patients made assumptions of intellectual inferiority. Many reported that in the clinical environment patients often questioned their medical student status as well as doubted their clinical and procedural skills' ability:

*So, patients been refusing to be seen by me, questioning my ability to take bloods or cannulate or, uh, do procedural stuff that any other student would undergo. (P6; Asian British Male)*

*I've also had some people tell me that I'm a lot cleverer than I look ... do you know what I mean there's just the [racial] undertone of it (P16; Mixed White/Black Female)*

This assumption of intellectual inferiority also appeared to manifest in participant accounts that described the false assumption held by some White students, that their counterparts from RM backgrounds were selected into medical school due to implementation of a racial quota system, rather than based on academic achievement:

*we were discussing like how you get into Med school and [the student began] rolling their eyes and saying "yeah, but all these quotas are letting you know people who shouldn't be*

1  
2  
3 *here, just because of positive, uh, discrimination” (P11; Asian British Female)*  
4  
5

6 In addition to ascription of intelligence based on students’ racialised background, there were also  
7 assumptions made about students’ English language proficiency. These usually occurred in the  
8 clinical environment, with some students describing how it was assumed that English was not their  
9 first language, or they had language difficulties:  
10  
11

12 *And I’ve also been told I speak English really well, uhm, by nursing staff, as well as patients.*  
13 *(P3; Asian British Female)*  
14  
15

16 *... and they asked if English was my first language and...after saying yes, it is my first*  
17 *language, they kind of started to disagree with me and [asked], “are you sure? Are you sure*  
18 *it’s your first language?” And this was a staff member...a clinical tutor, so that was quite*  
19 *surprising. (P14; Asian British Female)*  
20  
21  
22

### 23 **Denial of racial experiences**

24 Some participants felt that medical school faculty and peers did not appreciate or understand the  
25 challenges they faced, as RM students, during medical school. Participants reported examples of  
26 where their personal experiences of racism and bias were often denied by others:  
27  
28  
29

30 *I feel like a lot of the times where I’ve tried to raise things, I think because it doesn’t meet*  
31 *enough, it doesn’t meet the threshold to, for someone to say that it was done with intent, to*  
32 *cause harm, people just try to excuse it away as other people being too sensitive (P11; Asian*  
33 *British Female)*  
34  
35

36 *... if I were to make a comment ... it would be like I’ve got a brown friend that says this and*  
37 *it’s like I’ve got an Indian friend so it just kind of invalidates your opinion because they have a*  
38 *contact who’s of an ethnic minority [background] to kind of supersede your opinion. (P13;*  
39 *Asian British Male)*  
40  
41  
42

### 43 **Renaming**

44 Perception of difficult names was another common racial microaggression described by participants.  
45 Several students felt a sense of frustration as they commented faculty and clinicians would often  
46 avoid saying their name as they perceived students’ names to be difficult to pronounce:  
47  
48  
49

50 *... so my name is actually like at the top of the alphabet. So, I’m always sort of the first*  
51 *person on the roster and, but I end up being on the last person because they can’t be*  
52 *bothered to pronounce it ...and then they’re like “right, this is a difficult one”. (P2; Arab*  
53 *Female)*  
54  
55

56 *...I’ve even had a consultant a couple of weeks ago, naming me and my CP [clinical*  
57 *partner] “One” and “Two.” ... I’d never experienced that [before] ...we don’t have long names*  
58 *and it would probably be easier to just call us by names. (P4; Asian British Female)*  
59  
60

1  
2  
3  
4  
5 One student described how they changed their name to avoid experiencing this racial  
6 microaggression and to stop feeling exasperated:

7  
8 *I changed my name specifically because I was frustrated with people pronouncing my name*  
9 *wrong, so I don't get it a lot anymore with my first name. (P5; Black British Female)*  
10

11  
12 Additionally, participants explained that faculty and peers would frequently mispronounce their  
13 name, often trying to shorten, substitute or anglicise it without their permission. Many found this  
14 alienating and impeding to build relationships with others:  
15

16  
17 *... I've had one member of staff suggest a nickname for me, like they've shortened my name*  
18 *for me...my name literally has 6 letters, it's very easy to pronounce. (P3; Asian British Female)*  
19

### 20 21 **Group labelling**

22  
23 Many participants expressed experiences of group labelling, by their peers, based on their perceived  
24 racial appearance. These experiences predominantly occurred in the medical school environment.  
25 Some students felt devalued and dehumanised by their peers as less effort was made to identify  
26 each person individually:  
27

28  
29 *we are somehow known as the "Brown Group" ... that's how we're referred to and ... when*  
30 *someone said it to my face, I was just like "What do you mean Brown Group?" And they're*  
31 *like "yeah, yeah, you know all of you brown people." (P4; Asian British Female)*  
32  
33

34  
35 *I've had people refer to [us] as coloured people (P18; Black British Female)*  
36  
37

38  
39 Misidentification in both the medical school and clinical environments was also reported by  
40 participants. Most students described experiences in which peers and medical school faculty had  
41 difficulty distinguishing between them and other students from similar RM backgrounds whereas  
42 fewer students reported instances of mistaken identity by clinicians whilst on their clinical  
43 placements:  
44

45  
46 *...I walked into a room and was called the name of another Brown girl with curly hair and I*  
47 *addressed it straight up. I was like ... "I'm not that person. We're just both mixed race and*  
48 *have curly hair" ...we don't even look remotely similar. (P1; Mixed White/Black Female)*  
49  
50

51  
52 *I was standing at the back of the theatre and then [the consultant] turned to me and ... asked*  
53 *me to do something and then she only realised when I was like "Oh, I, I can't do that. I'm not*  
54 *like qualified!" She was like "Oh, it's you, you're a student. You [and the registrar] look*  
55 *so alike," and I was just like but we really don't. (P5; Black British Female)*  
56  
57  
58  
59  
60

## **Stereotyping**

Many students talked about experiencing stereotypical slurs, where generalised beliefs about the behaviour of those from specific racial or ethnic groups were often vocalised by peers, faculty, and clinicians. Some students remarked that incorrect assumptions were made about them. This negatively affected their relationships with peers and staff:

*I've been called "sassy" quite a bit. I've never been called "sassy" so much until I came to this medical school. (P5; Black British Female)*

*... subtle racist comments [were] made during CBL (Case Based Learning) sessions..., for example [questions like], "oh, what are you having for lunch today? Is it you know, rice and curry?" They [would respond] "No, actually I'm having pasta." (P4; Asian British Female)*

A few students remarked that patients were also subject to negative stereotyping by faculty members. Such stereotyping reinforced racial bias and led to the further marginalisation of students from similar RM backgrounds:

*... one of the lecturers made reference to [a National Health Service Trust] and how a lot of the [Asian] patients suffer from (malingering) Mrs Bibi syndrome (P6; Asian British Male)*

## **Impact of racial microaggressions**

Participants reported various impacts of the racial microaggressions on their daily lives including their academic learning, performance, and mental wellbeing. These data were categorised into 6 themes: Feeling uncomfortable and out of place; Feeling guarded; Sense of doubt; Additional burden; Lack of learning opportunities; and Disengagement from learning.

### ***Feeling uncomfortable and out of place***

Participants reported how experiencing microaggressions could have a significant impact on their identity and belongingness. The racial microaggressions they experienced made them uncomfortable, lonely, isolated, and feeling out of place. This was a strong view reported by most participants.

*I would say overall just feeling uncomfortable is a very common feeling I do experience when I do get subjected to microaggressions; being very uncomfortable, feeling very embarrassed and then sometimes, especially on like later reflection and it can even you know, grow into anger and disdain and annoyance. (P18; Black British Female)*

*You kind of, are made to feel so disillusioned and out of place on the course. (P10; Mixed White/Black Female)*

1  
2  
3 While some students became frustrated and disillusioned, others tried to cope by hiding their  
4 personality, trying to fit in and conform:  
5

6 *And it makes you feel that you have to kind of accommodate others more than they can*  
7 *accommodate you... and so you try and conform as much as possible. (P13; Asian British*  
8 *Male)*  
9

### 10 11 **Feeling guarded**

12 Students expressed how previous experiences of microaggressions leads to feeling worried, anxious,  
13 and apprehensive in new and different environments. This was associated with a sense of being 'on  
14 guard' strongly noted by most participants which they found exhausting:  
15  
16  
17

18  
19 *I think another thing that I feel personally is I feel quite apprehensive when I'm starting a*  
20 *new placement because I don't know how people are going to perceive me and how they're*  
21 *going to treat me.' (P3; Asian British Female)*  
22

23  
24 *Like whenever we start new things, new rotations, you know how we do so much group*  
25 *work. It's always like oh well, who's going to be saying something and like you're just kind of*  
26 *waiting for the problems to arrive so it leaves you feeling really exhausted. (P11; Asian British*  
27 *Female)*  
28

29 Students explained that this feeling is even more pronounced in small settings, e.g., GP practice and  
30 community home visits, making them guarded and unable to relax in the first instance:  
31  
32

33  
34 *..... it's sort of unfamiliar territory until you get that sense of ease and then you can sort of*  
35 *relax and let your guard down. But up until then, especially on the first meeting, it's always*  
36 *guards up and OK, I'm going to have to uh sort of see what I'm going to have to uhm, not*  
37 *deal with, but sort of go with? (P4; Asian British Female)*  
38

39  
40 *We don't really know what we are walking into and then for a second we're like what if*  
41 *they're really angry or really don't like people from other cultures. It was all fine in the end,*  
42 *but it made us really weary and then it made me realise how dangerous particular*  
43 *community placements can feel ..... (P11; Asian British Female)*  
44

### 45 46 **Sense of doubt**

47 The impact of racial microaggressions on emotional wellbeing was evident in participants'  
48 narratives. Many students discussed how they frequently had feelings of self-doubt, unsure if they  
49 were overthinking what happened which is then followed by a sense of inadequacy and questioning  
50 whether they were good enough. In the following, three participants discussed their shared  
51 experiences of self- doubt:  
52  
53  
54  
55

56  
57 **Participant 15:** *I think you start doubting yourself a little bit, you're like, am I reading too*  
58 *much into it? Was this actually that bad? .... It's I guess, it eats at you sometimes, but it's*  
59 *mostly just the doubt of, am I, am I really suffering from discrimination right now? This is*  
60



1  
2  
3 always the question that I try to ask myself because I, I'm not a person who likes  
4 confrontation or things like that so. So, I try to avoid it as much as possible. (P15; Arab Male)  
5

6  
7 **Participant 16:** I don't think I could have phrased it any better. I think you're completely right  
8 in saying that it eats at you and it just kind of, makes you doubt yourself both as, I don't  
9 know. (P16; Mixed White/Black Female)  
10

11 **Participant 17:** Yeah, I really agree with what the others have said as well that yeah, you  
12 really doubt yourself you overthink it um and it just makes you, it makes me feel quite like,  
13 second class. (P17; Asian British Male)  
14  
15

### 16 **Additional burden**

17 Additional burden refers to the extra worry, stress, apprehension, and pressure that participants  
18 reported experiencing. Collectively, this was strongly perceived by participants to be over and above  
19 that experienced by white majority students and associated with experiencing microaggressions and  
20 constantly needing to prove themselves. This ultimately led to stress and, feeling exhausted, as  
21 reflected in the following:  
22  
23  
24  
25

26  
27 *It is another kind of added layer to the stress that we already have and I think personally for  
28 me, I just quite, find it quite exhausting. ...yeah but when it happens constantly, it's like  
29 breaking, it's like trying to hammer through a wall and you just keep doing constantly,  
30 constantly, eventually it's going to break (P5; Black British Female)*  
31

32  
33 *it's just something else for you to worry about experiencing these microaggressions and how  
34 people are viewing you differently. It's just something else to worry about on top of  
35 everything else that I'm guessing a lot of people not from ethnic minorities don't have to  
36 worry about. (P1; Mixed White/Black Female)*  
37

38  
39 *...having that extra pressure on you in a field that's already quite like high intensity uhm, can  
40 be a lot. (P9; Black British Female)*  
41

### 42 **Lack of learning opportunities**

43 Lack of learning opportunities was one of the key ways racial microaggressions appeared to impact  
44 students' learning. Students strongly stated that these denials of opportunities occurred in various  
45 contexts such as not being able to practise clinical skills, no invitations to study groups, no sharing of  
46 resources, and poor engagement / differential treatment from clinical faculty despite wanting to  
47 actively participate. The outcome of these were poor and negative student learning experiences:  
48  
49  
50  
51

52  
53  
54 *... my white [clinical partner] kind of gets questioned a little bit more. And I know we all hate  
55 being questioned by consultants, but I actually do find it useful sometimes so I would like  
56 some questions to be directed my way. But it feels like they kind of questioned her more  
57 and put her forward to kind of do histories and things before me, even though I am very  
58 willing to. (P1; Mixed White/Black Female)*  
59  
60

1  
2  
3  
4  
5  
6  
7  
8  
9  
10  
11  
12  
13  
14  
15  
16  
17  
18  
19  
20  
21  
22  
23  
24  
25  
26  
27  
28  
29  
30  
31  
32  
33  
34  
35  
36  
37  
38  
39  
40  
41  
42  
43  
44  
45  
46  
47  
48  
49  
50  
51  
52  
53  
54  
55  
56  
57  
58  
59  
60

*I was actually really excited to go in and see a C-section [caesarean section] for the first time...And there was a White girl in the room as well. And the White girl was the same grade as me, same year as me. We knew each other and she was allowed to kind of assist and do like parts of the procedure and when the obstetrician walked in, she kind of just looked at me and she was like "who are you?" And I was like "oh I'm the other Med Student." She didn't even dignify me with a verbal response. She kind of just pointed me out the room which was really demeaning (P8; Asian British Female).*

*Often patients are more agreeable in being seen by them (white students) and having procedures done by them. (P6; Asian British Male)*

### **Disengagement from learning**

Impact on students' learning and performance was a key manifestation of racial microaggressions. This was in part a culmination of experiences as discussed in the themes already reported above: lack of and inequitable learning opportunities, additional burdens, feeling uncomfortable and out of place. However, students further strongly identified disengagement from learning (from not fully applying themselves, reduced attendance and feeling unwanted) a significant contributor to their poor performance. These impacts on students' engagement with learning resulted from microaggressions experienced from a range of groups including peers, patients, supervisors, and healthcare workers:

*For me, they, the only thing that it probably makes me feel is that I don't want to go into placement and I say that .... Because that's a regular feeling anyway. You just think to yourself "I don't want to have to go through all of this again." ..... you're there to learn ultimately, and if you're going to get this from all sides, that's not just patients, but you're gonna get it from healthcare staff as well, it just makes it "well what is the point in me being here? (P20; Black British Male)*

*I find a lot, when I'm talking to a consultant or another medical staff member, particularly when I'm with my clinical partner, who is white.... Sometimes I just think, Oh well, they're not interested in me being here, so I won't listen and I won't engage, I won't kind of apply myself as much as I could, so then obviously, I'm taking less from that experience on placement. (P10; Mixed White/Black Female)*

*... that sort of impacted my performance ..... the fact that I was less inclined to go into placements. (P18; Black British Female)*

The impact of microaggressions on academic performance became clearer as students emphasised the reduced access and disruption of learning opportunities coupled with the disengagement from learning leading to their reduced performance.

## Participants' views on tackling racial microaggressions and building an inclusive medical school environment

Participants were asked their views on how racial microaggressions experienced during their undergraduate training could be tackled by their medical schools and on how medical schools could build more inclusive environments. Participants' views were categorised into 5 themes: Staff should 'hear it and deal with it'; 'Don't brush it under the carpet'; 'Someone like us'; and Shifting the majority culture.

### **Staff should 'hear it and deal with it'**

A high number of participants identified that often, racial microaggressions had been witnessed by medical school staff but not challenged at the point in time they occurred. Participants felt strongly that medical school staff should deal with racial microaggressions 'in the moment', as soon as they witnessed them:

*... like on medical school sites, like the CBL facilitators, hardly ever step in when there's uncomfortable moments and say, well, actually we don't think that should happen or that shouldn't be said. And often it's like kind of, if it's dealt with at all, it's never in the moment ... if they're teaching a session or leading a session or group work, if a comment is made, and they hear it, they need to deal with it straight away. (P11; Asian British Female)*

*...it's almost too late then to act in retrospect. And I think they need to put more in place. So it's. Being proactive rather than just reactive (P10; Mixed White/Black Female)*

Training staff to 'hear it and deal with it' in the moment was identified as a strategy to help staff respond proactively to these situations:

*... but more staff training, so I think we spoke briefly about earlier how the impact when staff don't act as allies or when staff let comments go unchallenged or stuff. And let, sort of these racist, racist or racial narratives, run through different settings. Things I think, if the staff and particularly clinical staff too have some sort of training about how to be an ally for all different groups of minorities. (P10; Mixed White/Black Female)*

### **'Don't brush it under the carpet'**

Closely associated with the theme above was the strongly held view that people's experiences of racial microaggressions should not be 'brushed under the carpet'. Rather, they should be openly acknowledged, and strategies put in place to challenge them:

*... it would be nice if they acknowledged the problem as it is or demonstrated some understanding of the challenges that we face. (P6; Asian British Male)*

1  
2  
3 ... just acknowledging that these are things that happen and not kind of brushing it under the  
4 carpet, 'cause we all know [name of Medical School] has a habit of just hiding their  
5 problems. (P8; Asian British Female)  
6  
7

8 Some participants expressed that the responsibility for calling out racial microaggressions should not  
9 be left to RM students, who were already trying to navigate these difficult situations in addition to  
10 their studies. A medical school 'where people call out these [racial] microaggressions ...would  
11 definitely improve our medical school experience'. Suggestions included having an identified person  
12 responsible for speaking up about microaggressions was a possible solution, for example a senior  
13 member of the medical school or a 'speak up' guardian. The idea of other students and staff being  
14 trained to act as allies or active bystanders was evident in participants' discourses.  
15  
16  
17  
18  
19  
20  
21

### 22 **'Someone like us'**

23 As noted earlier, participants frequently identified that as RM students, they felt they were learning  
24 to be doctors in a majority white environment and culture. Most participants reported that there  
25 was the need for more faculty members and students 'like us' from RM backgrounds. Participants  
26 reported that, in their experience, very few academic and faculty members were from RM groups.  
27 Extending the number of faculty members from RM groups was viewed as central to building an  
28 inclusive medical school.  
29  
30  
31  
32  
33  
34

35 Faculty members from RM backgrounds were identified as people that could understand the  
36 challenges that RM students faced. They were also people that participants said they felt more  
37 comfortable sharing experiences with or going to for support. The idea of 'having mentors that have  
38 been through similar difficulties and understood what it is like to be a BME student was also raised:  
39  
40  
41  
42

43 ... an increased number of medical staff from a minority background would be useful, 'cause I  
44 think at the moment we have like the one who is kind of responsible for like everything and I  
45 know it's, it probably is a lot of pressure on, on his head because now everything that  
46 happens with anyone, they, they kind of feel like he's the only person that they can talk to,  
47 so. (P8; Asian British Female)  
48

49 Because I agree like if we had someone to talk to as well but who is like us, like us being like  
50 minority. If we had someone to talk to who is similar to us that would just be so much, so  
51 much help. (P13; Asian British Male)  
52  
53

54 I think that's something that would genuinely really be helpful, but in, in also in the, in terms  
55 of having mentors that have been through it and understood what it's like to be a BME  
56 student. I, I often find that there are consultants, for example, who are BME who are able to  
57 support you and take the time to understand what you need better than some of the staff at  
58 the medical school. (P6; Asian British Male)  
59  
60

1  
2  
3 Having more peers from RM groups was also identified as central to building inclusive medical  
4 schools. Participants frequently commented that there should be more students 'like us' on medical  
5 school programmes and it was a commonly held perception that there were proportionally less  
6 students from RM backgrounds who were selected via admissions processes.  
7  
8  
9

10  
11 *... I think first and foremost what I would say, and it might not be possible, but just a more*  
12 *diverse cohort ... (P13; Asian British Male)*  
13

14 Several participants also highlighted the value of peer mentorship schemes that provided RM  
15 students with peer support networks:  
16  
17

18  
19 *I was just going to say one scheme that I think has really helped, that I think has been set up*  
20 *by students more than anything else, is the BME mentor scheme. (P14; Asian British Female)*  
21  
22

23 *That was my only outlet, was the BME mentor, and also I applied for I don't know number 2*  
24 *with your mentor, I applied for like you know the general mentors I put please, if possible you*  
25 *can they like be BME, and I did, and so my general parents from Med school. Anyway, my*  
26 *parents were BME, they were all Asian, so it kind of helped. (P13; Asian British Male)*  
27  
28

### 29 **Shifting the majority culture**

30 A common thread in all focus groups and mentioned by a high majority of participants was the need  
31 for major institutional change to both the curriculum and the institutional culture. Racial  
32 microaggressions from other students were commonly reported and participants voiced strongly  
33 that ongoing diversity, inclusivity, and anti-racism education for students was central to tackling  
34 microaggressions and building inclusive medical schools. Participants often appreciated the one-off  
35 diversity or anti-racism sessions provided by their medical schools, but as the quotes below  
36 illustrate, they felt that learning opportunities needed to be compulsory and threaded throughout  
37 the medical education programme  
38  
39  
40  
41  
42  
43

44 *... we had a, a talk on melanin medics at the beginning of the year and, and it was just*  
45 *basically they, I think they were talking about microaggressions and stuff like that and how*  
46 *uhm, how common it is and the, the impacts on people of colour. Um and it was just one talk*  
47 *and I feel like if they had maybe a few more throughout the year and if it was kind of more of*  
48 *a widespread thing, I think that could be really beneficial. (P17; Asian British Male)*  
49  
50

51 *Yeah, I think like just making these things compulsory and not just like didactic lectures like*  
52 *having some sort of back and forth engagement so you know the student on the other side is*  
53 *actually engaging with what's being taught, and is actually kind of participating in the*  
54 *material, if that makes sense. (P14; Asian British Female)*  
55  
56  
57  
58  
59  
60

1  
2  
3 Although an ongoing education programme was seen as important, there was a strongly held view in  
4 all the focus groups that tackling racial microaggressions and building a more inclusive medical  
5 school required structural changes within medical schools.  
6  
7  
8  
9

10 Participants in all of the focus groups highlighted that that there needed to be a shift in the majority  
11 culture so that racial microaggressions or any forms of racism were unacceptable:  
12

13  
14 *... at the bare minimum is to actually have a zero-tolerance policy for students and for staff...*  
15 *(P1; Mixed White/Black Female)*  
16

17  
18 *So, I think the problem isn't usually with the medics like themselves, or at least the Med*  
19 *school students overtly. It's usually either with the faculty or the patients ... (P15; Arab Male)*  
20

21  
22 *Uhm, I think beyond training, uh, a structural thing or an organisation thing that needs to be*  
23 *put on as an actual policy about how to deal with these kinds of situations, because there*  
24 *isn't one. (P2; Arab Female)*  
25

26 As the above illustrates shifting the majority culture was viewed as requiring widespread changes,  
27 including the introduction of policies at university and NHS Trust level that held people to account if  
28 their behaviour was unacceptable. Additionally, student-friendly complaints policies for reporting  
29 racist encounters and creating a culture within which people are able to speak up feel confident and  
30 supported to challenge other people's views and behaviours were seen as important.  
31  
32  
33  
34

## 35 DISCUSSION

36  
37 This qualitative study of UK GEM students from RM backgrounds has provided a greater  
38 understanding of the racial microaggressions experienced by medical students and its impact on  
39 learning and academic performance. To date, their lived experiences of racism during medical  
40 training have been underexplored, making it difficult to develop interventions. In the UK 37% of  
41 medical students identify as RM(50) and 44.3% of doctors identify as RM even though a significant  
42 number are International Medical Graduates(51). This study, to our knowledge, is the first to explore  
43 the racial microaggressions experienced by UK GEM students. Participants reported experiencing six  
44 types of racial microaggressions during their undergraduate training: assumptions of being foreign,  
45 assumptions of intellectual inferiority, denial of racial experiences, renaming, group labelling, and  
46 stereotyping. While some microaggressions could be experienced in both classroom and clinical  
47 environments, others were more commonly experienced in clinical environments and others tended  
48 to relate to the classroom/university environment.  
49  
50  
51  
52  
53  
54  
55  
56  
57  
58  
59  
60

1  
2  
3 Most students reported that regular experiences of racial microaggressions from peers, faculty,  
4 clinicians, and patients negatively impacted, directly and indirectly, on their learning, academic  
5 performance, and well-being. Students frequently reported feeling uncomfortable, out of place,  
6 guarded and worried in teaching sessions and clinical placements, where there was an assumption  
7 that RM students were 'foreign', and that Whiteness was the norm. This was perceived to be an  
8 additional mental burden that they felt was not experienced by their white counterparts. As  
9 described in cognitive load theory, this additional mental burden could be conceptualised as an  
10 extrinsic cognitive load, which has the potential to interfere with learning(52). Some participants felt  
11 invisible and ignored in placements and not being offered the same learning opportunities as their  
12 white counterparts. This led to poor access to learning experiences and disengagement from  
13 learning.  
14  
15  
16  
17  
18  
19  
20  
21  
22

23 Additionally, participants suggested that future interventions should focus on institutional changes  
24 they felt would promote inclusivity and develop a sense of belonging within medical schools.  
25 Proposed interventions included encouraging open conversations around racism to improve  
26 understanding of the experiences RM students; diversification of student and staff populations;  
27 additional faculty training; and changes to medical education curricula which should include a  
28 programme of anti-racism training and critical consciousness education to promote meaningful  
29 understandings about diversity, racism, and other forms of social inequality.  
30  
31  
32  
33  
34  
35  
36

37 This study makes a significant contribution to the medical education literature by building upon  
38 previous research(11, 27, 29, 53), and theorising about the causes of academic underperformance in  
39 RM students. Some of the findings from this study align with previous quantitative and qualitative  
40 studies of racial microaggressions in medical education. For example, the experiences of racial  
41 microaggressions occurred in both the clinical and non-clinical settings(30). These were similar to  
42 those reported in other studies, such as querying students' country of origin(12), mispronouncing  
43 names(32), assuming lower level of intellect compared to peers(11, 29), mistaken identity(12, 29,  
44 32), hyper-vigilance to threats of racism(31), and being ignored(12, 29). Moreover, the examples of  
45 racial microaggressions identified in this study are also akin to those described in the psychology  
46 literature(10, 54).  
47  
48  
49  
50  
51  
52  
53  
54

55 The wider literature on marginalised groups may aid understanding of the immediate consequences  
56 of racial microaggressions(55). Minority stress theory(56, 57) suggests that marginalised individuals  
57 experience high levels of stress because of prejudice and discrimination associated with their  
58  
59  
60

1  
2  
3 stigmatised identity, leading to long-term psychological and physiological outcomes. Sue and  
4 Spanierman also use the life-change model of stress to explain how the cumulative effect of  
5 experiencing racial microaggressions can negatively impact RM individuals' psychological and  
6  
7 physical health (58).  
8  
9

10  
11 The psychological impact of racial microaggressions has been alluded to in previous literature, for  
12 example having a negative impact on learning(11, 29), feelings of isolation, disengagement(59),  
13 experiencing an additional burden(11), and fewer clinical opportunities(12). However, a key tenet of  
14 our study compared to other studies is that its qualitative methodology and recruitment of students  
15 from medical schools across the UK, generated in-depth accounts from participants that shed light  
16 on the pathway from experiences of microaggressions to lower academic performance via damaging  
17 impacts on learning. Most other studies have failed to provide such in-depth narratives due to the  
18 adoption of survey methods and some are limited due to accounts from students in single medical  
19 schools only.  
20  
21  
22  
23  
24  
25  
26  
27

28 Previous studies in both the general and student populations have found the additional burden of  
29 racial microaggressions increases worry and lowers self-esteem(60) and can affect mental health  
30 and psychological wellbeing(24, 61, 62). However, in our study compared to some others, although  
31 mental wellbeing impacts were implied, impacts on mental health were not specifically investigated.  
32 Some quantitative medical education studies that have utilised validated measures of mental health  
33 have been able to explore the association between racial microaggressions and depression(27) and  
34 burnout(29).  
35  
36  
37  
38  
39  
40  
41

42 While most studies make recommendations for reducing microaggressions and racist experiences,  
43 medical students' views on strategies and policies for change are not well documented. Medical  
44 students in Ackerman-Barger et al's US study(11) highlighted the importance of promoting diversity  
45 and allyship, curriculum reform, open conversations, and safe spaces. Our study of UK GEM students  
46 identified similar themes but additionally, highlighted the importance of 'hear it and deal with it  
47 [microaggressions]' in the moment, at the point that they occur. It also emphasised the need to  
48 'shift the majority culture, with institutional change from the top to the bottom of the medical  
49 school.  
50  
51  
52  
53  
54  
55  
56  
57  
58  
59  
60



### Strengths and weaknesses

The use of online focus groups and group interviews encouraged frank responses and recollection was facilitated through discussion. Participants were able to build upon others' responses, providing further understanding of experiences and perspectives. The multi-cohort, multi-institutional data set also enabled the data to elicit narrative experiences from GEM students at various stages of undergraduate training.

Although recruitment of this study was targeted nationally, the largest proportion of study participants came from the same geographical region in the UK. This region, however, has the largest number of GEM students in the UK. As a result, the experiences described in this study may best reflect a specific region of the UK and it is not clear whether these findings would be replicated in other institutions. There was a greater predominance of female participants in our research (M:F 1:3), but RM groups were well represented. This may limit result transferability to male medical students; however, we note that intersectionality between multiple identities are likely to impact attainment in medicine(63). Moreover, we did not note any significant differences between the gender and ethnic groups in their reported experiences.

Conducting the focus groups/interviews online may have affected the rapport between the researchers and participants. While this may have also limited interactions between participants, it had the advantage of facilitating discussions between students from different areas of the country, which would have been difficult if face-to-face. Another limitation is that it some participants may have been fearful of expressing certain views or sharing sensitive personal experiences, whilst others may have dominated interviews and thus some topics may have been less discussed. As focus groups/interviews were made up of participants from different RM groups, when a student did not have anyone else from their own RM group in their focus group/interview, they may have felt less able to participate of express their views. Because the themes that emerged from the data were reliant on the chosen sample, alternative themes may have developed if the study had included more or different participants. Furthermore, participants may have had specific motives for participating, which may have influenced the topics that emerged in the focus groups/interviews.

Using reflexivity, the interviewers' identity characteristics and their status as fellow medical students, may have influenced the participants' discussion on specific topics. Participants' perceptions of the interviewers may have made them feel more at ease while discussing personal and sensitive topics. Other participants, on the other hand, may have found it difficult to explore

1  
2  
3 some issues in depth with a fellow student. While such influence cannot be quantified, and no  
4 participant expressed discomfort in discussing their experiences due to the interviewers' traits, it is  
5 still a possibility. It is also possible that individual research team members' experiences of medical  
6 education, racism and racial discrimination impacted data interpretation; those who experienced  
7 racism or racial discrimination may have been more likely to give precedence to student accounts of  
8 experiences that resembled their own.  
9  
10  
11  
12  
13  
14

15 As with other qualitative studies, generalisability is an inherent difficulty(64) and thus cannot be  
16 claimed. The aim of this study was not to provide generalisations, but to provide an exploration of  
17 racial microaggressions in medical education, with a view to inform future research and  
18 interventions. While it may have resonance for medical students and other health care students  
19 learning in similar social and cultural contexts(11, 65), our study findings are likely to promote  
20 reflection by medical school staff, clinicians, students, and other stakeholders.  
21  
22  
23  
24  
25  
26

### 27 **Implications of the study**

28 All medical students need a supportive, inclusive environment to learn and perform successfully.  
29 However, this can be difficult for RM students due to several factors. The high prevalence of racial  
30 microaggressions is evident. Racial microaggressions were easily recalled by students and they felt  
31 that these microaggressions negatively impacted their day-to-day experiences. Students were able  
32 to provide a variety of examples, which involved patients, faculty, peers, and clinicians. The racial  
33 microaggressions experienced were not isolated occurrences but instead, regularly occurred  
34 throughout students' undergraduate medical school journey. This repetitive nature could explain the  
35 additional mental burden students described, impeding both their wellbeing and ability to learn and  
36 perform well. Our work adds weight to the cognitive load theory, highlighted by Ackerman-Barger et  
37 al.(11), where the cognitive impact associated with microaggressions cumulatively builds up over  
38 time and impairs productivity, mental function, and relationships, impacting on RM students'  
39 learning, performance, and progression.  
40  
41  
42  
43  
44  
45  
46  
47  
48  
49

50 Our findings suggest that more needs to be done to support RM students and increase faculty's  
51 awareness of the difficulties they face. Both tailored student support for marginalised students and  
52 environments that foster inclusion, have been identified as potential factors to facilitate academic  
53 success(66, 67). Moreover, diversifying faculty is likely to assist with student support, develop a  
54 more inclusive environment, and may help increase awareness of the different forms of racism.  
55  
56  
57  
58  
59  
60

1  
2  
3 The prevalent belief that faculty had a general lack of awareness of this form of racism does not  
4 mean that medical schools were not starting to make progress on tackling racial microaggressions;  
5 however, our findings indicate that medical schools need to be more proactive in their anti-racist  
6 pedagogy and interventions. A lack of a systematic approach and consistent education on racial  
7 inequities and the effects of racism in the clinical environment was noted in this study. This suggests  
8 a need for strategic change and policy initiatives at all levels, including overarching institutional  
9 bodies, education and training councils and medical schools themselves. In the UK, the Medical  
10 Schools Councils' Equality, Diversity and Inclusion Alliance was recently formed with the specific aim  
11 to provide practical guidance to support medical schools to become fair, diverse and inclusive  
12 environments in which to study and work(68). We believe that an iterative component of the  
13 medical curriculum, specifically focused on equality, diversity and inclusion (EDI) issues should be  
14 developed, thus ensuring a number of key EDI topics are regularly revisited throughout the course so  
15 that students develop a critical consciousness(69) about diversity issues and racism. Moreover,  
16 guidance on how to deal with racial microaggressions in all learning environments as well as  
17 effective response strategies needs to be developed, to empower both recipients and bystanders.  
18 Furthermore, this and other studies suggests that medical schools should also review their anti-  
19 racism training for faculty.  
20  
21  
22  
23  
24  
25  
26  
27  
28  
29  
30  
31  
32

33 A lack of institutional accountability and policy enforcement by faculty were highlighted in this study  
34 and could dissuade students from reporting incidents and seeking support, therefore affecting their  
35 wellbeing and student experience. Our findings suggest that, in addition to training faculty and  
36 students, institutions should be dealing with student-reported experiences of racial  
37 microaggressions in a timely manner. This will likely restore students' trust in institutions, increase  
38 transparency and contribute towards creating equitable, inclusive learning environments for all  
39 students to thrive in. In the UK, small steps have been taken to address institutional accountability,  
40 for example, the introduction of BMA Racial Harassment Charter(70) and Advance HE Race Equality  
41 Charter(71).  
42  
43  
44  
45  
46  
47  
48  
49

50 While this study's participants attributed several mental health outcomes to experiencing racial  
51 microaggressions, none identified any physical health outcomes. Nonetheless, previous studies have  
52 highlighted the correlation between racial microaggressions and the activation of physiological  
53 stress responses, including the hypothalamic–pituitary–adrenal (HPA) axis and the sympathetic–  
54 adrenal–medullary axis (SAM)(72-75), suggesting that acute and chronic activations of the HPA and  
55 SAM axes could lead to several deleterious health outcomes(23, 75, 76).  
56  
57  
58  
59  
60

### Future research

This study highlights a gap in the medical education research literature related to understanding the impact of racism on students' educational experience, learning and academic performance. Further research is needed to critically examine models and interventions tackling racial microaggressions as well as exploration of institutional efforts to build inclusive learning environments within medical education. Exploration of other types of microaggressions based on protected characteristics, such as religion, sex, sexual orientation and disability and their impact on medical students' mental health, learning, academic performance, and retention would make worthy contributions to the field. This could be explored further by examining the impact of microaggressions and discrimination based on intersecting social identities, e.g., Black and female. Research into students and doctors' experiences of inclusion as well as institutional processes for promoting equity, diversity and belonging needs to be carried out.

Although, we have reported RM students as a collective group, we recognise that individuals are not homogenous. Experiences of racial microaggressions may vary between and within RM groups and further research is needed to identify how medical students from different RM groups experience, and are impacted by, racial microaggressions.

### CONCLUSION

This is the first study exploring UK GEM students' experiences of racial microaggressions. It extends current knowledge of medical students' experiences of microaggressions and their impact on students' attainment, highlighting how these impacts are evident in an education and health care system beyond the US. In this study, students from RM backgrounds reported recurrent experiences of racial microaggressions that impeded their learning, academic performance, and well-being. Efforts and future interventions focusing on institutional changes to diversify student and staff populations; encouraging open, transparent conversations around racism including racial microaggressions; and promptly managing any student-reported racial experiences are likely to be key to shift the culture to proactively foster inclusive learning environments. As more students from RM backgrounds enter the medical profession, educators should actively aim to remove barriers to learning by supporting students to thrive and reach their full academic potential. Institutions have a responsibility to directly address all forms of racism, including microaggressions. This study highlights salient issues to be considered by all stakeholders of medical education.

1  
2  
3 **Funding:** 'This research received no specific grant from any funding agency in the public, commercial  
4 or not-for-profit sectors'.  
5  
6

7  
8 **No competing interests:** *"All authors have completed the ICMJE uniform disclosure form at*  
9 *www.icmje.org/coi-disclosure.pdf and declare: no support from any organisation for the submitted*  
10 *work; no financial relationships with any organisations that might have an interest in the submitted*  
11 *work in the previous three years; no other relationships or activities that could appear to have*  
12 *influenced the submitted work."*  
13  
14  
15  
16

17  
18 **Author contributions:** NM conceived of the research project. NM designed the research project  
19 under the supervision of CMB. TZ and GW collected the data. NM, CMB and OS analysed the data.  
20 All authors interpreted the data. NM, TZ, OS and CMB wrote the first draft of the article, and all  
21 authors revised it critically for important intellectual content. NM, CMB and OS revised the draft  
22 paper. All authors approved of the final version to be published. NM is the guarantor.  
23  
24  
25  
26  
27

28 **Ethical approval:** Ethical approval was granted by The University of Warwick Biomedical and  
29 Scientific Research Ethics Committee (BSREC 17/20-21)  
30  
31  
32

33 **Participants consent:** All participants gave informed consent.  
34  
35

36 **Data sharing statement:** No additional data are available as data are held in safe haven.  
37  
38  
39

40 **Provenance and peer review:** Not commissioned; externally peer reviewed.  
41  
42

43 **Transparency statement:** NM affirms that the manuscript is an honest, accurate, and transparent  
44 account of the study being reported; that no important aspects of the study have been omitted; and  
45 that any discrepancies from the study as originally planned (and, if relevant, registered) have been  
46 explained.  
47  
48  
49  
50  
51  
52  
53  
54  
55  
56  
57  
58  
59  
60

## References

1. Woolf K. Differential attainment in medical education and training. *BMJ*. 2020;368:m339.
2. Woolf K, McManus IC, Potts HW, Dacre J. The mediators of minority ethnic underperformance in final medical school examinations. *Br J Educ Psychol*. 2013;83(Pt 1):135-59.
3. McManus IC, Richards P, Winder BC, Sproston KA. Final examination performance of medical students from ethnic minorities. *Med Educ*. 1996;30(3):195-200.
4. Wass V, Roberts C, Hoogenboom R, Jones R, Van der Vleuten C. Effect of ethnicity on performance in a final objective structured clinical examination: qualitative and quantitative study. *BMJ*. 2003;326(7393):800-3.
5. Fyfe M, Horsburgh J, Blitz J, Chiavaroli N, Kumar S, Cleland J. The do's, don'ts and don't knows of redressing differential attainment related to race/ethnicity in medical schools. *Perspect Med Educ*. 2022;11(1):1-14.
6. Williams DR, Mohammed SA. Discrimination and racial disparities in health: evidence and needed research. *Journal of Behavioral Medicine*. 2009;32(1):20-47.
7. Williams DR, Lawrence JA, Davis BA. Racism and health: evidence and needed research. *Annual review of public health*. 2019;40:105-25.
8. Neville P. When I say ... everyday racism. *Med Educ*. 2022;56(3):260-1.
9. Bullock JL, O'Brien MT, Minhas PK, Fernandez A, Lupton KL, Hauer KE. No One Size Fits All: A Qualitative Study of Clerkship Medical Students' Perceptions of Ideal Supervisor Responses to Microaggressions. *Academic Medicine*. 2021;96(11S):S71-S80.
10. Sue DW, Capodilupo CM, Torino GC, Bucceri JM, Holder AM, Nadal KL, et al. Racial microaggressions in everyday life: implications for clinical practice. *Am Psychol*. 2007;62(4):271-86.
11. Ackerman-Barger K, Boatright D, Gonzalez-Colaso R, Orozco R, Latimore D. Seeking Inclusion Excellence: Understanding Racial Microaggressions as Experienced by Underrepresented Medical and Nursing Students. *Acad Med*. 2020;95(5):758-63.
12. Kristoffersson E, Rönqvist H, Andersson J, Bengs C, Hamberg K. "It was as if I wasn't there" – Experiences of everyday racism in a Swedish medical school. *Social Science and Medicine*. 2021;270.
13. Smith WA, Franklin JD, Hung M. The Impact of Racial Microaggressions Across Educational Attainment for African Americans. *Journal of Minority Achievement, Creativity, and Leadership*. 2020;1(1):70-93.
14. Nadal KL, Wong Y, Griffin KE, Davidoff K, Sriken J. The adverse impact of racial microaggressions on college students' self-esteem. *Journal of college student development*. 2014;55(5):461-74.
15. Suárez-Orozco C, Casanova S, Martin M, Katsiaficas D, Cuellar V, Smith NA, et al. Toxic Rain in Class: Classroom Interpersonal Microaggressions. *Educational Researcher*. 2015;44(3):151-60.
16. Kohli R, Solórzano DG. Teachers, please learn our names!: racial microaggressions and the K-12 classroom. *Race Ethnicity and Education*. 2012;15(4):441-62.
17. Harwood SA, Hunt MB, Mendenhall R, Lewis JA. Racial microaggressions in the residence halls: Experiences of students of color at a predominantly White university. *Journal of Diversity in Higher Education*. 2012;5(3):159.

18. Huynh VW. Ethnic microaggressions and the depressive and somatic symptoms of Latino and Asian American adolescents. *Journal of youth and adolescence*. 2012;41(7):831-46.
19. Sue DW. *Microaggressions in everyday life: Race, gender, and sexual orientation*: John Wiley & Sons; 2010.
20. Yosso T, Smith W, Ceja M, Solórzano D. Critical race theory, racial microaggressions, and campus racial climate for Latina/o undergraduates. *Harvard Educational Review*. 2009;79(4):659-91.
21. Solorzano D, Ceja M, Yosso T. Critical race theory, racial microaggressions, and campus racial climate: The experiences of African American college students. *Journal of Negro education*. 2000:60-73.
22. Torino GC, Rivera DP, Capodilupo CM, Nadal KL, Sue DW. Everything You Wanted to Know About Microaggressions but Didn't Get a Chance to Ask. In: Torino GC, Rivera DP, Capodilupo CM, Nadal KL, Sue DW, editors. *Microaggression Theory: Influence and Implications*: John Wiley & Sons, Inc.; 2018. p. 1-15.
23. Zeiders KH, Landor AM, Flores M, Brown A. Microaggressions and Diurnal Cortisol: Examining Within-Person Associations Among African-American and Latino Young Adults. *J Adolesc Health*. 2018;63(4):482-8.
24. Torres L, Driscoll MW, Burrow AL. Microaggressions and psychological functioning among high achieving African-Americans: A mixed-methods approach. *Journal of Social and Clinical Psychology*. 2010.
25. Blume AW, Lovato LV, Thyken BN, Denny N. The relationship of microaggressions with alcohol use and anxiety among ethnic minority college students in a historically White institution. *Cultural diversity and ethnic minority psychology*. 2012;18(1):45.
26. Ackerman-Barger K, London M, White D. When an Omitted Curriculum Becomes A Hidden Curriculum: Let's Teach to Promote Health Equity. *Journal of Health Care for the Poor and Underserved*. 2020;31(4):182-92.
27. Anderson N, Lett E, Asabor EN, Hernandez AL, Nguemeni Tiako MJ, Johnson C, et al. The Association of Microaggressions with Depressive Symptoms and Institutional Satisfaction Among a National Cohort of Medical Students. *J Gen Intern Med*. 2022;37(2):298-307.
28. Brown C, Daniel R, Addo N, Knight S. The experiences of medical students, residents, fellows, and attendings in the emergency department: Implicit bias to microaggressions. *Aem Education and Training*. 2021;5:S49-S56.
29. Chisholm LP, Jackson KR, Davidson HA, Churchwell AL, Fleming AE, Drolet BC. Evaluation of Racial Microaggressions Experienced During Medical School Training and the Effect on Medical Student Education and Burnout: A Validation Study. *Journal of the National Medical Association*. 2021;113(3):310-4.
30. Espaillet A, Panna DK, Goede DL, Gurka MJ, Novak MA, Zaidi Z. An exploratory study on microaggressions in medical school: What are they and why should we care? *Perspect Med Educ*. 2019;8(3):143-51.
31. Kristoffersson E, Hamberg K. "I have to do twice as well" - managing everyday racism in a Swedish medical school. *Bmc Medical Education*. 2022;22(1).
32. Strayhorn TL. Exploring the Role of Race in Black Males' Sense of Belonging in Medical School: A Qualitative Pilot Study. *Medical Science Educator*. 2020;30(4):1383-7.
33. Morrison N, Machado M, Blackburn C. Student perspectives on barriers to performance for black and minority ethnic graduate-entry medical students: a qualitative study in a West Midlands medical school. *BMJ Open*. 2019;9(11):e032493.

- 1
  - 2
  - 3
  - 4
  - 5
  - 6
  - 7
  - 8
  - 9
  - 10
  - 11
  - 12
  - 13
  - 14
  - 15
  - 16
  - 17
  - 18
  - 19
  - 20
  - 21
  - 22
  - 23
  - 24
  - 25
  - 26
  - 27
  - 28
  - 29
  - 30
  - 31
  - 32
  - 33
  - 34
  - 35
  - 36
  - 37
  - 38
  - 39
  - 40
  - 41
  - 42
  - 43
  - 44
  - 45
  - 46
  - 47
  - 48
  - 49
  - 50
  - 51
  - 52
  - 53
  - 54
  - 55
  - 56
  - 57
  - 58
  - 59
  - 60
34. Equality & Human Rights Commission. What equality law means for you as an education provider – further and higher education: Equality and Human Rights Commission; 2014 [Available from: [https://www.equalityhumanrights.com/sites/default/files/what\\_equality\\_law\\_means\\_for\\_you\\_as\\_an\\_education\\_provider\\_further\\_and\\_higher\\_education.pdf](https://www.equalityhumanrights.com/sites/default/files/what_equality_law_means_for_you_as_an_education_provider_further_and_higher_education.pdf)].
35. Kumwenda B, Cleland J, Greatrix R, MacKenzie RK, Prescott G. Are efforts to attract graduate applicants to UK medical schools effective in increasing the participation of under-represented socioeconomic groups? A national cohort study. *BMJ Open*. 2018;8(2):e018946.
36. LeCompte MD, Schensul JJ. Designing and conducting ethnographic research: An introduction: Rowman Altamira; 2010.
37. Sarfo-Annin JK. Ethnic inclusion in medicine: the ineffectiveness of the ‘Black, Asian and Minority Ethnic’ metric to measure progress. *BJGP open*. 2020;4(5).
38. Milner A, Jumbe S. Using the right words to address racial disparities in COVID-19. *The Lancet Public Health*. 2020;5(8):e419.
39. Gunaratnam Y. *Researching Race and Ethnicity*. London 2003. Available from: <https://methods.sagepub.com/book/researching-race-and-ethnicity>.
40. Kaufman DM. Teaching and Learning in Medical Education: How Theory Can Inform Practice. *Understanding Medical Education: Evidence, Theory, and Practice* 2018. p. 37-69.
41. Kiger ME, Varpio L. Thematic analysis of qualitative data: AMEE Guide No. 131. *Med Teach*. 2020;42(8):846-54.
42. Braun V, Clarke V. Using thematic analysis in psychology. *Qualitative Research in Psychology*. 2006;3(2):77-101.
43. Braun V, Clarke V. Thematic analysis. *APA handbook of research methods in psychology, Vol 2: Research designs: Quantitative, qualitative, neuropsychological, and biological*. APA handbooks in psychology®. Washington, DC, US: American Psychological Association; 2012. p. 57-71.
44. Varpio L, Ajjawi R, Monrouxe LV, O'Brien BC, Rees CE. Shedding the cobra effect: problematising thematic emergence, triangulation, saturation and member checking. *Med Educ*. 2017;51(1):40-50.
45. UK Government. List of ethnic groups: 2011 Census UK: UK Government; 2021 [Available from: <https://www.ethnicity-facts-figures.service.gov.uk/style-guide/ethnic-groups#2011-census>].
46. QSR International Pty Ltd. NVivo Version Release 1.6.2. 2022.
47. Patton MQ. Enhancing the quality and credibility of qualitative analysis. *Health Serv Res*. 1999;34(5 Pt 2):1189-208.
48. Barbour RS. Checklists for improving rigour in qualitative research: a case of the tail wagging the dog? *BMJ*. 2001;322(7294):1115-7.
49. O'Brien BC, Harris IB, Beckman TJ, Reed DA, Cook DA. Standards for reporting qualitative research: a synthesis of recommendations. *Acad Med*. 2014;89(9):1245-51.
50. Higher Education Statistics Agency (HESA). Table 42 - UK domiciled qualifiers by subject of study and ethnicity 2019/20 to 2021/22 HE Student Data UK: Higher Education Statistics Agency (HESA); 2023 [Available from: <https://www.hesa.ac.uk/data-and-analysis/students/table-42>].
51. UK Government. NHS Workforce UK: UK Government; 2020 [Available from: <https://www.ethnicity-facts-figures.service.gov.uk/workforce-and-business/workforce-diversity/nhs-workforce/latest>].



- 1
- 2
- 3
- 4 52. Young JQ, Van Merriënboer J, Durning S, Ten Cate O. Cognitive Load Theory: implications for medical education: AMEE Guide No. 86. *Med Teach*. 2014;36(5):371-84.
- 5
- 6 53. Gilliam C, Russell CJ. Impact of racial microaggressions in the clinical learning environment and review of best practices to support learners. *Curr Probl Pediatr Adolesc Health Care*. 2021;51(10):101090.
- 7
- 8
- 9 54. Williams MT, Skinta MD, Martin-Willett R. After Pierce and Sue: A Revised Racial Microaggressions Taxonomy. *Perspectives on Psychological Science*. 2021;16(5):991-1007.
- 10
- 11 55. Wong G, Derthick AO, David EJ, Saw A, Okazaki S. The What, the Why, and the How: A Review of Racial Microaggressions Research in Psychology. *Race Soc Probl*. 2014;6(2):181-200.
- 12
- 13
- 14 56. Harrell SP. A multidimensional conceptualization of racism-related stress: implications for the well-being of people of color. *Am J Orthopsychiatry*. 2000;70(1):42-57.
- 15
- 16 57. Meyer IH. Prejudice, social stress, and mental health in lesbian, gay, and bisexual populations: conceptual issues and research evidence. *Psychol Bull*. 2003;129(5):674-97.
- 17
- 18 58. Sue DW, Spanierman LB. *Microaggressions in everyday life*, 2nd ed. Hoboken, NJ, US: John Wiley & Sons, Inc.; 2020. xx, 349-xx, p.
- 19
- 20 59. Teshome BG, Desai MM, Gross CP, Hill KA, Li F, Samuels EA, et al. Marginalized identities, mistreatment, discrimination, and burnout among US medical students: cross sectional survey and retrospective cohort study. *BMJ*. 2022;376:e065984.
- 21
- 22 60. Wong-Padoongpatt G, Zane N, Okazaki S, Saw A. Decreases in implicit self-esteem explain the racial impact of microaggressions among Asian Americans. *J Couns Psychol*. 2017;64(5):574-83.
- 23
- 24 61. Huynh VW. Ethnic microaggressions and the depressive and somatic symptoms of Latino and Asian American adolescents. *J Youth Adolesc*. 2012;41(7):831-46.
- 25
- 26 62. Teherani A, Hauer KE, Fernandez A, King TE, Jr., Lucey C. How Small Differences in Assessed Clinical Performance Amplify to Large Differences in Grades and Awards: A Cascade With Serious Consequences for Students Underrepresented in Medicine. *Acad Med*. 2018;93(9):1286-92.
- 27
- 28 63. Tsouroufli M, Rees CE, Monrouxe LV, Sundaram V. Gender, identities and intersectionality in medical education research. *Med Educ*. 2011;45(3):213-6.
- 29
- 30 64. Cohen L, Manion L, Morrison K. *Research Methods in Education*. New York: Routledge; 2018.
- 31
- 32 65. Sandoval RS, Afolabi T, Said J, Dunleavy S, Chatterjee A, Olveczky D. Building a Tool Kit for Medical and Dental Students: Addressing Microaggressions and Discrimination on the Wards. *MedEdPORTAL*. 2020;16:10893.
- 33
- 34 66. Isik U, Wouters A, Croiset G, Kusurkar RA. "What kind of support do I need to be successful as an ethnic minority medical student?" A qualitative study. *BMC Med Educ*. 2021;21(1):6.
- 35
- 36 67. Dickins K, Levinson D, Smith SG, Humphrey HJ. The minority student voice at one medical school: lessons for all? *Acad Med*. 2013;88(1):73-9.
- 37
- 38 68. Medical Schools Council. MSC ED&I Alliance London: Medical Schools Council; 2021 [Available from: <https://www.medschools.ac.uk/our-work/equality-diversity-inclusion/msc-edi-alliance>].
- 39
- 40 69. Kumagai AK, Lyson ML. Beyond cultural competence: critical consciousness, social justice, and multicultural education. *Acad Med*. 2009;84(6):782-7.
- 41
- 42
- 43
- 44
- 45
- 46
- 47
- 48
- 49
- 50
- 51
- 52
- 53
- 54
- 55
- 56
- 57
- 58
- 59
- 60

- 1  
2  
3  
4  
5  
6  
7  
8  
9  
10  
11  
12  
13  
14  
15  
16  
17  
18  
19  
20  
21  
22  
23  
24  
25  
26  
27  
28  
29  
30  
31  
32  
33  
34  
35  
36  
37  
38  
39  
40  
41  
42  
43  
44  
45  
46  
47  
48  
49  
50  
51  
52  
53  
54  
55  
56  
57  
58  
59  
60
70. British Medical Association. A charter for medical schools to prevent and address racial harassment London: British Medical Association; 2020 [Available from: <https://www.bma.org.uk/media/2030/bma-med-school-charter-implementation.pdf>].
71. Advance HE. Race Equality Charter York: Advance HE; 2020 [Available from: <https://www.advance-he.ac.uk/equality-charters/race-equality-charter>].
72. Huynh VW, Huynh QL, Stein MP. Not just sticks and stones: Indirect ethnic discrimination leads to greater physiological reactivity. *Cultur Divers Ethnic Minor Psychol*. 2017;23(3):425-34.
73. Majeno A, Urizar GG, Halim MLD, Nguyen-Rodriguez ST, Gonzalez A. Examining the role of ethnic microaggressions and ethnicity on cortisol responses to an acute stressor among young adults. *Cultur Divers Ethnic Minor Psychol*. 2021;27(1):135-44.
74. Seaton EK, Zeiders KH. Daily racial discrimination experiences, ethnic-racial identity, and diurnal cortisol patterns among Black adults. *Cultur Divers Ethnic Minor Psychol*. 2021;27(1):145-55.
75. Berger M, Sarnyai Z. "More than skin deep": stress neurobiology and mental health consequences of racial discrimination. *Stress*. 2015;18(1):1-10.
76. Jadotte Y, Salmond S, Allread V. A Population Health Perspective on Racism and Racial Microaggressions. *Orthop Nurs*. 2022;41(2):148-57.

1  
2  
3 **Figures**  
4

5 Figure 1: Participants' Demographics  
6

7 Figure 2: Domains and Themes  
8  
9  
10  
11  
12  
13  
14  
15  
16  
17  
18  
19  
20  
21  
22  
23  
24  
25  
26  
27  
28  
29  
30  
31  
32  
33  
34  
35  
36  
37  
38  
39  
40  
41  
42  
43  
44  
45  
46  
47  
48  
49  
50  
51  
52  
53  
54  
55  
56  
57  
58  
59  
60

For peer review only

Figure 1: Participants' demographics

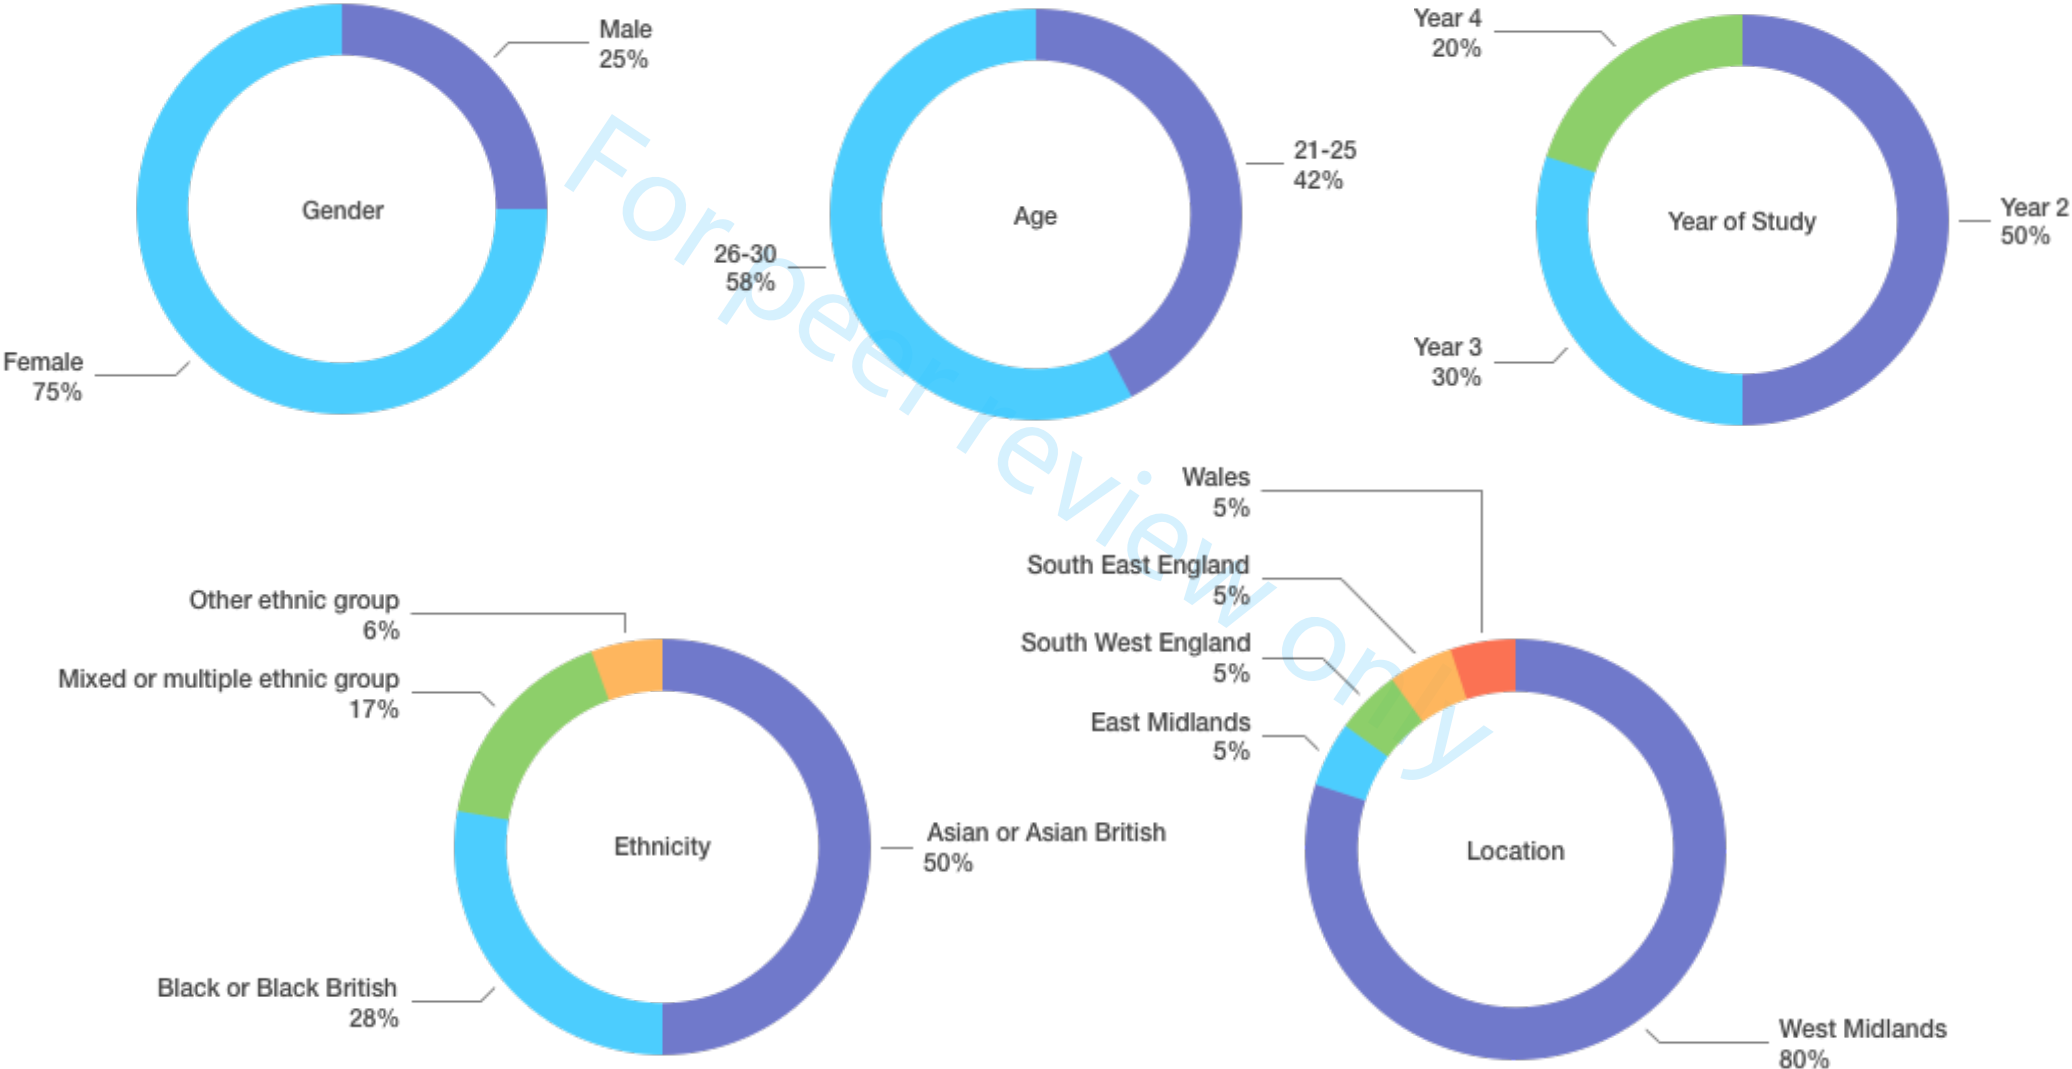

1  
2  
3  
4 **Figure 2: Domains and Themes**  
5  
6

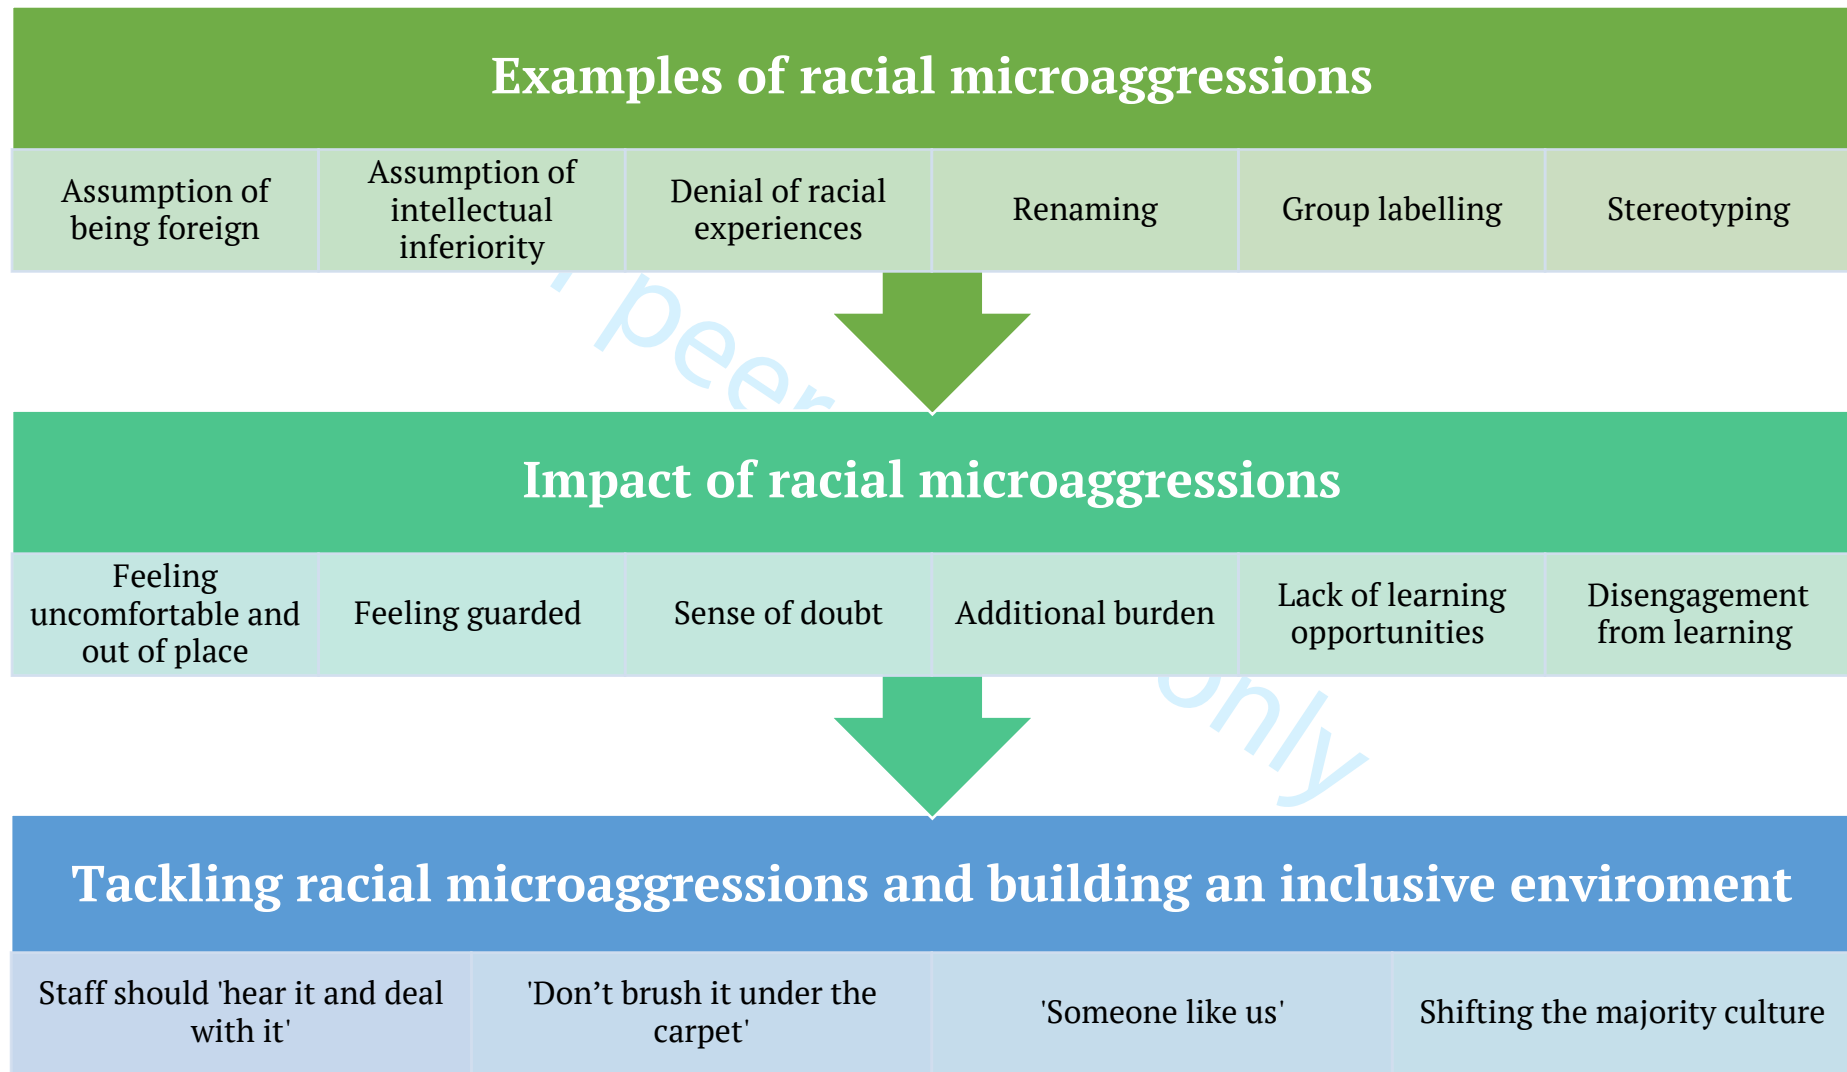

Supplemental material for "Where are you really from?": A qualitative study of racial microaggressions and the impact on medical students in the United Kingdom

## **INTERVIEW SCHEDULE**

Preamble: *Thank you for joining us for this focus group. As you know, we are studying racial microaggressions as experienced by graduate-entry medical students such as yourselves. Racial microaggressions are brief and commonplace daily verbal, behavioural, or environmental indignities that communicate hostile, derogatory, or negative racial slights towards people of colour. The purpose of this study is to contribute student perspectives to the body of knowledge related to promoting student success in medical schools. Greater understanding of how microaggressions are experienced can lead to increased student support to help them reach their full academic potential.*

1. Have you experienced racial microaggressions during your time at medical school? If so, would you describe the circumstances?
2. Describe the feelings you had while receiving racial microaggressions.
3. What impact have racial microaggressions had on you?
4. Do you think racial microaggressions have impacted your learning and performance at medical school? If so, can you explain how racial microaggressions have impacted your learning and performance?
5. Visualise the ideal inclusive environment in your school. What would need to change in interactions and relationships to create this environment? What would need to change structurally or organizationally to create an inclusive environment?
6. Can you think of anything else your medical school can do to specifically support students from racially minoritised backgrounds?

Thank you very much for your participation and time.

As I said earlier, the information you have given me will be anonymised and held only by the research team.

# Standards for Reporting Qualitative Research (SRQR)\*

<http://www.equator-network.org/reporting-guidelines/srqr/>

Page/line  
no(s).

## Title and abstract

|                                                                                                                                                                                                                                                       |   |
|-------------------------------------------------------------------------------------------------------------------------------------------------------------------------------------------------------------------------------------------------------|---|
| <b>Title</b> - Concise description of the nature and topic of the study Identifying the study as qualitative or indicating the approach (e.g., ethnography, grounded theory) or data collection methods (e.g., interview, focus group) is recommended | 1 |
| <b>Abstract</b> - Summary of key elements of the study using the abstract format of the intended publication; typically includes background, purpose, methods, results, and conclusions                                                               | 3 |

## Introduction

|                                                                                                                                                              |     |
|--------------------------------------------------------------------------------------------------------------------------------------------------------------|-----|
| <b>Problem formulation</b> - Description and significance of the problem/phenomenon studied; review of relevant theory and empirical work; problem statement | 5-7 |
| <b>Purpose or research question</b> - Purpose of the study and specific objectives or questions                                                              | 5-7 |

## Methods

|                                                                                                                                                                                                                                                                                                                                                                                                      |         |
|------------------------------------------------------------------------------------------------------------------------------------------------------------------------------------------------------------------------------------------------------------------------------------------------------------------------------------------------------------------------------------------------------|---------|
| <b>Qualitative approach and research paradigm</b> - Qualitative approach (e.g., ethnography, grounded theory, case study, phenomenology, narrative research) and guiding theory if appropriate; identifying the research paradigm (e.g., postpositivist, constructivist/ interpretivist) is also recommended; rationale**                                                                            | 7       |
| <b>Researcher characteristics and reflexivity</b> - Researchers' characteristics that may influence the research, including personal attributes, qualifications/experience, relationship with participants, assumptions, and/or presuppositions; potential or actual interaction between researchers' characteristics and the research questions, approach, methods, results, and/or transferability | 7,23-24 |
| <b>Context</b> - Setting/site and salient contextual factors; rationale**                                                                                                                                                                                                                                                                                                                            | 8       |
| <b>Sampling strategy</b> - How and why research participants, documents, or events were selected; criteria for deciding when no further sampling was necessary (e.g., sampling saturation); rationale**                                                                                                                                                                                              | 8       |
| <b>Ethical issues pertaining to human subjects</b> - Documentation of approval by an appropriate ethics review board and participant consent, or explanation for lack thereof; other confidentiality and data security issues                                                                                                                                                                        | 8       |
| <b>Data collection methods</b> - Types of data collected; details of data collection procedures including (as appropriate) start and stop dates of data collection and analysis, iterative process, triangulation of sources/methods, and modification of procedures in response to evolving study findings; rationale**                                                                             | 8       |
| <b>Data collection instruments and technologies</b> - Description of instruments (e.g., interview guides, questionnaires) and devices (e.g., audio recorders) used for data collection; if/how the instrument(s) changed over the course of the study                                                                                                                                                | 8       |
| <b>Units of study</b> - Number and relevant characteristics of participants, documents, or events included in the study; level of participation (could be reported in results)                                                                                                                                                                                                                       | 8       |
| <b>Data processing</b> - Methods for processing data prior to and during analysis, including transcription, data entry, data management and security, verification of data integrity, data coding, and anonymization/de-identification of excerpts                                                                                                                                                   | 8       |

|                  |                                                                                                                                                                                                                       |     |
|------------------|-----------------------------------------------------------------------------------------------------------------------------------------------------------------------------------------------------------------------|-----|
| 1<br>2<br>3<br>4 | <b>Data analysis</b> - Process by which inferences, themes, etc., were identified and developed, including the researchers involved in data analysis; usually references a specific paradigm or approach; rationale** | 8-9 |
| 5<br>6<br>7      | <b>Techniques to enhance trustworthiness</b> - Techniques to enhance trustworthiness and credibility of data analysis (e.g., member checking, audit trail, triangulation); rationale**                                | 9   |

## Results/findings

|                |                                                                                                                                                                                                   |      |
|----------------|---------------------------------------------------------------------------------------------------------------------------------------------------------------------------------------------------|------|
| 10<br>11<br>12 | <b>Synthesis and interpretation</b> - Main findings (e.g., interpretations, inferences, and themes); might include development of a theory or model, or integration with prior research or theory | 9-20 |
| 13<br>14       | <b>Links to empirical data</b> - Evidence (e.g., quotes, field notes, text excerpts, photographs) to substantiate analytic findings                                                               | 9-20 |

## Discussion

|                                        |                                                                                                                                                                                                                                                                                                                                                                                                             |       |
|----------------------------------------|-------------------------------------------------------------------------------------------------------------------------------------------------------------------------------------------------------------------------------------------------------------------------------------------------------------------------------------------------------------------------------------------------------------|-------|
| 17<br>18<br>19<br>20<br>21<br>22<br>23 | <b>Integration with prior work, implications, transferability, and contribution(s) to the field</b> - Short summary of main findings; explanation of how findings and conclusions connect to, support, elaborate on, or challenge conclusions of earlier scholarship; discussion of scope of application/generalizability; identification of unique contribution(s) to scholarship in a discipline or field | 20-26 |
| 24                                     | <b>Limitations</b> - Trustworthiness and limitations of findings                                                                                                                                                                                                                                                                                                                                            | 23-24 |

## Other

|                |                                                                                                                                               |    |
|----------------|-----------------------------------------------------------------------------------------------------------------------------------------------|----|
| 27<br>28<br>29 | <b>Conflicts of interest</b> - Potential sources of influence or perceived influence on study conduct and conclusions; how these were managed | 27 |
| 30<br>31<br>32 | <b>Funding</b> - Sources of funding and other support; role of funders in data collection, interpretation, and reporting                      | 27 |

\*The authors created the SRQR by searching the literature to identify guidelines, reporting standards, and critical appraisal criteria for qualitative research; reviewing the reference lists of retrieved sources; and contacting experts to gain feedback. The SRQR aims to improve the transparency of all aspects of qualitative research by providing clear standards for reporting qualitative research.

\*\*The rationale should briefly discuss the justification for choosing that theory, approach, method, or technique rather than other options available, the assumptions and limitations implicit in those choices, and how those choices influence study conclusions and transferability. As appropriate, the rationale for several items might be discussed together.

### Reference:

O'Brien BC, Harris IB, Beckman TJ, Reed DA, Cook DA. **Standards for reporting qualitative research: a synthesis of recommendations.** *Academic Medicine*, Vol. 89, No. 9 / Sept 2014  
DOI: [10.1097/ACM.0000000000000388](https://doi.org/10.1097/ACM.0000000000000388)



# BMJ Open

## "Where are you really from?": A qualitative study of racial microaggressions and the impact on medical students in the United Kingdom

|                                 |                                                                                                                                                                                                                                                                                                                                                                                                                                                                                                                                     |
|---------------------------------|-------------------------------------------------------------------------------------------------------------------------------------------------------------------------------------------------------------------------------------------------------------------------------------------------------------------------------------------------------------------------------------------------------------------------------------------------------------------------------------------------------------------------------------|
| Journal:                        | <i>BMJ Open</i>                                                                                                                                                                                                                                                                                                                                                                                                                                                                                                                     |
| Manuscript ID                   | bmjopen-2022-069009.R2                                                                                                                                                                                                                                                                                                                                                                                                                                                                                                              |
| Article Type:                   | Original research                                                                                                                                                                                                                                                                                                                                                                                                                                                                                                                   |
| Date Submitted by the Author:   | 31-Mar-2023                                                                                                                                                                                                                                                                                                                                                                                                                                                                                                                         |
| Complete List of Authors:       | Morrison, Nariell; University of Warwick Warwick Medical School, Clinical Trials Unit; University of Oxford, Department of Education<br>Zaman, Tabbasum; University of Warwick Warwick Medical School, Division of Health Sciences<br>Webster, Georgia; University of Warwick Warwick Medical School, Division of Health Sciences<br>Sorinola, Olanrewaju; University of Warwick Warwick Medical School, Division of Health Sciences<br>Blackburn, Clare; University of Warwick Warwick Medical School, Division of Health Sciences |
| <b>Primary Subject Heading</b>: | Medical education and training                                                                                                                                                                                                                                                                                                                                                                                                                                                                                                      |
| Secondary Subject Heading:      | Qualitative research                                                                                                                                                                                                                                                                                                                                                                                                                                                                                                                |
| Keywords:                       | MEDICAL EDUCATION & TRAINING, QUALITATIVE RESEARCH, EDUCATION & TRAINING (see Medical Education & Training)                                                                                                                                                                                                                                                                                                                                                                                                                         |
|                                 |                                                                                                                                                                                                                                                                                                                                                                                                                                                                                                                                     |

SCHOLARONE™  
Manuscripts



I, the Submitting Author has the right to grant and does grant on behalf of all authors of the Work (as defined in the below author licence), an exclusive licence and/or a non-exclusive licence for contributions from authors who are: i) UK Crown employees; ii) where BMJ has agreed a CC-BY licence shall apply, and/or iii) in accordance with the terms applicable for US Federal Government officers or employees acting as part of their official duties; on a worldwide, perpetual, irrevocable, royalty-free basis to BMJ Publishing Group Ltd ("BMJ") its licensees and where the relevant Journal is co-owned by BMJ to the co-owners of the Journal, to publish the Work in this journal and any other BMJ products and to exploit all rights, as set out in our [licence](#).

The Submitting Author accepts and understands that any supply made under these terms is made by BMJ to the Submitting Author unless you are acting as an employee on behalf of your employer or a postgraduate student of an affiliated institution which is paying any applicable article publishing charge ("APC") for Open Access articles. Where the Submitting Author wishes to make the Work available on an Open Access basis (and intends to pay the relevant APC), the terms of reuse of such Open Access shall be governed by a Creative Commons licence – details of these licences and which [Creative Commons](#) licence will apply to this Work are set out in our licence referred to above.

Other than as permitted in any relevant BMJ Author's Self Archiving Policies, I confirm this Work has not been accepted for publication elsewhere, is not being considered for publication elsewhere and does not duplicate material already published. I confirm all authors consent to publication of this Work and authorise the granting of this licence.

1  
2  
3  
4  
5  
6  
7  
8  
9

## **“Where are you *really* from?”: A qualitative study of racial microaggressions and the impact on medical students in the United Kingdom**

10  
11  
12  
13  
14  
15  
16  
17  
18  
19

**Authors:**

**Nariell Morrison**

Honorary Clinical Research Fellow  
Clinical Trials Unit  
Warwick Medical School  
University of Warwick  
Coventry, UK

MSc student

Department of Education  
University of Oxford  
Oxford, UK

26  
27  
28  
29  
30  
31  
32  
33  
34

**Tabbasum Zaman**

MBChB student  
Division of Health Sciences  
Warwick Medical School  
University of Warwick  
Coventry, UK

35  
36  
37  
38  
39  
40  
41  
42  
43

**Georgia Webster**

MBChB student  
Division of Health Sciences  
Warwick Medical School  
University of Warwick  
Coventry, UK

44  
45  
46  
47  
48  
49  
50  
51  
52

**Olanrewaju Sorinola**

Professor  
Division of Health Sciences  
Warwick Medical School  
University of Warwick  
Coventry, UK

53  
54  
55  
56  
57  
58  
59  
60

**Clare M Blackburn**

Associate Professor  
Division of Health Sciences  
Warwick Medical School  
University of Warwick  
Coventry, UK

1  
2  
3  
4 **Corresponding Author:** Nariell Morrison ([n.morrison@warwick.ac.uk](mailto:n.morrison@warwick.ac.uk))  
5  
6

7 **Subject area:** Medical Education

8 **Keywords:** diversity, ethnic groups, microaggressions, undergraduate, medical education, qualitative  
9 research  
10

11  
12 **MeSH terms:**

- 13 Cultural diversity
  - 14 Education, Medical, Undergraduate
  - 15 Minority Groups
  - 16 Microaggression
  - 17 Learning
  - 18 Qualitative Research
  - 19 Racism
  - 20 Students, Medical
  - 21 Schools, Medical
  - 22 United Kingdom
- 23  
24  
25  
26  
27

28 **Word count:** 8926  
29  
30  
31  
32  
33  
34  
35  
36  
37  
38  
39  
40  
41  
42  
43  
44  
45  
46  
47  
48  
49  
50  
51  
52  
53  
54  
55  
56  
57  
58  
59  
60

For peer review only

## Abstract

**Objective:** To explore graduate-entry medical students' experiences of racial microaggressions, the impact of these on learning, performance and attainment, and their views on how these can be reduced.

**Design:** Qualitative study using semi-structured focus groups and group interviews.

**Setting:** United Kingdom

**Participants:** 20 graduate-entry medical students were recruited using volunteer and snowball sampling; all students self-identified as being from racially minoritised (RM) backgrounds.

**Results:** Participants reported experiencing numerous types of racial microaggressions during their time at medical school. Students' accounts highlighted how these impacted directly and indirectly on their learning, performance, and well-being. Students frequently reported feeling uncomfortable and out of place in teaching sessions and clinical placements. Students also reported feeling invisible and ignored in placements and not being offered the same learning opportunities as their white counterparts. This led to lack of access to learning experiences or disengagement from learning. Many participants described how being from a RM background was associated with feelings of apprehension and having their 'guards up', particularly at the start of new clinical placements. This was perceived to be an additional burden that was not experienced by their white counterparts. Students suggested that future interventions should focus on institutional changes to diversify student and staff populations; shifting the culture to build and maintain inclusive environments; encouraging open, transparent conversations around racism and promptly managing any student-reported racial experiences.

**Conclusion:** RM students in this study reported that their medical school experiences were regularly affected by racial microaggressions. Students believed these microaggressions impeded their learning, performance, and well-being. It is imperative that institutions increase their awareness of the difficulties faced by RM students and provide appropriate support in challenging times. Fostering inclusion as well as embedding anti-racist pedagogy into medical curricula are likely to be beneficial.

## Article Summary

### Strengths and limitations of this study

- This study utilises a social constructivist approach, which provides an understanding of students' lived experiences of racial microaggressions and their perspectives on the impact of racial microaggressions on their learning, performance and well-being.
- This study has a multi-institutional, multi-gender, multi-cohort qualitative data set.
- The use of online focus groups and group interviews allowed frank responses and recollection was facilitated through discussion.
- Data collection was conducted online due to the safety restrictions imposed by the COVID-19 pandemic, potentially affecting the rapport between the researchers and participants.
- Assessing a statistically significant association between racial microaggressions and medical students' mental health was beyond the scope of this paper.

## INTRODUCTION

Differential attainment in medical education has been well documented globally(1). Studies suggest that students from racially minoritised (RM) backgrounds, on average, perform less well than white counterparts in both machine-marked assessments of clinical knowledge and practical assessments of clinical competence(2-4). It has been noted that these differential attainments related to RM groups represents complex, systematic inequalities. These include prolonged social, economic, and educational inequalities in societies as well as structural and institutional policies and practices that promote white majority cultures that impact negatively on the health and learning experiences of RM students(5-7). In recent years, studies on differential attainment have widened to explore how experiences of racism and discrimination in medical education impact on learners and how these can be addressed at structural and individual levels.

While researching overt and direct forms of racism, such as racial epithets or physical assaults, in medical education continues to be important, it has been recognised that more subtle forms of racism such as racial microaggressions impact on students and are likely to contribute to attainment differentials(8, 9). Racial microaggressions are defined as ‘brief and commonplace daily verbal, behavioural, or environmental indignities, whether intentional or unintentional, that communicate hostile, derogatory, or negative racial slights and insults toward people of colour’(10). Racial microaggressions can be difficult to manage due to their intangibility; they are often minimised as simple racial faux pas or cultural missteps(11). Studies have shown that these ‘subtle racist’ interactions(12) have caused significant distress, affect physical and mental health and have impacted on learning and academic attainment on learners in different educational settings, including primary, secondary and tertiary educational institutions(13-19). The wider literature on racial microaggressions also suggest that experiencing racial microaggressions in the classroom can contribute towards hostile educational climates and has been linked to feelings of isolation, self-doubt, and invisibility(20-22). Moreover, racial microaggressions are also associated with anxiety, depression, alcohol use, and may alter diurnal cortisol secretion leading to increased physiological stress responses(23-25).

While evidence of racial microaggressions and their impact on learners in medicine is emerging, the evidence base relating to medical students is small and largely from the US(9, 11, 12, 26-32).

Although these studies document medical students’ reports of microaggressions and provide some evidence of impacts on learning, with the exception of Ackerman-Barger et al’s work(11), they offer few insights into how microaggressions directly and indirectly impact on students’ learning and performance. Furthermore, the extent to which the findings from these studies can be extended to

1  
2  
3 medical students learning in different health care systems and socio-cultural contexts beyond the US  
4 is unclear. Two recent studies from the UK(33) and Sweden(12) highlighted daily experiences of  
5 microaggressions and provided some limited insights on impacts on learning. If medical schools are  
6 to address differential attainment, diversify the medical workforce, and create positive learning  
7 environments for RM students, there is an urgent need to understand how racial microaggressions  
8 are experienced by medical students in other countries and how they impact on their learning.  
9

10  
11  
12  
13  
14  
15 To the best of our knowledge, no published studies have explored, in any depth, racial  
16 microaggressions as experienced by United Kingdom (UK) medical students and their impact on  
17 learning. The UK Equality Act 2010 places a legal duty on universities to address any form of  
18 discrimination or harassment related to a protected characteristic that may be adversely impacting  
19 on students' learning experiences and environment(34). Graduate-entry medical (GEM) students  
20 have already demonstrated high academic achievements as they enter the medical programme with  
21 an existing undergraduate degree. As GEM courses currently account for approximately 10% of all  
22 UK medical programmes(35), it is important to report the experiences of RM GEM students and  
23 examine any impact on learning and performance; thus, contributing to the portfolio of research  
24 into racism and differential attainment in medical education.  
25  
26  
27  
28  
29  
30  
31

32  
33 We recognise that the use of terms to describe minority communities is a contested issue. It is  
34 therefore necessary to clearly establish a shared lexicon between the authors and readers of this  
35 paper. 'Race' is a socially constructed human categorisation system used to distinguish between  
36 groups of individuals that have similar phenotypes (36). Due to the social construction of 'race',  
37 dominant groups have shared and influenced racial categories in order to uphold power structures,  
38 resulting in racial inequality. Despite its social construction, 'race' is significant in the daily realities of  
39 RM people. We have chosen to use the term racially minoritised (RM) throughout this paper. Many  
40 scholars have highlighted the problematic use of the term 'Black, Asian and Minority Ethnic' (BAME),  
41 including its grouping together of diverse ethnicities into a single homogenous ethnic group(37, 38).  
42 The term RM provides a social constructionist approach to understanding that individuals have been  
43 actively minoritised by others through social processes of power and privilege(39). Terms such as  
44 BAME, ethnic minority and person of colour, do not acknowledge the influence of social processes.  
45 Although we use the term RM, some participants in this study used other terms such as BME (Black  
46 and Minority Ethnic); these are preserved in any quotes used to maintain authenticity. While we  
47 support the use of RM, we are aware that language is continuously evolving, within and between  
48 groups.  
49  
50  
51  
52  
53  
54  
55  
56  
57  
58  
59  
60



1  
2  
3  
4  
5 This paper reports data from a study of GEM students in the UK that built upon *Ackerman-Barger et*  
6 *al's* work(11), exploring UK GEM students' experiences of racial microaggressions and examining the  
7 impacts of these on learning and performance. The study had three aims: to identify experiences of  
8 racial microaggressions among RM medical students; to explore student perspectives on how their  
9 experiences of microaggressions impacted on their learning and performance; to use the lens of the  
10 student participants to identify how medical schools can reduce racial microaggressions and build  
11 more inclusive learning environments.  
12  
13  
14  
15  
16

## 17 **METHODS**

### 18 **Design**

19  
20 To explore and understand medical school students' experiences, this work was undertaken through  
21 a social constructivist lens. Social constructivism emphasises that learning and other cognitive  
22 functions are critically influenced by the environment, culture and social interactions(40). Given that  
23 students' learning experience in medical education can be theorised as a social process(40), social  
24 constructivism is an appropriate conceptual framework to direct and guide this work. A qualitative  
25 approach, using focus groups and group interviews to collect participants' narratives, was selected  
26 as this enabled reporting of the realities as perceived by participants(41-43).  
27  
28  
29  
30  
31  
32  
33

34  
35 Befitting our interpretivist approach, we also acknowledge the active role of the researchers (and  
36 subsequent subjectivity) in this study's design and analysis(44). Our research process was shaped by  
37 our team's diverse backgrounds, perspectives, and personal experiences of racial microaggressions;  
38 all of which enabled us to challenge ourselves and each other regarding how our subjectivity shaped  
39 our inquiry and interpretation. Thus, in the interest of reflexivity, we have detailed our own  
40 backgrounds. NM is an Honorary Clinical Research Fellow and a MSc student in Medical Education  
41 currently researching differential attainment, and a medical doctor who has experienced racial  
42 microaggressions first-hand. TZ and GW are GEM students, who have witnessed and experienced  
43 racism during their studies. OS is a Professor of Medical Education and a Consultant Obstetrician and  
44 Urogynaecologist with expertise in exploring differential attainment and has also experienced racial  
45 microaggressions. NM, TZ, GW and OS identify as being from RM backgrounds, namely Black British,  
46 Asian Pakistani, Mixed White/Black Caribbean, and Black African respectively. CB is an Associate  
47 Professor in Health Sciences who has extensively researched health and medical education in  
48 relation to socio-economic inequalities and socio-demographic factors. CB previously worked as a  
49 nurse, identifies as White British, and has witnessed racial microaggressions. All research team  
50 members have had prior experience undertaking qualitative research projects. The impact of our  
51  
52  
53  
54  
55  
56  
57  
58  
59  
60

1  
2  
3 individual subjectivities was discussed in team meetings and highlighted and challenged through the  
4 various stages of project design, development of data collection tools, data collection and analysis  
5 and production of the manuscript. We detail how these our subjectivities had the potential to  
6 impact positively and negatively in the discussion section.  
7  
8  
9

### 10 11 12 **Ethical approval**

13 Institutional ethical approval was obtained in March 2021 from the University of Warwick's Biomedical  
14 & Scientific Research Ethics Committee.  
15  
16

### 17 18 19 **Sample strategy and recruitment**

20 GEM students from medical schools in the UK who self-identified as being from a RM background  
21 were recruited. Participants were eligible to participate if they had at least one academic year  
22 experience of a UK GEM degree course. Snowball sampling was used in this research to gain access  
23 to the smaller RM populations, which can be difficult for researchers to reach. Twenty-one students  
24 registered interest and accepted the invitation to participate.  
25  
26  
27  
28  
29

### 30 31 32 **Data collection methods**

33 Data were gathered in focus groups and group interviews using a semi-structured interview  
34 schedule. Based on participants' availability, six focus groups, each of 4-5 multi-cohort students,  
35 were then scheduled throughout June – September 2021. Owing to unexpected scheduling changes,  
36 one volunteer could not attend any of the focus groups and as such those scheduled focus groups  
37 were more accurately classified as group interviews as they consisted of 2-3 people. The interview  
38 schedule (see supplementary information) was developed after a review of the literature and drew  
39 on themes identified in previous relevant research(11, 27, 33). The interview schedule consisted of  
40 open-ended discussion questions. Participants were asked to identify their experiences of racial  
41 microaggressions, and then they were invited to discuss how their experiences impacted them,  
42 including their learning and performance. Participants were also invited to identify how medical  
43 schools can tackle racial microaggressions and build more inclusive learning environments.  
44  
45  
46  
47  
48  
49  
50  
51

52 All interviews were held via Microsoft Teams to accommodate the COVID-19 pandemic-related  
53 restrictions and facilitated by either TZ or GW. Focus groups averaged sixty minutes and group  
54 interviews averaged forty-five minutes. First-hand narratives were encouraged throughout each  
55 discussion, and participants were prompted to clarify and expand their answers. Participants were  
56 asked to self-report the RM group they identified with using the 2011 UK Census categories(45).  
57  
58  
59  
60

1  
2  
3 First-hand narratives were encouraged throughout each discussion, and participants were prompted  
4 to clarify and expand their answers. Participants were encouraged to respond to others'  
5 contributions and, if possible, provide similar or contrasting accounts.  
6  
7  
8  
9

### 10 **Data processing and analysis**

11 All the interviews were video-recorded and transcribed verbatim by two researchers (TZ, GW).  
12 Transcripts were anonymised and QSR NVivo (Release 1.6.2)(46) software was used for data  
13 categorisation and management.  
14  
15  
16  
17

18 Thematic analysis was adopted using Braun and Clarke's six-phase framework(41). Themes were  
19 generated for each of the three broad interview discussion topics: experiences of racial  
20 microaggressions, impact of these experiences on participants and participants' views on how  
21 medical schools can address racial microaggressions. All members of the research team read the  
22 transcripts individually to familiarise themselves with the data. Research team members (NM, CB,  
23 OS) independently analysed and coded the data, then compared, discussed, and collectively agreed  
24 upon themes. Discussions provided a form of analyst triangulation(47) and enabled data  
25 interpretation from a range of multicultural interprofessional perspectives(48), establishing the  
26 validity and trustworthiness of the data. The Standards for Reporting Qualitative Research (SRQR)  
27 guidelines were adopted(49).  
28  
29  
30  
31  
32  
33  
34  
35  
36

### 37 **Patient and public involvement**

38 Patients or the public were not involved in the design and conduct of this study.  
39  
40

## 41 **RESULTS**

### 42 **Participants**

43 Twenty medical students participated in the study. Participant demographics are shown in figure 1.  
44 Participants were registered on a GEM degree course and therefore held either a minimum of an  
45 upper second-class honours undergraduate degree (or overseas equivalent) or a postgraduate  
46 degree such as a Master's or Doctoral qualification. Nineteen out of twenty participants were UK  
47 home students, schooled in the UK.  
48  
49  
50  
51  
52  
53  
54

55 Data were categorised into three main domains: examples of racial microaggressions; impact of racial  
56 microaggressions and participants' views on tackling racial microaggressions and building an inclusive  
57 medical school environment (figure 2).  
58  
59  
60

## Experiences of racial microaggressions

All participants highlighted experiences of racial microaggressions during undergraduate medical training. Participants reported that racial microaggressions came from numerous sources, including peers, faculty, and patients and occurred in both classroom and clinical environments. The data were categorised into six themes: Assumption of being foreign; Assumption of intellectual inferiority; Denial of individual racism; Renaming; Group labelling; and Stereotyping of behaviour.

### *Assumption of being foreign*

Most participants described instances of where they were assumed to have been born in a country abroad, even though the UK was their birthplace. Participants reported that such instances frequently occurred in the clinical environment when interacting with clinicians and patients:

*I went to see a patient...and then she was just like, "Oh where are you from?" and I was just like "London." And she was like "No." (P5; Black British Female)*

*... in terms of consultants, it's been more of that again, "where are you from?" (P4; Asian British Female)*

Some also remarked that they would be repeatedly asked the same question related to their heritage, if they initially did not provide the response the questioner wanted:

*I feel like that happens so much to me ... they kind of don't accept your first answer [when] you say you're from somewhere in England, they're like "no, no where are you from from?" (P17; Asian British Female)*

Some students were also reported that assumptions were made about their English language proficiency. These usually occurred in the clinical environment, with some students describing how it was assumed that English was not their first language, or they had language difficulties. This compounded assumptions that they were foreign-born:

*And I've also been told I speak English really well, uhm, by nursing staff, as well as patients. (P3; Asian British Female)*

*... and they asked if English was my first language and...after saying yes, it is my first language, they kind of started to disagree with me and [asked], "are you sure? Are you sure it's your first language?" And this was a staff member...a clinical tutor, so that was quite surprising. (P14; Asian British Female)*

Additionally, several students felt a sense of othering as they commented that the repetitive questioning of their nationality/heritage stemmed from the construction of the normative medical student as a White person:

1  
2  
3 *there's kind of like an assumption that the normal at medical school is white (P11; Asian*  
4 *British Female)*  
5  
6

### 7 **Assumption of intellectual inferiority**

8  
9 Participants frequently described experiences in which peers and patients made assumptions of  
10 intellectual inferiority. Many reported that in the clinical environment patients often questioned  
11 their medical student status as well as doubted their clinical and procedural skills' ability:  
12

13  
14 *So, patients been refusing to be seen by me, questioning my ability to take bloods or*  
15 *cannulate or, uh, do procedural stuff that any other student would undergo. (P6; Asian*  
16 *British Male)*  
17

18  
19 *I've also had some people tell me that I'm a lot cleverer than I look ... do you know what I*  
20 *mean there's just the [racial] undertone of it (P16; Mixed White/Black Female)*  
21  
22

23 This assumption of intellectual inferiority also appeared to manifest in participant accounts that  
24 described the false assumption held by some White students, that their counterparts from RM  
25 backgrounds were selected into medical school due to implementation of a racial quota system,  
26 rather than based on academic achievement:  
27  
28

29  
30 *we were discussing like how you get into Med school and [the student began] rolling their*  
31 *eyes and saying "yeah, but all these quotas are letting you know people who shouldn't be*  
32 *here, just because of positive, uh, discrimination" (P11; Asian British Female)*  
33  
34

### 35 **Denial of individual racism**

36  
37 Some participants felt that medical school faculty and peers did not appreciate or understand the  
38 challenges they faced, as RM students, during medical school. Participants reported examples of  
39 where their personal experiences of racism and bias were often denied by others:  
40  
41  
42

43  
44 *I feel like a lot of the times where I've tried to raise things, I think because it doesn't meet*  
45 *enough, it doesn't meet the threshold to, for someone to say that it was done with intent, to*  
46 *cause harm, people just try to excuse it away as other people being too sensitive (P11; Asian*  
47 *British Female)*  
48

49  
50 *... if I were to make a comment ... it would be like I've got a brown friend that says this and*  
51 *it's like I've got an Indian friend so it just kind of invalidates your opinion because they have a*  
52 *contact who's of an ethnic minority [background] to kind of supersede your opinion. (P13;*  
53 *Asian British Male)*  
54  
55  
56  
57  
58  
59  
60

### Renaming

Perception of difficult names was another common racial microaggression described by participants. Several students felt a sense of frustration as they commented faculty and clinicians would often avoid saying their name as they perceived students' names to be difficult to pronounce:

*... so my name is actually like at the top of the alphabet. So, I'm always sort of the first person on the roster and, but I end up being on the last person because they can't be bothered to pronounce it ...and then they're like "right, this is a difficult one". (P2; Arab Female)*

*...I've even had a consultant a couple of weeks ago, naming me and my CP [clinical partner] "One" and "Two." ... I'd never experienced that [before] ...we don't have long names and it would probably be easier to just call us by names. (P4; Asian British Female)*

One student described how they changed their name to avoid experiencing this racial microaggression and to stop feeling exasperated:

*I changed my name specifically because I was frustrated with people pronouncing my name wrong, so I don't get it a lot anymore with my first name. (P5; Black British Female)*

Additionally, participants explained that faculty and peers would frequently mispronounce their name, often trying to shorten, substitute or anglicise it without their permission. Many found this alienating and impeding to build relationships with others:

*... I've had one member of staff suggest a nickname for me, like they've shortened my name for me...my name literally has 6 letters, it's very easy to pronounce. (P3; Asian British Female)*

### Group labelling

Many participants expressed experiences of group labelling, by their peers, based on their perceived racial appearance. These experiences predominantly occurred in the medical school environment. Some students felt devalued and dehumanised by their peers as less effort was made to identify each person individually:

*we are somehow known as the "Brown Group" ... that's how we're referred to and ... when someone said it to my face, I was just like "What do you mean Brown Group?" And they're like "yeah, yeah, you know all of you brown people." (P4; Asian British Female)*

*I've had people refer to [us] as coloured people (P18; Black British Female)*

Misidentification in both the medical school and clinical environments was also reported by participants. Most students described experiences in which peers and medical school faculty had difficulty distinguishing between them and other students from similar RM backgrounds whereas

fewer students reported instances of mistaken identity by clinicians whilst on their clinical placements:

*...I walked into a room and was called the name of another Brown girl with curly hair and I addressed it straight up. I was like ... "I'm not that person. We're just both mixed race and have curly hair" ...we don't even look remotely similar. (P1; Mixed White/Black Female)*

*I was standing at the back of the theatre and then [the consultant] turned to me and ... asked me to do something and then she only realised when I was like "Oh, I, I can't do that. I'm not like qualified!" She was like "Oh, it's you, you're a student. You [and the registrar] look so alike," and I was just like but we really don't. (P5; Black British Female)*

### **Stereotyping of behaviour**

Many students talked about experiencing stereotypical slurs, where generalised beliefs about the behaviour of those from specific racial or ethnic groups were often vocalised by peers, faculty, and clinicians. Some students remarked that incorrect assumptions were made about them. This negatively affected their relationships with peers and staff:

*I've been called "sassy" quite a bit. I've never been called "sassy" so much until I came to this medical school. (P5; Black British Female)*

*... subtle racist comments [were] made during CBL (Case Based Learning) sessions..., for example [questions like], "oh, what are you having for lunch today? Is it you know, rice and curry?" They [would respond] "No, actually I'm having pasta." (P4; Asian British Female)*

A few students remarked that patients were also subject to negative stereotyping by faculty members. Such stereotyping reinforced racial bias and led to the further marginalisation of students from similar RM backgrounds:

*... one of the lecturers made reference to [a National Health Service Trust] and how a lot of the [Asian] patients suffer from (malingering) Mrs Bibi syndrome (P6; Asian British Male)*

### **Impact of racial microaggressions on academic learning, performance, and mental wellbeing**

Participants reported various impacts of the racial microaggressions on their daily lives including their academic learning, performance, and mental wellbeing. These data were categorised into 6 themes: Feeling uncomfortable and out of place; Feeling guarded; Sense of doubt; Additional burden; Denied learning opportunities; and Disengagement from learning.

#### **Feeling uncomfortable and out of place**

Participants reported how experiencing microaggressions could have a significant impact on their identity and belongingness. The racial microaggressions they experienced made them

1  
2  
3 uncomfortable, lonely, isolated, and feeling out of place. This was a strong view reported by most  
4 participants.  
5  
6  
7

8 *I would say overall just feeling uncomfortable is a very common feeling I do experience when*  
9 *I do get subjected to microaggressions; being very uncomfortable, feeling very embarrassed*  
10 *and then sometimes, especially on like later reflection and it can even you know, grow*  
11 *into anger and disdain and annoyance. (P18; Black British Female)*  
12

13  
14 *You kind of, are made to feel so disillusioned and out of place on the course. (P10; Mixed*  
15 *White/Black Female)*  
16

17 While some students became frustrated and disillusioned, others tried to cope by hiding their  
18 personality, trying to fit in and conform:  
19

20 *And it makes you feel that you have to kind of accommodate others more than they can*  
21 *accommodate you... and so you try and conform as much as possible. (P13; Asian British*  
22 *Male)*  
23  
24

### 25 **Feeling guarded**

26 Students expressed how previous experiences of microaggressions leads to feeling worried, anxious,  
27 and apprehensive in new and different environments. This was associated with a sense of being 'on  
28 guard' strongly noted by most participants which they found exhausting:  
29  
30  
31

32  
33 *I think another thing that I feel personally is I feel quite apprehensive when I'm starting a*  
34 *new placement because I don't know how people are going to perceive me and how they're*  
35 *going to treat me.' (P3; Asian British Female)*  
36  
37

38 *Like whenever we start new things, new rotations, you know how we do so much group*  
39 *work. It's always like oh well, who's going to be saying something and like you're just kind of*  
40 *waiting for the problems to arrive so it leaves you feeling really exhausted. (P11; Asian British*  
41 *Female)*  
42

43 Students explained that this feeling is even more pronounced in small settings, e.g., GP practice and  
44 community home visits, making them guarded and unable to relax in the first instance:  
45  
46  
47

48 *..... it's sort of unfamiliar territory until you get that sense of ease and then you can sort of*  
49 *relax and let your guard down. But up until then, especially on the first meeting, it's always*  
50 *guards up and OK, I'm going to have to uh sort of see what I'm going to have to uhm, not*  
51 *deal with, but sort of go with? (P4; Asian British Female)*  
52

53 *We don't really know what we are walking into and then for a second we're like what if*  
54 *they're really angry or really don't like people from other cultures. It was all fine in the end,*  
55 *but it made us really weary and then it made me realise how dangerous particular*  
56 *community placements can feel ..... (P11; Asian British Female)*  
57  
58  
59  
60



### **Sense of doubt**

The impact of racial microaggressions on emotional wellbeing was evident in participants' narratives. Many students discussed how they frequently had feelings of self-doubt, unsure if they were overthinking what happened which is then followed by a sense of inadequacy and questioning whether they were good enough. In the following, three participants discussed their shared experiences of self- doubt:

*I think you start doubting yourself a little bit, you're like, am I reading too much into it? Was this actually that bad? .... It's I guess, it eats at you sometimes, but it's mostly just the doubt of, am I, am I really suffering from discrimination right now? This is always the question that I try to ask myself because I, I'm not a person who likes confrontation or things like that so. So, I try to avoid it as much as possible. (P15; Arab Male)*

*I don't think I could have phrased it any better. I think you're completely right in saying that it eats at you and it just kind of, makes you doubt yourself both as, I don't know. (P16; Mixed White/Black Female)*

*Yeah, I really agree with what the others have said as well that yeah, you really doubt yourself you overthink it um and it just makes you, it makes me feel quite like, second class. (P17; Asian British Male)*

### **Additional burden**

Additional burden refers to the extra worry, stress, apprehension, and pressure that participants reported experiencing. Collectively, this was strongly perceived by participants to be over and above that experienced by white majority students and associated with experiencing microaggressions and constantly needing to prove themselves. This ultimately led to stress and, feeling exhausted, as reflected in the following:

*It is another kind of added layer to the stress that we already have and I think personally for me, I just quite, find it quite exhausting. ...yeah but when it happens constantly, it's like breaking, it's like trying to hammer through a wall and you just keep doing constantly, constantly, eventually it's going to break (P5; Black British Female)*

*it's just something else for you to worry about experiencing these microaggressions and how people are viewing you differently. It's just something else to worry about on top of everything else that I'm guessing a lot of people not from ethnic minorities don't have to worry about. (P1; Mixed White/Black Female)*

*...having that extra pressure on you in a field that's already quite like high intensity uhm, can be a lot. (P9; Black British Female)*

### **Denied learning opportunities**

Denied learning opportunities was one of the key ways racial microaggressions appeared to impact students' learning. Students strongly stated that these active denials of opportunities occurred in various contexts such as not being able to practise clinical skills, no invitations to study groups, no sharing of resources, and poor engagement / differential treatment from clinical faculty despite wanting to keenly participate. The outcome of these were poor and negative student learning experiences:

*... my white [clinical partner] kind of gets questioned a little bit more. And I know we all hate being questioned by consultants, but I actually do find it useful sometimes so I would like some questions to be directed my way. But it feels like they kind of questioned her more and put her forward to kind of do histories and things before me, even though I am very willing to. (P1; Mixed White/Black Female)*

*I was actually really excited to go in and see a C-section [caesarean section] for the first time...And there was a White girl in the room as well. And the White girl was the same grade as me, same year as me. We knew each other and she was allowed to kind of assist and do like parts of the procedure and when the obstetrician walked in, she kind of just looked at me and she was like "who are you?" And I was like "oh I'm the other Med Student." She didn't even dignify me with a verbal response. She kind of just pointed me out the room which was really demeaning (P8; Asian British Female).*

*Often patients are more agreeable in being seen by them (white students) and having procedures done by them. (P6; Asian British Male)*

### **Disengagement from learning**

Impact on students' learning and performance was a key manifestation of racial microaggressions. This was in part a culmination of experiences as discussed in the themes already reported above: lack of and inequitable learning opportunities, additional burdens, feeling uncomfortable and out of place. However, students further strongly identified disengagement from learning (from not fully applying themselves, reduced attendance and feeling unwanted) a significant contributor to their poor performance. These impacts on students' engagement with learning resulted from microaggressions experienced from a range of groups including peers, patients, supervisors, and healthcare workers:

*For me, they, the only thing that it probably makes me feel is that I don't want to go into placement and I say that .... Because that's a regular feeling anyway. You just think to yourself "I don't want to have to go through all of this again." ..... you're there to learn ultimately, and if you're going to get this from all sides, that's not just patients, but you're gonna get it from healthcare staff as well, it just makes it "well what is the point in me being here?" (P20; Black British Male)*

*I find a lot, when I'm talking to a consultant or another medical staff member, particularly when I'm with my clinical partner, who is white.... Sometimes I just think, Oh well, they're not*

1  
2  
3 *interested in me being here, so I won't listen and I won't engage, I won't kind of apply myself*  
4 *as much as I could, so then obviously, I'm taking less from that experience on placement.*  
5 *(P10; Mixed White/Black Female)*  
6  
7

8 *... that sort of impacted my performance ..... the fact that I was less inclined to go into*  
9 *placements. (P18; Black British Female)*  
10  
11

12 The impact of microaggressions on academic performance became clearer as students emphasised  
13 the reduced access and disruption of learning opportunities coupled with the disengagement from  
14 learning leading to their reduced performance.  
15  
16

### 17 18 **Participants' views on tackling racial microaggressions and building an inclusive medical school** 19 **environment**

20  
21 Participants were asked their views on how racial microaggressions experienced during their  
22 undergraduate training could be tackled by their medical schools and on how medical schools could  
23 build more inclusive environments. Participants' views were categorised into 5 themes: Staff should  
24 'hear it and deal with it'; 'Don't brush it under the carpet'; 'Someone like us'; and Shifting the  
25 majority culture to an anti-racist stance.  
26  
27  
28  
29

#### 30 31 **Staff should 'hear it and deal with it'**

32  
33 A high number of participants identified that often, racial microaggressions had been witnessed by  
34 medical school staff but not challenged at the point in time they occurred. Participants felt strongly  
35 that medical school staff should deal with racial microaggressions 'in the moment', as soon as they  
36 witnessed them:  
37  
38  
39

40  
41 *... like on medical school sites, like the CBL facilitators, hardly ever step in when there's*  
42 *uncomfortable moments and say, well, actually we don't think that should happen or that*  
43 *shouldn't be said. And often it's like kind of, if it's dealt with at all, it's never in the moment ...*  
44 *if they're teaching a session or leading a session or group work, if a comment is made, and*  
45 *they hear it, they need to deal with it straight away. (P11; Asian British Female)*  
46  
47

48 *...it's almost too late then to act in retrospect. And I think they need to put more in place. So*  
49 *it's. Being proactive rather than just reactive (P10; Mixed White/Black Female)*  
50  
51

52 Training staff to 'hear it and deal with it' in the moment was identified as a strategy to help staff  
53 respond proactively to these situations:  
54  
55

56 *... but more staff training, so I think we spoke briefly about earlier how the impact when staff*  
57 *don't act as allies or when staff let comments go unchallenged or stuff. And let, sort of these*  
58 *racist, racist or racial narratives, run through different settings. Things I think, if the staff and*  
59  
60

1  
2  
3 particularly clinical staff too have some sort of training about how to be an ally for all  
4 different groups of minorities. (P10; Mixed White/Black Female)  
5  
6

### 7 **'Don't brush it under the carpet'**

8  
9 Closely associated with the theme above was the strongly held view that people's experiences of  
10 racial microaggressions should not be 'brushed under the carpet'. Rather, they should be openly  
11 acknowledged, and strategies put in place to challenge them:  
12  
13

14  
15 ... it would be nice if they acknowledged the problem as it is or demonstrated some  
16 understanding of the challenges that we face. (P6; Asian British Male)  
17

18  
19 ... just acknowledging that these are things that happen and not kind of brushing it under the  
20 carpet, 'cause we all know [name of Medical School] has a habit of just hiding their  
21 problems. (P8; Asian British Female)  
22

23 Some participants expressed that the responsibility for calling out racial microaggressions should not  
24 be left to RM students, who were already trying to navigate these difficult situations in addition to  
25 their studies. A medical school 'where people call out these [racial] microaggressions ...would  
26 definitely improve our medical school experience'. Suggestions included having an identified person  
27 responsible for speaking up about microaggressions was a possible solution, for example a senior  
28 member of the medical school or a 'speak up' guardian. The idea of other students and staff being  
29 trained to act as allies or active bystanders was evident in participants' discourses.  
30  
31  
32  
33  
34  
35

### 36 **'Someone like us'**

37  
38 As noted earlier, participants frequently identified that as RM students, they felt they were learning  
39 to be doctors in a majority white environment and culture. Most participants reported that there  
40 was the need for more faculty members and students 'like us' from RM backgrounds. Participants  
41 reported that, in their experience, very few academic and faculty members were from RM groups.  
42 Extending the number of faculty members from RM groups was viewed as central to building an  
43 inclusive medical school.  
44  
45  
46  
47  
48  
49

50 Faculty members from RM backgrounds were identified as people that could understand the  
51 challenges that RM students faced. They were also people that participants said they felt more  
52 comfortable sharing experiences with or going to for support. The idea of 'having mentors that have  
53 been through similar difficulties and understood what it is like to be a BME student was also raised:  
54  
55  
56  
57

58 ... an increased number of medical staff from a minority background would be useful, 'cause I  
59 think at the moment we have like the one who is kind of responsible for like everything and I  
60

1  
2  
3 *know it's, it probably is a lot of pressure on, on his head because now everything that*  
4 *happens with anyone, they, they kind of feel like he's the only person that they can talk to,*  
5 *so. (P8; Asian British Female)*  
6

7 *Because I agree like if we had someone to talk to as well but who is like us, like us being like*  
8 *minority. If we had someone to talk to who is similar to us that would just be so much, so*  
9 *much help. (P13; Asian British Male)*  
10

11  
12 *I think that's something that would genuinely really be helpful, but in, in also in the, in terms*  
13 *of having mentors that have been through it and understood what it's like to be a BME*  
14 *student. I, I often find that there are consultants, for example, who are BME who are able to*  
15 *support you and take the time to understand what you need better than some of the staff at*  
16 *the medical school. (P6; Asian British Male)*  
17  
18

19 Having more peers from RM groups was also identified as central to building inclusive medical  
20 schools. Participants frequently commented that there should be more students 'like us' on medical  
21 school programmes and it was a commonly held perception that there were proportionally less  
22 students from RM backgrounds who were selected via admissions processes.  
23  
24  
25

26  
27 *... I think first and foremost what I would say, and it might not be possible, but just a more*  
28 *diverse cohort ... (P13; Asian British Male)*  
29

30 Several participants also highlighted the value of peer mentorship schemes that provided RM  
31 students with peer support networks:  
32  
33

34  
35  
36 *I was just going to say one scheme that I think has really helped, that I think has been set up*  
37 *by students more than anything else, is the BME mentor scheme. (P14; Asian British Female)*  
38

39 *That was my only outlet, was the BME mentor, and also I applied for I don't know number 2*  
40 *with your mentor, I applied for like you know the general mentors I put please, if possible you*  
41 *can they like be BME, and I did, and so my general parents from Med school. Anyway, my*  
42 *parents were BME, they were all Asian, so it kind of helped. (P13; Asian British Male)*  
43  
44

### 45 **Shifting the majority culture to an anti-racist stance**

46 A common thread in all focus groups and mentioned by a high majority of participants was the need  
47 for major institutional change to both the curriculum and the institutional culture to an anti-racist  
48 stance. Racial microaggressions from other students were commonly reported and participants  
49 voiced strongly that ongoing diversity, inclusivity, and anti-racism education for students was central  
50 to tackling microaggressions and building inclusive medical schools. Participants often appreciated  
51 the one-off diversity or anti-racism sessions provided by their medical schools, but as the quotes  
52 below illustrate, they felt that learning opportunities needed to be compulsory and threaded  
53 throughout the medical education programme:  
54  
55  
56  
57  
58  
59  
60

1  
2  
3  
4 ... we had a, a talk on melanin medics at the beginning of the year and, and it was just  
5 basically they, I think they were talking about microaggressions and stuff like that and how  
6 uhm, how common it is and the, the impacts on people of colour. Um and it was just one talk  
7 and I feel like if they had maybe a few more throughout the year and if it was kind of more of  
8 a widespread thing, I think that could be really beneficial. (P17; Asian British Male)  
9

10  
11 Yeah, I think like just making these things compulsory and not just like didactic lectures like  
12 having some sort of back and forth engagement so you know the student on the other side is  
13 actually engaging with what's being taught, and is actually kind of participating in the  
14 material, if that makes sense. (P14; Asian British Female)  
15

16 Although an ongoing education programme was seen as important, there was a strongly held view in  
17 all the focus groups that tackling racial microaggressions and building a more inclusive medical  
18 school required structural changes within medical schools.  
19

20  
21  
22  
23 Participants in all of the focus groups highlighted that that there needed to be a shift in the majority  
24 culture so that racial microaggressions or any forms of racism were unacceptable:  
25

26  
27 ... at the bare minimum is to actually have a zero-tolerance policy for students and for staff...  
28 (P1; Mixed White/Black Female)  
29

30  
31 So, I think the problem isn't usually with the medics like themselves, or at least the Med  
32 school students overtly. It's usually either with the faculty or the patients ... (P15; Arab Male)  
33

34  
35 Uhm, I think beyond training, uh, a structural thing or an organisation thing that needs to be  
36 put on as an actual policy about how to deal with these kinds of situations, because there  
37 isn't one. (P2; Arab Female)  
38

39 As the above illustrates shifting the majority culture to an anti-racist stance was viewed as requiring  
40 widespread changes, including the introduction of policies at university and NHS Trust level that held  
41 people to account if their behaviour was unacceptable. Additionally, student-friendly complaints  
42 policies for reporting racist encounters and creating a culture within which people are able to speak  
43 up feel confident and supported to challenge other people's views and behaviours were seen as  
44 important.  
45  
46  
47  
48  
49

## 50 **DISCUSSION**

51  
52 This qualitative study of UK GEM students from RM backgrounds has provided a greater  
53 understanding of the racial microaggressions experienced by medical students and its impact on  
54 learning and academic performance. To date, their lived experiences of racism during medical  
55 training have been underexplored, making it difficult to develop interventions. In the UK 37% of  
56 medical students identify as RM(50) and 44.3% of doctors identify as RM even though a significant  
57  
58  
59  
60

1  
2  
3 number are International Medical Graduates(51).\_This study, to our knowledge, is the first to explore  
4 the racial microaggressions experienced by UK GEM students. Participants reported experiencing six  
5 types of racial microaggressions during their undergraduate training: assumptions of being foreign,  
6 assumptions of intellectual inferiority, denial of racial experiences, renaming, group labelling, and  
7 stereotyping. While some microaggressions could be experienced in both classroom and clinical  
8 environments, others were more commonly experienced in clinical environments and others tended  
9 to relate to the classroom/university environment.  
10  
11  
12  
13  
14  
15

16 Most students reported that regular experiences of racial microaggressions from peers, faculty,  
17 clinicians, and patients negatively impacted, directly and indirectly, on their learning, academic  
18 performance, and well-being. Students frequently reported feeling uncomfortable, out of place,  
19 guarded and worried in teaching sessions and clinical placements, where there was an assumption  
20 that RM students were 'foreign', and that Whiteness was the norm. This was perceived to be an  
21 additional mental burden that they felt was not experienced by their white counterparts. As  
22 described in cognitive load theory, this additional mental burden could be conceptualised as an  
23 extrinsic cognitive load, which has the potential to interfere with learning(52). Some participants felt  
24 invisible and ignored in placements and not being offered the same learning opportunities as their  
25 white counterparts. This led to poor access to learning experiences and disengagement from  
26 learning.  
27  
28  
29  
30  
31  
32  
33  
34  
35  
36

37 Additionally, participants suggested that future interventions should focus on institutional changes  
38 they felt would promote inclusivity and develop a sense of belonging within medical schools.  
39 Proposed interventions included encouraging open conversations around racism to improve  
40 understanding of the experiences RM students; diversification of student and staff populations;  
41 additional faculty training; and changes to medical education curricula which should include a  
42 programme of anti-racism training and critical consciousness education to promote meaningful  
43 understandings about diversity, racism, and other forms of social inequality.  
44  
45  
46  
47  
48  
49

50 This study makes a significant contribution to the medical education literature by building upon  
51 previous research(11, 27, 29, 53), and theorising about the causes of academic underperformance in  
52 RM students. Some of the findings from this study align with previous quantitative and qualitative  
53 studies of racial microaggressions in medical education. For example, the experiences of racial  
54 microaggressions occurred in both the clinical and non-clinical settings(30). These were similar to  
55 those reported in other studies, such as querying students' country of origin(12), mispronouncing  
56  
57  
58  
59  
60

1  
2  
3 names(32), assuming lower level of intellect compared to peers(11, 29), mistaken identity(12, 29,  
4 32), hyper-vigilance to threats of racism(31) , and being ignored(12, 29). Moreover, the examples of  
5 racial microaggressions identified in this study are also akin to those described in the psychology  
6 literature(10, 54).  
7  
8  
9

10  
11 The wider literature on marginalised groups may aid understanding of the immediate consequences  
12 of racial microaggressions(55). Minority stress theory(56, 57) suggests that marginalised individuals  
13 experience high levels of stress because of prejudice and discrimination associated with their  
14 stigmatised identity, leading to long-term psychological and physiological outcomes. Sue and  
15 Spanierman also use the life-change model of stress to explain how the cumulative effect of  
16 experiencing racial microaggressions can negatively impact RM individuals' psychological and  
17 physical health (58).  
18  
19  
20  
21  
22  
23

24  
25 The psychological impact of racial microaggressions has been alluded to in previous literature, for  
26 example having a negative impact on learning(11, 29), feelings of isolation, disengagement(59),  
27 experiencing an additional burden(11), and fewer clinical opportunities(12). However, a key tenet of  
28 our study compared to other studies is that its qualitative methodology and recruitment of students  
29 from medical schools across the UK, generated in-depth accounts from participants that shed light  
30 on the pathway from experiences of microaggressions to lower academic performance via damaging  
31 impacts on learning. Most other studies have failed to provide such in-depth narratives due to the  
32 adoption of survey methods and some are limited due to accounts from students in single medical  
33 schools only.  
34  
35  
36  
37  
38  
39  
40

41  
42 Previous studies in both the general and student populations have found the additional burden of  
43 racial microaggressions increases worry and lowers self-esteem(60) and can affect mental health  
44 and psychological wellbeing(24, 61, 62). However, in our study compared to some others, although  
45 mental wellbeing impacts were implied, impacts on mental health were not specifically investigated.  
46 Some quantitative medical education studies that have utilised validated measures of mental health  
47 have been able to explore the association between racial microaggressions and depression(27) and  
48 burnout(29).  
49  
50  
51  
52  
53

54  
55 While most studies make recommendations for reducing microaggressions and racist experiences,  
56 medical students' views on strategies and policies for change are not well documented. Medical  
57 students in Ackerman-Barger et al's US study(11) highlighted the importance of promoting diversity  
58  
59  
60



1  
2  
3 and allyship, curriculum reform, open conversations, and safe spaces. Our study of UK GEM students  
4 identified similar themes but additionally, highlighted the importance of ‘hear it and deal with it  
5 [microaggressions]’ in the moment, at the point that they occur. It also emphasised the need to  
6  
7  
8 ‘shift the majority culture, with institutional change from the top to the bottom of the medical  
9  
10 school.

### 11 12 13 **Strengths and weaknesses**

14  
15 The use of online focus groups and group interviews encouraged frank responses and recollection  
16 was facilitated through discussion. Participants were able to build upon others’ responses, providing  
17 further understanding of experiences and perspectives. The multi-cohort, multi-institutional data set  
18 also enabled the data to elicit narrative experiences from GEM students at various stages of  
19 undergraduate training.  
20  
21  
22

23  
24  
25 Although recruitment of this study was targeted nationally, the largest proportion of study  
26 participants came from the same geographical region in the UK. This region, however, has the  
27 largest number of GEM students in the UK. As a result, the experiences described in this study may  
28 best reflect a specific region of the UK and it is not clear whether these findings would be replicated  
29 in other institutions. There was a greater predominance of female participants in our research (M:F  
30 1:3), but RM groups were well represented. This may limit result transferability to male medical  
31 students; however, we note that intersectionality between multiple identities are likely to impact  
32 attainment in medicine(63). Moreover, we did not note any significant differences between the  
33 gender and ethnic groups in their reported experiences.  
34  
35  
36  
37  
38  
39  
40

41  
42 Conducting the focus groups/interviews online may have affected the rapport between the  
43 researchers and participants. While this may have also limited interactions between participants, it  
44 had the advantage of facilitating discussions between students from different areas of the country,  
45 which would have been difficult if face-to-face. Another limitation is that it some participants may  
46 have been fearful of expressing certain views or sharing sensitive personal experiences, whilst others  
47 may have dominated interviews and thus some topics may have been less discussed. As focus  
48 groups/interviews were made up of participants from different RM groups, when a student did not  
49 have anyone else from their own RM group in their focus group/interview, they may have felt less  
50 able to participate of express their views. Because the themes that emerged from the data were  
51 reliant on the chosen sample, alternative themes may have developed if the study had included  
52  
53  
54  
55  
56  
57  
58  
59  
60

1  
2  
3 more or different participants. Furthermore, participants may have had specific motives for  
4 participating, which may have influenced the topics that emerged in the focus groups/interviews.  
5  
6  
7

8 Using reflexivity, the interviewers' identity characteristics and their status as fellow medical  
9 students, may have influenced the participants' discussion on specific topics. Participants'  
10 perceptions of the interviewers may have made them feel more at ease while discussing personal  
11 and sensitive topics. Other participants, on the other hand, may have found it difficult to explore  
12 some issues in depth with a fellow student. While such influence cannot be quantified, and no  
13 participant expressed discomfort in discussing their experiences due to the interviewers' traits, it is  
14 still a possibility. It is also possible that individual research team members' experiences of medical  
15 education, racism impacted data interpretation; those who experienced racism may have been more  
16 likely to give precedence to student accounts of experiences that resembled their own.  
17  
18  
19  
20  
21  
22  
23

24  
25 As with other qualitative studies, generalisability is an inherent difficulty(64) and thus cannot be  
26 claimed. The aim of this study was not to provide generalisations, but to provide an exploration of  
27 racial microaggressions in medical education, with a view to inform future research and  
28 interventions. While it may have resonance for medical students and other health care students  
29 learning in similar social and cultural contexts(11, 65), our study findings are likely to promote  
30 reflection by medical school staff, clinicians, students, and other stakeholders.  
31  
32  
33  
34  
35  
36

### 37 **Implications of the study**

38 All medical students need a supportive, inclusive environment to learn and perform successfully.  
39 However, this can be difficult for RM students due to several factors. The high prevalence of racial  
40 microaggressions is evident. Racial microaggressions were easily recalled by students and they felt  
41 that these microaggressions negatively impacted their day-to-day experiences. Students were able  
42 to provide a variety of examples, which involved patients, faculty, peers, and clinicians. The racial  
43 microaggressions experienced were not isolated occurrences but instead, regularly occurred  
44 throughout students' undergraduate medical school journey. This repetitive nature could explain the  
45 additional mental burden students described, impeding both their wellbeing and ability to learn and  
46 perform well. Our work adds weight to the cognitive load theory, highlighted by Ackerman-Barger et  
47 al.(66), where the cognitive impact associated with microaggressions cumulatively builds up over  
48 time and impairs productivity, mental function, and relationships, impacting on RM students'  
49 learning, performance, and progression.  
50  
51  
52  
53  
54  
55  
56  
57  
58  
59  
60

1  
2  
3 Our findings suggest that more needs to be done to support RM students and increase faculty's  
4 awareness of the difficulties they face. Both tailored student support for marginalised students and  
5 environments that foster inclusion, have been identified as potential factors to facilitate academic  
6 success(67, 68). Moreover, diversifying faculty is likely to assist with student support, develop a  
7 more inclusive environment, and may help increase awareness of the different forms of racism.  
8  
9

10  
11  
12  
13 The prevalent belief that faculty had a general lack of awareness of this form of racism does not  
14 mean that medical schools were not starting to make progress on tackling racial microaggressions;  
15 however, our findings indicate that medical schools need to be more proactive in their anti-racist  
16 pedagogy and interventions. A lack of a systematic approach and consistent education on racial  
17 inequities and the effects of racism in the clinical environment was noted in this study. This suggests  
18 a need for strategic change and policy initiatives at all levels, including overarching institutional  
19 bodies, education and training councils and medical schools themselves. In the UK, the Medical  
20 Schools Councils' Equality, Diversity and Inclusion Alliance was recently formed with the specific aim  
21 to provide practical guidance to support medical schools to become fair, diverse and inclusive  
22 environments in which to study and work(69). We believe that an iterative component of the  
23 medical curriculum, specifically focused on equality, diversity and inclusion (EDI) issues should be  
24 developed, thus ensuring a number of key EDI topics are regularly revisited throughout the course so  
25 that students develop a critical consciousness(70) about diversity issues and racism. Moreover,  
26 guidance on how to deal with racial microaggressions in all learning environments as well as  
27 effective response strategies needs to be developed, to empower both recipients and bystanders.  
28 Furthermore, this and other studies suggests that medical schools should also review their anti-  
29 racism training for faculty.  
30  
31  
32  
33  
34  
35  
36  
37  
38  
39  
40  
41  
42

43 A lack of institutional accountability and policy enforcement by faculty were highlighted in this study  
44 and could dissuade students from reporting incidents and seeking support, therefore affecting their  
45 wellbeing and student experience. Our findings suggest that, in addition to training faculty and  
46 students, institutions should be dealing with student-reported experiences of racial  
47 microaggressions in a timely manner. This will likely restore students' trust in institutions, increase  
48 transparency and contribute towards creating equitable, inclusive learning environments for all  
49 students to thrive in. In the UK, small steps have been taken to address institutional accountability,  
50 for example, the introduction of BMA Racial Harassment Charter(71) and Advance HE Race Equality  
51 Charter(72).  
52  
53  
54  
55  
56  
57  
58  
59  
60

1  
2  
3 While this study's participants attributed several mental health outcomes to experiencing racial  
4 microaggressions, none identified any physical health outcomes. Nonetheless, previous studies have  
5 highlighted the correlation between racial microaggressions and the activation of physiological  
6 stress responses, including the hypothalamic–pituitary–adrenal (HPA) axis and the sympathetic–  
7 adrenal–medullary axis (SAM)(73-76), suggesting that acute and chronic activations of the HPA and  
8 SAM axes could lead to several deleterious health outcomes(23, 76, 77).  
9  
10  
11  
12  
13  
14

### 15 **Future research**

16 This study highlights a gap in the medical education research literature related to understanding the  
17 impact of racism on students' educational experience, learning and academic performance. Further  
18 research is needed to critically examine models and interventions tackling racial microaggressions as  
19 well as exploration of institutional efforts to build inclusive learning environments within medical  
20 education. Exploration of other types of microaggressions based on protected characteristics, such  
21 as religion, sex, sexual orientation and disability and their impact on medical students' mental  
22 health, learning, academic performance, and retention would make worthy contributions to the  
23 field. This could be explored further by examining the impact of microaggressions and discrimination  
24 based on intersecting social identities, e.g., Black and female. Research into students and doctors'  
25 experiences of inclusion as well as institutional processes for promoting equity, diversity and  
26 belonging needs to be carried out.  
27  
28  
29  
30  
31  
32  
33  
34  
35  
36

37 Although, we have reported RM students as a collective group, we recognise that individuals are not  
38 homogenous. Experiences of racial microaggressions may vary between and within RM groups and  
39 further research is needed to identify how medical students from different RM groups experience,  
40 and are impacted by, racial microaggressions.  
41  
42  
43  
44

### 45 **CONCLUSION**

46 This is the first study exploring UK GEM students' experiences of racial microaggressions. It extends  
47 current knowledge of medical students' experiences of microaggressions and their impact on  
48 students' attainment, highlighting how these impacts are evident in an education and health care  
49 system beyond the US. In this study, students from RM backgrounds reported recurrent experiences  
50 of racial microaggressions that impeded their learning, academic performance, and well-being.  
51 Efforts and future interventions focusing on institutional changes to diversify student and staff  
52 populations; encouraging open, transparent conversations around racism including racial  
53 microaggressions; and promptly managing any student-reported racial experiences are likely to be  
54 key to shift the culture to proactively foster inclusive learning environments. As more students from  
55  
56  
57  
58  
59  
60

1  
2  
3 RM backgrounds enter the medical profession, educators should actively aim to remove barriers to  
4 learning by supporting students to thrive and reach their full academic potential. Institutions have a  
5 responsibility to directly address all forms of racism, including microaggressions. This study  
6 highlights salient issues to be considered by all stakeholders of medical education.  
7  
8  
9  
10  
11  
12  
13  
14  
15  
16  
17  
18  
19  
20  
21  
22  
23  
24  
25  
26  
27  
28  
29  
30  
31  
32  
33  
34  
35  
36  
37  
38  
39  
40  
41  
42  
43  
44  
45  
46  
47  
48  
49  
50  
51  
52  
53  
54  
55  
56  
57  
58  
59  
60

For peer review only

1  
2  
3 **Funding:** 'This research received no specific grant from any funding agency in the public, commercial  
4 or not-for-profit sectors'.  
5  
6  
7

8 **No competing interests:** "All authors have completed the ICMJE uniform disclosure form at  
9 [www.icmje.org/coi\\_disclosure.pdf](http://www.icmje.org/coi_disclosure.pdf) and declare: no support from any organisation for the submitted  
10 work; no financial relationships with any organisations that might have an interest in the submitted  
11 work in the previous three years; no other relationships or activities that could appear to have  
12 influenced the submitted work."  
13  
14  
15  
16  
17

18 **Author contributions:** NM conceived of the research project. NM designed the research project  
19 under the supervision of CMB. TZ and GW collected the data. NM, CMB and OS analysed the data.  
20 All authors interpreted the data. NM, TZ, OS and CMB wrote the first draft of the article, and all  
21 authors revised it critically for important intellectual content. NM, CMB and OS revised the draft  
22 paper. All authors approved of the final version to be published. NM is the guarantor.  
23  
24  
25  
26  
27

28 **Ethical approval:** Ethical approval was granted by The University of Warwick Biomedical and  
29 Scientific Research Ethics Committee (BSREC 17/20-21)  
30  
31  
32

33 **Participants consent:** All participants gave informed consent.  
34  
35  
36

37 **Data sharing statement:** No additional data are available as data are held in safe haven.  
38  
39

40 **Provenance and peer review:** Not commissioned; externally peer reviewed.  
41  
42  
43

44 **Transparency statement:** NM affirms that the manuscript is an honest, accurate, and transparent  
45 account of the study being reported; that no important aspects of the study have been omitted; and  
46 that any discrepancies from the study as originally planned (and, if relevant, registered) have been  
47 explained.  
48  
49  
50  
51  
52  
53  
54  
55  
56  
57  
58  
59  
60

## References

1. Woolf K. Differential attainment in medical education and training. *BMJ*. 2020;368:m339.
2. Woolf K, McManus IC, Potts HW, Dacre J. The mediators of minority ethnic underperformance in final medical school examinations. *Br J Educ Psychol*. 2013;83(Pt 1):135-59.
3. McManus IC, Richards P, Winder BC, Sproston KA. Final examination performance of medical students from ethnic minorities. *Med Educ*. 1996;30(3):195-200.
4. Wass V, Roberts C, Hoogenboom R, Jones R, Van der Vleuten C. Effect of ethnicity on performance in a final objective structured clinical examination: qualitative and quantitative study. *BMJ*. 2003;326(7393):800-3.
5. Fyfe M, Horsburgh J, Blitz J, Chiavaroli N, Kumar S, Cleland J. The do's, don'ts and don't knows of redressing differential attainment related to race/ethnicity in medical schools. *Perspect Med Educ*. 2022;11(1):1-14.
6. Williams DR, Mohammed SA. Discrimination and racial disparities in health: evidence and needed research. *Journal of Behavioral Medicine*. 2009;32(1):20-47.
7. Williams DR, Lawrence JA, Davis BA. Racism and health: evidence and needed research. *Annual review of public health*. 2019;40:105-25.
8. Neville P. When I say ... everyday racism. *Med Educ*. 2022;56(3):260-1.
9. Bullock JL, O'Brien MT, Minhas PK, Fernandez A, Lupton KL, Hauer KE. No One Size Fits All: A Qualitative Study of Clerkship Medical Students' Perceptions of Ideal Supervisor Responses to Microaggressions. *Academic Medicine*. 2021;96(11S):S71-S80.
10. Sue DW, Capodilupo CM, Torino GC, Bucceri JM, Holder AM, Nadal KL, et al. Racial microaggressions in everyday life: implications for clinical practice. *Am Psychol*. 2007;62(4):271-86.
11. Ackerman-Barger K, Boatright D, Gonzalez-Colaso R, Orozco R, Latimore D. Seeking Inclusion Excellence: Understanding Racial Microaggressions as Experienced by Underrepresented Medical and Nursing Students. *Acad Med*. 2020;95(5):758-63.
12. Kristoffersson E, Rönqvist H, Andersson J, Bengs C, Hamberg K. "It was as if I wasn't there" – Experiences of everyday racism in a Swedish medical school. *Social Science and Medicine*. 2021;270.
13. Smith WA, Franklin JD, Hung M. The Impact of Racial Microaggressions Across Educational Attainment for African Americans. *Journal of Minority Achievement, Creativity, and Leadership*. 2020;1(1):70-93.
14. Nadal KL, Wong Y, Griffin KE, Davidoff K, Sriken J. The adverse impact of racial microaggressions on college students' self-esteem. *Journal of college student development*. 2014;55(5):461-74.
15. Suárez-Orozco C, Casanova S, Martin M, Katsiaficas D, Cuellar V, Smith NA, et al. Toxic Rain in Class: Classroom Interpersonal Microaggressions. *Educational Researcher*. 2015;44(3):151-60.
16. Kohli R, Solórzano DG. Teachers, please learn our names!: racial microaggressions and the K-12 classroom. *Race Ethnicity and Education*. 2012;15(4):441-62.
17. Harwood SA, Hunt MB, Mendenhall R, Lewis JA. Racial microaggressions in the residence halls: Experiences of students of color at a predominantly White university. *Journal of Diversity in Higher Education*. 2012;5(3):159.

18. Huynh VW. Ethnic microaggressions and the depressive and somatic symptoms of Latino and Asian American adolescents. *Journal of youth and adolescence*. 2012;41(7):831-46.
19. Sue DW. *Microaggressions in everyday life: Race, gender, and sexual orientation*: John Wiley & Sons; 2010.
20. Yosso T, Smith W, Ceja M, Solórzano D. Critical race theory, racial microaggressions, and campus racial climate for Latina/o undergraduates. *Harvard Educational Review*. 2009;79(4):659-91.
21. Solorzano D, Ceja M, Yosso T. Critical race theory, racial microaggressions, and campus racial climate: The experiences of African American college students. *Journal of Negro education*. 2000:60-73.
22. Torino GC, Rivera DP, Capodilupo CM, Nadal KL, Sue DW. Everything You Wanted to Know About Microaggressions but Didn't Get a Chance to Ask. In: Torino GC, Rivera DP, Capodilupo CM, Nadal KL, Sue DW, editors. *Microaggression Theory: Influence and Implications*: John Wiley & Sons, Inc.; 2018. p. 1-15.
23. Zeiders KH, Landor AM, Flores M, Brown A. Microaggressions and Diurnal Cortisol: Examining Within-Person Associations Among African-American and Latino Young Adults. *J Adolesc Health*. 2018;63(4):482-8.
24. Torres L, Driscoll MW, Burrow AL. Microaggressions and psychological functioning among high achieving African-Americans: A mixed-methods approach. *Journal of Social and Clinical Psychology*. 2010.
25. Blume AW, Lovato LV, Thyken BN, Denny N. The relationship of microaggressions with alcohol use and anxiety among ethnic minority college students in a historically White institution. *Cultural diversity and ethnic minority psychology*. 2012;18(1):45.
26. Ackerman-Barger K, London M, White D. When an Omitted Curriculum Becomes A Hidden Curriculum: Let's Teach to Promote Health Equity. *Journal of Health Care for the Poor and Underserved*. 2020;31(4):182-92.
27. Anderson N, Lett E, Asabor EN, Hernandez AL, Nguemeni Tiako MJ, Johnson C, et al. The Association of Microaggressions with Depressive Symptoms and Institutional Satisfaction Among a National Cohort of Medical Students. *J Gen Intern Med*. 2022;37(2):298-307.
28. Brown C, Daniel R, Addo N, Knight S. The experiences of medical students, residents, fellows, and attendings in the emergency department: Implicit bias to microaggressions. *Aem Education and Training*. 2021;5:S49-S56.
29. Chisholm LP, Jackson KR, Davidson HA, Churchwell AL, Fleming AE, Drolet BC. Evaluation of Racial Microaggressions Experienced During Medical School Training and the Effect on Medical Student Education and Burnout: A Validation Study. *Journal of the National Medical Association*. 2021;113(3):310-4.
30. Espallat A, Panna DK, Goede DL, Gurka MJ, Novak MA, Zaidi Z. An exploratory study on microaggressions in medical school: What are they and why should we care? *Perspect Med Educ*. 2019;8(3):143-51.
31. Kristoffersson E, Hamberg K. "I have to do twice as well" - managing everyday racism in a Swedish medical school. *Bmc Medical Education*. 2022;22(1).
32. Strayhorn TL. Exploring the Role of Race in Black Males' Sense of Belonging in Medical School: A Qualitative Pilot Study. *Medical Science Educator*. 2020;30(4):1383-7.
33. Morrison N, Machado M, Blackburn C. Student perspectives on barriers to performance for black and minority ethnic graduate-entry medical students: a qualitative study in a West Midlands medical school. *BMJ Open*. 2019;9(11):e032493.



- 1  
2  
3  
4  
5  
6  
7  
8  
9  
10  
11  
12  
13  
14  
15  
16  
17  
18  
19  
20  
21  
22  
23  
24  
25  
26  
27  
28  
29  
30  
31  
32  
33  
34  
35  
36  
37  
38  
39  
40  
41  
42  
43  
44  
45  
46  
47  
48  
49  
50  
51  
52  
53  
54  
55  
56  
57  
58  
59  
60
34. Equality & Human Rights Commission. What equality law means for you as an education provider – further and higher education: Equality and Human Rights Commission; 2014 [Available from: [https://www.equalityhumanrights.com/sites/default/files/what\\_equality\\_law\\_means\\_for\\_you\\_as\\_an\\_education\\_provider\\_further\\_and\\_higher\\_education.pdf](https://www.equalityhumanrights.com/sites/default/files/what_equality_law_means_for_you_as_an_education_provider_further_and_higher_education.pdf)].
35. Kumwenda B, Cleland J, Greatrix R, MacKenzie RK, Prescott G. Are efforts to attract graduate applicants to UK medical schools effective in increasing the participation of under-represented socioeconomic groups? A national cohort study. *BMJ Open*. 2018;8(2):e018946.
36. LeCompte MD, Schensul JJ. Designing and conducting ethnographic research: An introduction: Rowman Altamira; 2010.
37. Sarfo-Annin JK. Ethnic inclusion in medicine: the ineffectiveness of the ‘Black, Asian and Minority Ethnic’ metric to measure progress. *BJGP open*. 2020;4(5).
38. Milner A, Jumbe S. Using the right words to address racial disparities in COVID-19. *The Lancet Public Health*. 2020;5(8):e419.
39. Gunaratnam Y. *Researching Race and Ethnicity*. London 2003. Available from: <https://methods.sagepub.com/book/researching-race-and-ethnicity>.
40. Kaufman DM. Teaching and Learning in Medical Education: How Theory Can Inform Practice. *Understanding Medical Education: Evidence, Theory, and Practice* 2018. p. 37-69.
41. Kiger ME, Varpio L. Thematic analysis of qualitative data: AMEE Guide No. 131. *Med Teach*. 2020;42(8):846-54.
42. Braun V, Clarke V. Using thematic analysis in psychology. *Qualitative Research in Psychology*. 2006;3(2):77-101.
43. Braun V, Clarke V. Thematic analysis. *APA handbook of research methods in psychology, Vol 2: Research designs: Quantitative, qualitative, neuropsychological, and biological*. APA handbooks in psychology®. Washington, DC, US: American Psychological Association; 2012. p. 57-71.
44. Varpio L, Ajjawi R, Monrouxe LV, O'Brien BC, Rees CE. Shedding the cobra effect: problematising thematic emergence, triangulation, saturation and member checking. *Med Educ*. 2017;51(1):40-50.
45. UK Government. List of ethnic groups: 2011 Census UK: UK Government; 2021 [Available from: <https://www.ethnicity-facts-figures.service.gov.uk/style-guide/ethnic-groups#2011-census>].
46. QSR International Pty Ltd. NVivo Version Release 1.6.2. 2022.
47. Patton MQ. Enhancing the quality and credibility of qualitative analysis. *Health Serv Res*. 1999;34(5 Pt 2):1189-208.
48. Barbour RS. Checklists for improving rigour in qualitative research: a case of the tail wagging the dog? *BMJ*. 2001;322(7294):1115-7.
49. O'Brien BC, Harris IB, Beckman TJ, Reed DA, Cook DA. Standards for reporting qualitative research: a synthesis of recommendations. *Acad Med*. 2014;89(9):1245-51.
50. Higher Education Statistics Agency (HESA). Table 42 - UK domiciled qualifiers by subject of study and ethnicity 2019/20 to 2021/22 HE Student Data UK: Higher Education Statistics Agency (HESA); 2023 [Available from: <https://www.hesa.ac.uk/data-and-analysis/students/table-42>].
51. UK Government. NHS Workforce UK: UK Government; 2020 [Available from: <https://www.ethnicity-facts-figures.service.gov.uk/workforce-and-business/workforce-diversity/nhs-workforce/latest>].

- 1
- 2
- 3
- 4 52. Young JQ, Van Merriënboer J, Durning S, Ten Cate O. Cognitive Load Theory: implications for medical education: AMEE Guide No. 86. *Med Teach*. 2014;36(5):371-84.
- 5
- 6 53. Gilliam C, Russell CJ. Impact of racial microaggressions in the clinical learning environment and review of best practices to support learners. *Curr Probl Pediatr Adolesc Health Care*. 2021;51(10):101090.
- 7
- 8
- 9 54. Williams MT, Skinta MD, Martin-Willett R. After Pierce and Sue: A Revised Racial Microaggressions Taxonomy. *Perspectives on Psychological Science*. 2021;16(5):991-1007.
- 10
- 11 55. Wong G, Derthick AO, David EJ, Saw A, Okazaki S. The What, the Why, and the How: A Review of Racial Microaggressions Research in Psychology. *Race Soc Probl*. 2014;6(2):181-200.
- 12
- 13
- 14
- 15 56. Harrell SP. A multidimensional conceptualization of racism-related stress: implications for the well-being of people of color. *Am J Orthopsychiatry*. 2000;70(1):42-57.
- 16
- 17 57. Meyer IH. Prejudice, social stress, and mental health in lesbian, gay, and bisexual populations: conceptual issues and research evidence. *Psychol Bull*. 2003;129(5):674-97.
- 18
- 19 58. Sue DW, Spanierman LB. *Microaggressions in everyday life*, 2nd ed. Hoboken, NJ, US: John Wiley & Sons, Inc.; 2020. xx, 349-xx, p.
- 20
- 21
- 22
- 23 59. Teshome BG, Desai MM, Gross CP, Hill KA, Li F, Samuels EA, et al. Marginalized identities, mistreatment, discrimination, and burnout among US medical students: cross sectional survey and retrospective cohort study. *BMJ*. 2022;376:e065984.
- 24
- 25
- 26 60. Wong-Padoongpatt G, Zane N, Okazaki S, Saw A. Decreases in implicit self-esteem explain the racial impact of microaggressions among Asian Americans. *J Couns Psychol*. 2017;64(5):574-83.
- 27
- 28
- 29
- 30 61. Huynh VW. Ethnic microaggressions and the depressive and somatic symptoms of Latino and Asian American adolescents. *J Youth Adolesc*. 2012;41(7):831-46.
- 31
- 32
- 33 62. Teherani A, Hauer KE, Fernandez A, King TE, Jr., Lucey C. How Small Differences in Assessed Clinical Performance Amplify to Large Differences in Grades and Awards: A Cascade With Serious Consequences for Students Underrepresented in Medicine. *Acad Med*. 2018;93(9):1286-92.
- 34
- 35
- 36
- 37 63. Tsouroufli M, Rees CE, Monrouxe LV, Sundaram V. Gender, identities and intersectionality in medical education research. *Med Educ*. 2011;45(3):213-6.
- 38
- 39
- 40 64. Cohen L, Manion L, Morrison K. *Research Methods in Education*. New York: Routledge; 2018.
- 41
- 42 65. Sandoval RS, Afolabi T, Said J, Dunleavy S, Chatterjee A, Olveczky D. Building a Tool Kit for Medical and Dental Students: Addressing Microaggressions and Discrimination on the Wards. *MedEdPORTAL*. 2020;16:10893.
- 43
- 44
- 45 66. Ackerman-Barger K, Jacobs NN. The Microaggressions Triangle Model: A Humanistic Approach to Navigating Microaggressions in Health Professions Schools. *Acad Med*. 2020;95(12S Addressing Harmful Bias and Eliminating Discrimination in Health Professions Learning Environments):S28-S32.
- 46
- 47
- 48 67. Isik U, Wouters A, Croiset G, Kusurkar RA. "What kind of support do I need to be successful as an ethnic minority medical student?" A qualitative study. *BMC Med Educ*. 2021;21(1):6.
- 49
- 50
- 51
- 52 68. Dickins K, Levinson D, Smith SG, Humphrey HJ. The minority student voice at one medical school: lessons for all? *Acad Med*. 2013;88(1):73-9.
- 53
- 54
- 55 69. Medical Schools Council. MSC ED&I Alliance London: Medical Schools Council; 2021 [Available from: <https://www.medschools.ac.uk/our-work/equality-diversity-inclusion/msc-edi-alliance>].
- 56
- 57
- 58
- 59
- 60

- 1  
2  
3  
4  
5  
6  
7  
8  
9  
10  
11  
12  
13  
14  
15  
16  
17  
18  
19  
20  
21  
22  
23  
24  
25  
26  
27  
28  
29  
30  
31  
32  
33  
34  
35  
36  
37  
38  
39  
40  
41  
42  
43  
44  
45  
46  
47  
48  
49  
50  
51  
52  
53  
54  
55  
56  
57  
58  
59  
60
70. Kumagai AK, Lypson ML. Beyond cultural competence: critical consciousness, social justice, and multicultural education. *Acad Med.* 2009;84(6):782-7.
71. British Medical Association. A charter for medical schools to prevent and address racial harassment London: British Medical Association; 2020 [Available from: <https://www.bma.org.uk/media/2030/bma-med-school-charter-implementation.pdf>].
72. Advance HE. Race Equality Charter York: Advance HE; 2020 [Available from: <https://www.advance-he.ac.uk/equality-charters/race-equality-charter>].
73. Huynh VW, Huynh QL, Stein MP. Not just sticks and stones: Indirect ethnic discrimination leads to greater physiological reactivity. *Cultur Divers Ethnic Minor Psychol.* 2017;23(3):425-34.
74. Majeno A, Urizar GG, Halim MLD, Nguyen-Rodriguez ST, Gonzalez A. Examining the role of ethnic microaggressions and ethnicity on cortisol responses to an acute stressor among young adults. *Cultur Divers Ethnic Minor Psychol.* 2021;27(1):135-44.
75. Seaton EK, Zeiders KH. Daily racial discrimination experiences, ethnic-racial identity, and diurnal cortisol patterns among Black adults. *Cultur Divers Ethnic Minor Psychol.* 2021;27(1):145-55.
76. Berger M, Sarnyai Z. "More than skin deep": stress neurobiology and mental health consequences of racial discrimination. *Stress.* 2015;18(1):1-10.
77. Jadotte Y, Salmond S, Allread V. A Population Health Perspective on Racism and Racial Microaggressions. *Orthop Nurs.* 2022;41(2):148-57.

1  
2  
3  
4  
5  
6  
7  
8  
9  
10  
11  
12  
13  
14  
15  
16  
17  
18  
19  
20  
21  
22  
23  
24  
25  
26  
27  
28  
29  
30  
31  
32  
33  
34  
35  
36  
37  
38  
39  
40  
41  
42  
43  
44  
45  
46  
47  
48  
49  
50  
51  
52  
53  
54  
55  
56  
57  
58  
59  
60

**Figures**

Figure 1: Participants' Demographics

Figure 2: Domains and Themes

For peer review only

Figure 1: Participants' demographics

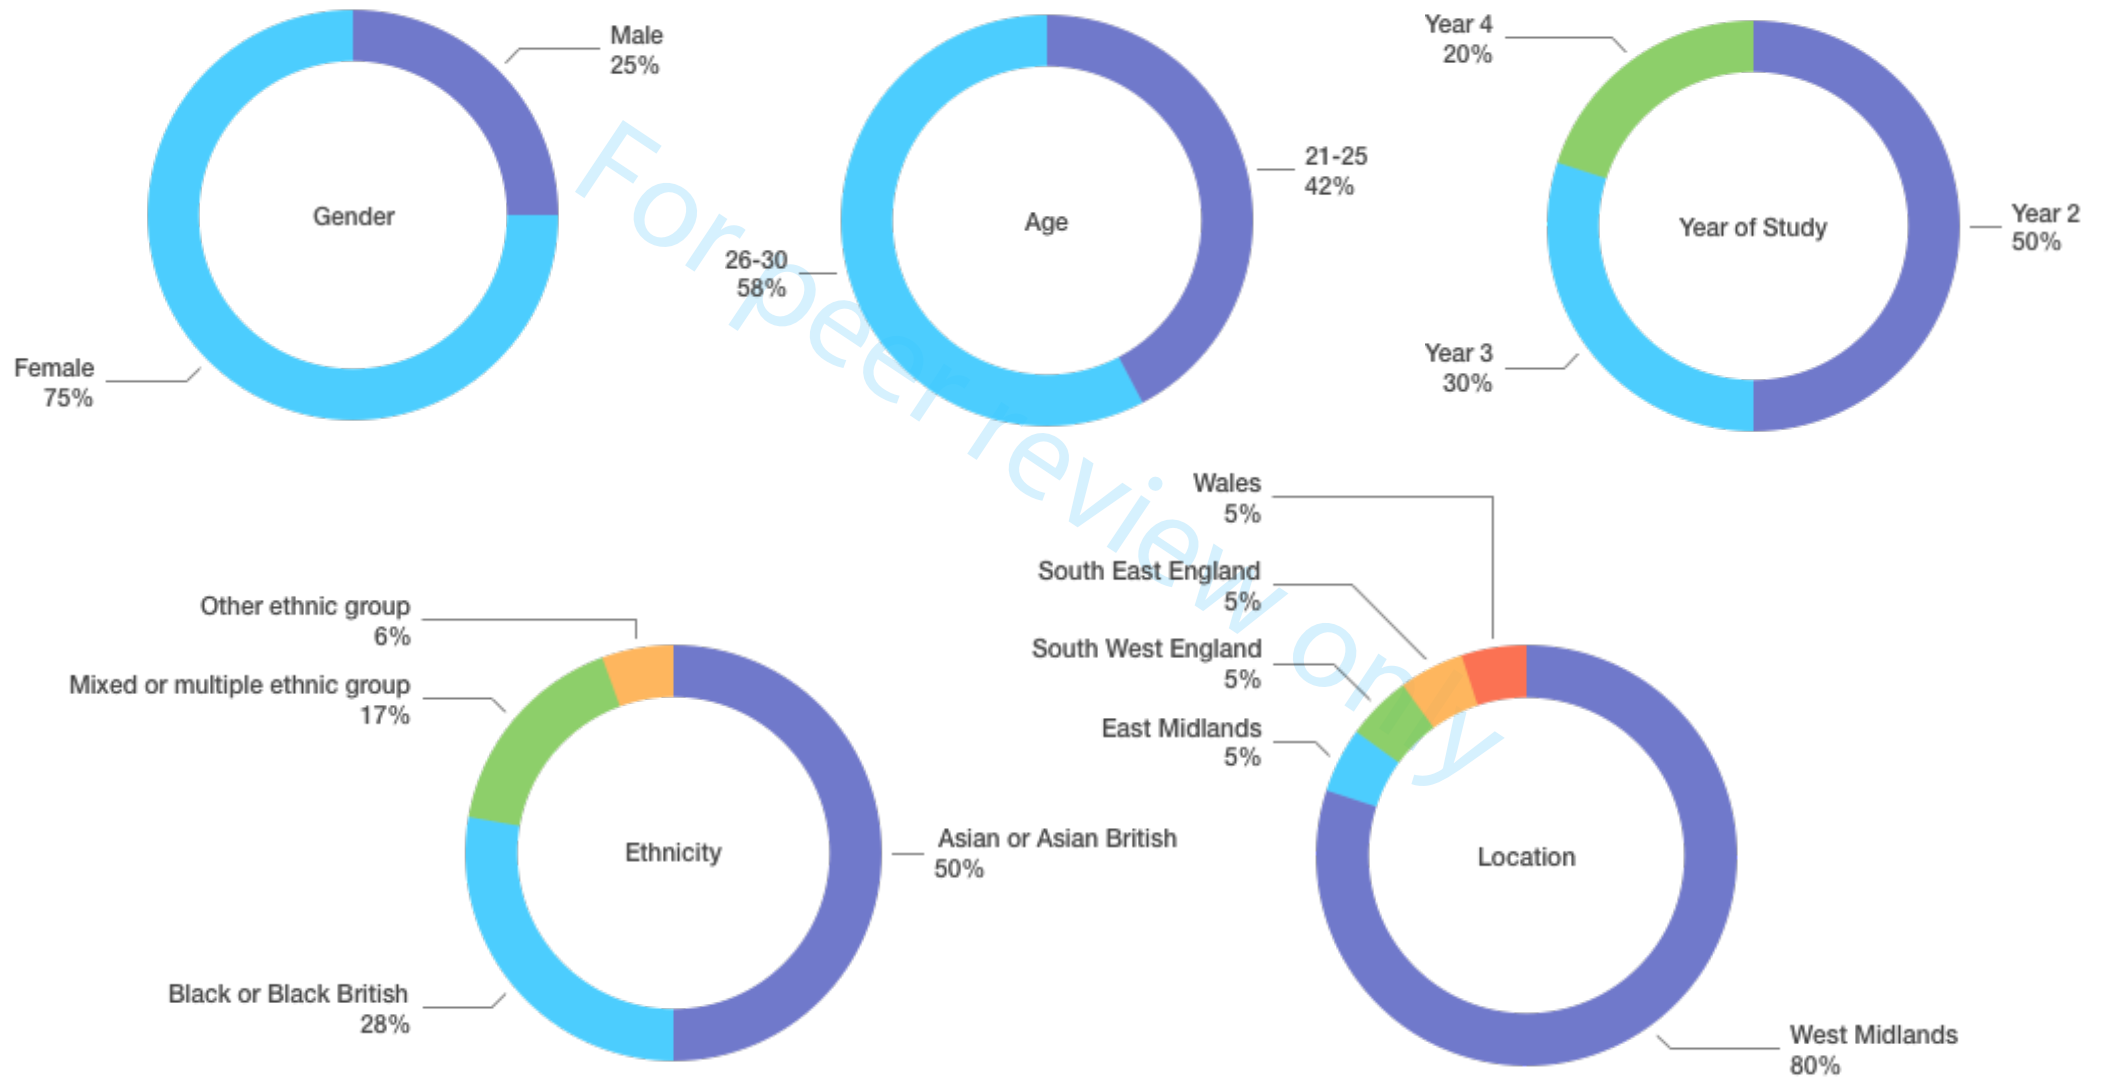

Figure 2: Domains and Themes

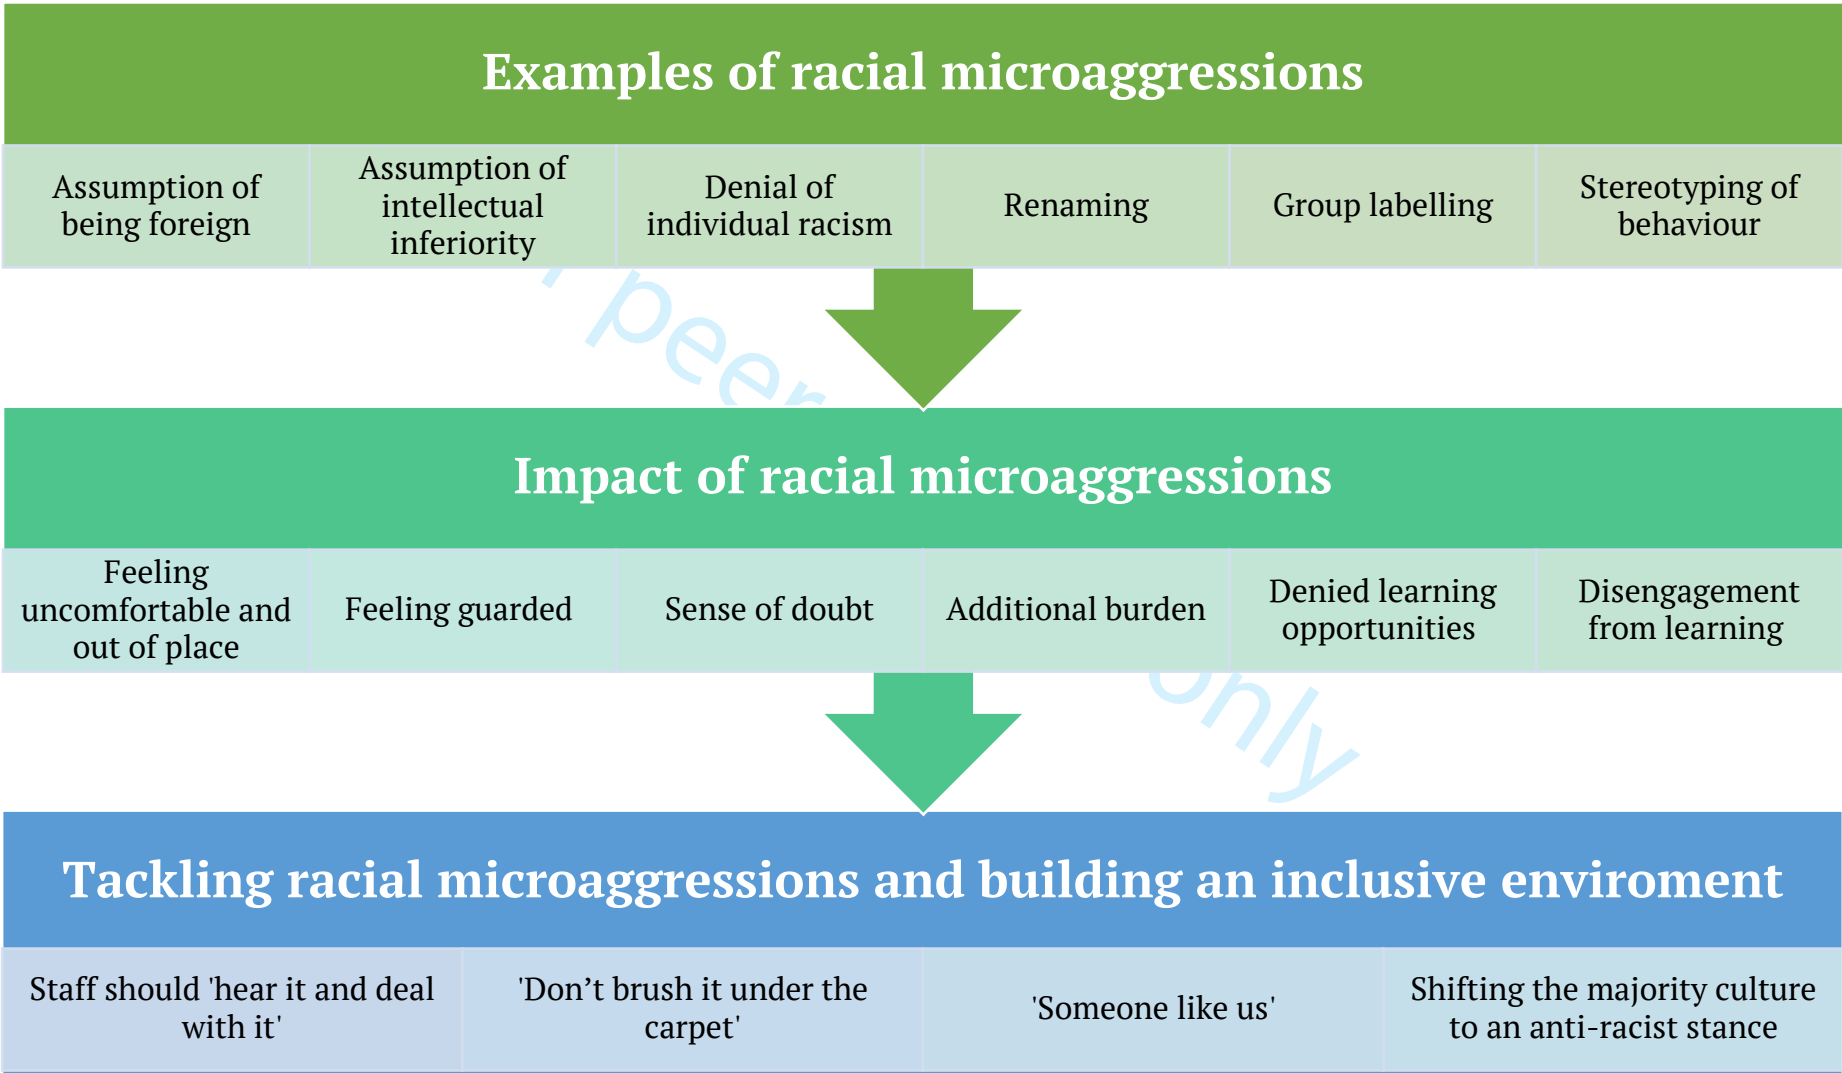

Supplemental material for “Where are you really from?”: A qualitative study of racial microaggressions and the impact on medical students in the United Kingdom

## **INTERVIEW SCHEDULE**

Preamble: *Thank you for joining us for this focus group. As you know, we are studying racial microaggressions as experienced by graduate-entry medical students such as yourselves. Racial microaggressions are brief and commonplace daily verbal, behavioural, or environmental indignities that communicate hostile, derogatory, or negative racial slights towards people of colour. The purpose of this study is to contribute student perspectives to the body of knowledge related to promoting student success in medical schools. Greater understanding of how microaggressions are experienced can lead to increased student support to help them reach their full academic potential.*

1. Have you experienced racial microaggressions during your time at medical school? If so, would you describe the circumstances?
2. Describe the feelings you had while receiving racial microaggressions.
3. What impact have racial microaggressions had on you?
4. Do you think racial microaggressions have impacted your learning and performance at medical school? If so, can you explain how racial microaggressions have impacted your learning and performance?
5. Visualise the ideal inclusive environment in your school. What would need to change in interactions and relationships to create this environment? What would need to change structurally or organizationally to create an inclusive environment?
6. Can you think of anything else your medical school can do to specifically support students from racially minoritised backgrounds?

Thank you very much for your participation and time.

As I said earlier, the information you have given me will be anonymised and held only by the research team.

## Standards for Reporting Qualitative Research (SRQR)\*

<http://www.equator-network.org/reporting-guidelines/srqr/>

Page/line  
no(s).

### Title and abstract

|                                                                                                                                                                                                                                                       |   |
|-------------------------------------------------------------------------------------------------------------------------------------------------------------------------------------------------------------------------------------------------------|---|
| <b>Title</b> - Concise description of the nature and topic of the study Identifying the study as qualitative or indicating the approach (e.g., ethnography, grounded theory) or data collection methods (e.g., interview, focus group) is recommended | 1 |
| <b>Abstract</b> - Summary of key elements of the study using the abstract format of the intended publication; typically includes background, purpose, methods, results, and conclusions                                                               | 3 |

### Introduction

|                                                                                                                                                              |     |
|--------------------------------------------------------------------------------------------------------------------------------------------------------------|-----|
| <b>Problem formulation</b> - Description and significance of the problem/phenomenon studied; review of relevant theory and empirical work; problem statement | 5-7 |
| <b>Purpose or research question</b> - Purpose of the study and specific objectives or questions                                                              | 5-7 |

### Methods

|                                                                                                                                                                                                                                                                                                                                                                                                      |           |
|------------------------------------------------------------------------------------------------------------------------------------------------------------------------------------------------------------------------------------------------------------------------------------------------------------------------------------------------------------------------------------------------------|-----------|
| <b>Qualitative approach and research paradigm</b> - Qualitative approach (e.g., ethnography, grounded theory, case study, phenomenology, narrative research) and guiding theory if appropriate; identifying the research paradigm (e.g., postpositivist, constructivist/ interpretivist) is also recommended; rationale**                                                                            | 7         |
| <b>Researcher characteristics and reflexivity</b> - Researchers' characteristics that may influence the research, including personal attributes, qualifications/experience, relationship with participants, assumptions, and/or presuppositions; potential or actual interaction between researchers' characteristics and the research questions, approach, methods, results, and/or transferability | 7-8,23-24 |
| <b>Context</b> - Setting/site and salient contextual factors; rationale**                                                                                                                                                                                                                                                                                                                            | 8         |
| <b>Sampling strategy</b> - How and why research participants, documents, or events were selected; criteria for deciding when no further sampling was necessary (e.g., sampling saturation); rationale**                                                                                                                                                                                              | 8         |
| <b>Ethical issues pertaining to human subjects</b> - Documentation of approval by an appropriate ethics review board and participant consent, or explanation for lack thereof; other confidentiality and data security issues                                                                                                                                                                        | 8         |
| <b>Data collection methods</b> - Types of data collected; details of data collection procedures including (as appropriate) start and stop dates of data collection and analysis, iterative process, triangulation of sources/methods, and modification of procedures in response to evolving study findings; rationale**                                                                             | 8-9       |
| <b>Data collection instruments and technologies</b> - Description of instruments (e.g., interview guides, questionnaires) and devices (e.g., audio recorders) used for data collection; if/how the instrument(s) changed over the course of the study                                                                                                                                                | 8-9       |
| <b>Units of study</b> - Number and relevant characteristics of participants, documents, or events included in the study; level of participation (could be reported in results)                                                                                                                                                                                                                       | 8         |
| <b>Data processing</b> - Methods for processing data prior to and during analysis, including transcription, data entry, data management and security, verification of data integrity, data coding, and anonymization/de-identification of excerpts                                                                                                                                                   | 8-9       |



|                  |                                                                                                                                                                                                                       |   |
|------------------|-----------------------------------------------------------------------------------------------------------------------------------------------------------------------------------------------------------------------|---|
| 1<br>2<br>3<br>4 | <b>Data analysis</b> - Process by which inferences, themes, etc., were identified and developed, including the researchers involved in data analysis; usually references a specific paradigm or approach; rationale** | 9 |
| 5<br>6<br>7      | <b>Techniques to enhance trustworthiness</b> - Techniques to enhance trustworthiness and credibility of data analysis (e.g., member checking, audit trail, triangulation); rationale**                                | 9 |

## Results/findings

|                |                                                                                                                                                                                                   |      |
|----------------|---------------------------------------------------------------------------------------------------------------------------------------------------------------------------------------------------|------|
| 10<br>11<br>12 | <b>Synthesis and interpretation</b> - Main findings (e.g., interpretations, inferences, and themes); might include development of a theory or model, or integration with prior research or theory | 9-20 |
| 13<br>14       | <b>Links to empirical data</b> - Evidence (e.g., quotes, field notes, text excerpts, photographs) to substantiate analytic findings                                                               | 9-20 |

## Discussion

|                                        |                                                                                                                                                                                                                                                                                                                                                                                                             |       |
|----------------------------------------|-------------------------------------------------------------------------------------------------------------------------------------------------------------------------------------------------------------------------------------------------------------------------------------------------------------------------------------------------------------------------------------------------------------|-------|
| 17<br>18<br>19<br>20<br>21<br>22<br>23 | <b>Integration with prior work, implications, transferability, and contribution(s) to the field</b> - Short summary of main findings; explanation of how findings and conclusions connect to, support, elaborate on, or challenge conclusions of earlier scholarship; discussion of scope of application/generalizability; identification of unique contribution(s) to scholarship in a discipline or field | 20-27 |
| 24                                     | <b>Limitations</b> - Trustworthiness and limitations of findings                                                                                                                                                                                                                                                                                                                                            | 23-24 |

## Other

|                |                                                                                                                                               |    |
|----------------|-----------------------------------------------------------------------------------------------------------------------------------------------|----|
| 27<br>28<br>29 | <b>Conflicts of interest</b> - Potential sources of influence or perceived influence on study conduct and conclusions; how these were managed | 28 |
| 30<br>31<br>32 | <b>Funding</b> - Sources of funding and other support; role of funders in data collection, interpretation, and reporting                      | 28 |

\*The authors created the SRQR by searching the literature to identify guidelines, reporting standards, and critical appraisal criteria for qualitative research; reviewing the reference lists of retrieved sources; and contacting experts to gain feedback. The SRQR aims to improve the transparency of all aspects of qualitative research by providing clear standards for reporting qualitative research.

\*\*The rationale should briefly discuss the justification for choosing that theory, approach, method, or technique rather than other options available, the assumptions and limitations implicit in those choices, and how those choices influence study conclusions and transferability. As appropriate, the rationale for several items might be discussed together.

### Reference:

O'Brien BC, Harris IB, Beckman TJ, Reed DA, Cook DA. **Standards for reporting qualitative research: a synthesis of recommendations.** *Academic Medicine*, Vol. 89, No. 9 / Sept 2014  
DOI: [10.1097/ACM.0000000000000388](https://doi.org/10.1097/ACM.0000000000000388)
