# Supplementary material for: ’Where are you really from?’: a qualitative study of racial microaggressions and the impact on medical students in the UK
Source: PubMed Central journal article supplement — BMJ Open. 2023 May 5;13(5):e069009. doi: 10.1136/bmjopen-2022-069009 (PMC10163503; doi:10.1136/bmjopen-2022-069009), 2023-05-05
Supplement: bmjopen-2022-069009supp001.pdf [file bmjopen-2022-069009supp001.pdf]

Supplemental material for “Where are you really from?": A qualitative study of racial microaggressions and the impact on medical students in the United Kingdom

## **INTERVIEW SCHEDULE**

*Preamble: Thank you for joining us for this focus group. As you know, we are studying racial microaggressions as experienced by graduate-entry medical students such as yourselves. Racial microaggressions are brief and commonplace daily verbal, behavioural, or environmental indignities that communicate hostile, derogatory, or negative racial slights towards people of colour. The purpose of this study is to contribute student perspectives to the body of knowledge related to promoting student success in medical schools. Greater understanding of how microaggressions are experienced can lead to increased student support to help them reach their full academic potential.*

1. Have you experienced racial microaggressions during your time at medical school? If so, would you describe the circumstances?
2. Describe the feelings you had while receiving racial microaggressions.
3. What impact have racial microaggressions had on you?
4. Do you think racial microaggressions have impacted your learning and performance at medical school? If so, can you explain how racial microaggressions have impacted your learning and performance?
5. Visualise the ideal inclusive environment in your school. What would need to change in interactions and relationships to create this environment? What would need to change structurally or organizationally to create an inclusive environment?
6. Can you think of anything else your medical school can do to specifically support students from racially minoritised backgrounds?

Thank you very much for your participation and time.

As I said earlier, the information you have given me will be anonymised and held only by the research team.
